# Supplementary material for: The genome of the simultaneously hermaphroditic snail Lymnaea stagnalis reveals an evolutionary expansion of FMRFamide-like receptors
Source: PubMed Central journal article supplement — Sci Rep. 2024 Nov 25;14:29213. doi: 10.1038/s41598-024-78520-1 (PMC11589774; doi:10.1038/s41598-024-78520-1), 2024-11-25
Supplement: 41598_2024_78520_MOESM6_ESM.pdf [file 41598_2024_78520_MOESM6_ESM.pdf]

**ST1. Annotation of *L. stagnalis* predicted protein sequences: Receptor Tyrosine Kinases (RTK). See HUGO gene nomenclature and conserved domain database for domain definition.**

| order  | RTK_type                                                | Lstagnalis GP                           | present domain                                                                   | absent domain           |
|--------|---------------------------------------------------------|-----------------------------------------|----------------------------------------------------------------------------------|-------------------------|
| ?      | ?                                                       | GSLYST00007363001                       | LRR-RI, Ephrin receptor_like (partial), TNFRSF(partial), PTKc                    | FNIII, FNIII, SAM       |
| ?      | ?                                                       | GSLYST00000618001                       | FNIII, PTKc                                                                      |                         |
| type01 | Type I RTKs: ErbB (epidermal growth factor)             | GSLYST00018222001                       | receptor L (partial), Furin-like (cystein rich), receptor L, GFR, GFR, PTKc-EGFR |                         |
| type02 | Type II RTKs: Insulin                                   | GSLYST00008439001                       | receptor L, Furin-like (cystein rich), receptor L, FNIII, FNIII, PTKc-Ins-like   |                         |
| type02 | Type II RTKs: Insulin                                   | GSLYST00021192001                       | receptor L, Furin-like (cystein rich), receptor L, FNIII, FNIII, PTKc-Ins-like   |                         |
| type03 | Type III RTKs: PDGFR, CSFR, Kit, FLT3                   | no match                                |                                                                                  |                         |
| type04 | Type IV RTKs: VEGF (vascular endothelial growth factor) | GSLYST00004989001                       | Ig, Ig, Ig, Ig, PTKc_VEGFR                                                       |                         |
| type05 | Type V RTKs: FGF (fibroblast growth factor)             | GSLYST00001552001                       | Ig, Ig2-FGFR, Ig3-FGFR-2, PTKc-FGFR                                              |                         |
| type05 | Type V RTKs: FGF (fibroblast growth factor)             | GSLYST00017427001                       | Ig, Ig3-FGFR, PTKc                                                               |                         |
| type05 | Type V RTKs: FGF (fibroblast growth factor)             | GSLYST00016773001+16774001              | Ig, PTKc + Ig, Ig2_Kirrel3, Ig2_Robo, Ig, Ig_Kirrel3                             |                         |
| type06 | Type VI RTKs: PTK7/CCK4                                 | GSLYST00016093001                       | Ig3_Robo, Ig, Ig2_Robo, Ig, Ig3, Ig3, PTK_CCK4                                   |                         |
| type07 | Type VII RTKs: Neurotrophin receptor/Trk                | GSLYST00007831001                       | LRR-RI, PTKc-TRK                                                                 | Ig, Ig,                 |
| type07 | Type VII RTKs: Neurotrophin receptor/Trk                | GSLYST00008464001                       | PTKc_TRK, TOMM_kin_cyc                                                           | LRR, Ig, Ig             |
| type08 | Type VIII RTKs: ROR                                     | GSLYST00009936001                       | IG, FZ (=CRDTR), Kringle, PTKc-ROR                                               |                         |
| type09 | Type IX RTKs: MuSK                                      | GSLYST00008324001+8323001               | FZ (8324001); Kringle (8323001), PTKc-MUSK (8323001)                             | Ig                      |
| type10 | Type X RTKs: HGF (hepatocyte growth factor)             | GSLYST00000013001                       | LAM-EGF x5, IPT x2, PTKc                                                         | SEMA, Psi               |
| type10 | Type X RTKs: HGF (hepatocyte growth factor)             | GSLYST00003015001                       | Sema_plexin-like, IPT, IPT, IPT, PTKc                                            | Psi                     |
| type10 | Type X RTKs: HGF (hepatocyte growth factor)             | GSLYST00003016001_17001_18001_plus_addi | tional_colocalized_transcripts                                                   |                         |
| type10 | Type X RTKs: HGF (hepatocyte growth factor)             | GSLYST00003019001                       | Sema_plexin-like, Psi, IPT (full), IPT (partial), PTKc                           |                         |
| type10 | Type X RTKs: HGF (hepatocyte growth factor)             | GSLYST00003019001                       | IPT, IPT (partial), PTKc                                                         |                         |
| type10 | Type X RTKs: HGF (hepatocyte growth factor)             | GSLYST00003020001                       | IPT, IPT, IPT (partial), PTKc                                                    |                         |
| type10 | Type X RTKs: HGF (hepatocyte growth factor)             | GSLYST00003021001                       | IPT (partial) x3                                                                 | PTKc                    |
| type10 | Type X RTKs: HGF (hepatocyte growth factor)             | GSLYST00009000001to9004001              | SEMA, Psi, IPT, IPT (partial), PTKc_Met_Ron                                      |                         |
| type11 | Type XI RTKs: TAM (TYRO3-, AXL- and MER-TK)             | no match                                |                                                                                  |                         |
| type12 | Type XII RTKs: TIE family of angiopoietin receptors     | GSLYST00011095001                       | Ig, Ig, EGF (partial), EGF, PTKc(partial), PTKc(partial)                         | Ig, FNIII, FNIII, FNIII |
| type13 | Type XIII RTKs: Ephrin                                  | GSLYST00016855001                       | EphrinLBD, FNIII, FNIII, FNIII, PTKc-EPH, SAM                                    |                         |
| type14 | Type XIV RTKs: RET                                      | GSLYST00012958001+12959001              | PTKc_RET                                                                         | cadherin, cyst-rich     |
| type15 | Type XV RTKs: RYK                                       | GSLYST00007181001_extended              | PTKc-RYK, WIF                                                                    |                         |
| type16 | Type XVI RTKs: DDR (collagen receptor) family           | GSLYST00008779001                       | Discoidin, PTKc-DDR                                                              | Discoidin               |
| type17 | Type XVII RTKs: ROS receptors                           | GSLYST00009260001                       | FNIII, FNIII, FNIII, FNIII, PTKc_Ros                                             | YWTD propeller          |
| type18 | Type XVIII RTKs: LMR                                    | GSLYST00014169001                       | PTKc, TOMM_kin_cyc                                                               |                         |
| type19 | Type XIX RTKs: Leukocyte tyrosine kinase (LTK)          | GSLYST00020441001                       | PTKc_ALK_LTK                                                                     | Mam, Lda                |
| type20 | Type XX RTKs: STYK1                                     | GSLYST00018463001                       | PTKc_STYK                                                                        |                         |
