# Supplementary material for: The genome of the simultaneously hermaphroditic snail Lymnaea stagnalis reveals an evolutionary expansion of FMRFamide-like receptors
Source: PubMed Central journal article supplement — Sci Rep. 2024 Nov 25;14:29213. doi: 10.1038/s41598-024-78520-1 (PMC11589774; doi:10.1038/s41598-024-78520-1), 2024-11-25
Supplement: 41598_2024_78520_MOESM7_ESM.pdf [file 41598_2024_78520_MOESM7_ESM.pdf]

**ST10.** List of genes selected for the in situ expression study during *L. stagnalis* development. Expression in albumen gland and prostate from RNAseq data.

| Gene prediction              | Annotation                              | Expression in albumen gland | Expression in prostate |
|------------------------------|-----------------------------------------|-----------------------------|------------------------|
| GSLYST00001331001            | 7tmA_FMRFamide_R-like (6TM)             | 0                           | 19                     |
| GSLYST00016909001            | 7tmA_FMRFamide_R-like (7TM)             | 67                          | 0                      |
| GSLYST00019383001            | 7tmA_FMRFamide_R-like (6TM)             | 0                           | 10                     |
| GSLYST00019397001            | 7tmA_FMRFamide_R-like (6TM)             | 16                          | 0                      |
| GSLYST00001311001            | 2DBD-NR (NR7A)                          | 16                          | 9                      |
| GSLYST00003556001            | 2DBD-NR (NR7B)                          | 205                         | 183                    |
| GSLYST00008490001            | NR1B2 (RARB) (retinoic acid receptor)   | 0                           | 5                      |
| GSLYST00009627001&9626001ext | NR1C3 (PPARG) (retinoid X receptor)     | 0                           | 2                      |
| GSLYST00020139001_ALTORF     | NR2E3 (PNR) (photoreceptor specific NR) | 0                           | 1                      |
