# Supplementary material for: The genome of the simultaneously hermaphroditic snail Lymnaea stagnalis reveals an evolutionary expansion of FMRFamide-like receptors
Source: PubMed Central journal article supplement — Sci Rep. 2024 Nov 25;14:29213. doi: 10.1038/s41598-024-78520-1 (PMC11589774; doi:10.1038/s41598-024-78520-1), 2024-11-25
Supplement: 41598_2024_78520_MOESM8_ESM.pdf [file 41598_2024_78520_MOESM8_ESM.pdf]

**ST11.** Descriptive statistics of the various transcriptomic cDNA libraries used for the *L. stagnalis* genome annotation.

| Sample                        | Individual | Sample id | Nb of Reads | % reads assembled into contigs | Nb of Contigs | Mean Size | N50  |
|-------------------------------|------------|-----------|-------------|--------------------------------|---------------|-----------|------|
| <i>TruSeq libraries</i>       |            |           |             |                                |               |           |      |
| Stomach                       | Ind. 1     | BPP-AA    | 23M         | 93                             | 56527         | 916       | 1601 |
| Reproductive system           | Ind. 1     | BPP-AC    | 24M         | 94                             | 42958         | 776       | 1210 |
| Digestive gland 1             | Ind. 1     | BPP-AE    | 27M         | 94                             | 46760         | 856       | 1413 |
| Digestive gland 2             | Ind. 1     | BPP-AF    | 31M         | 95                             | 45656         | 807       | 1322 |
| Other (remaining body part) 1 | Ind. 1     | BPP-AH    | 25M         | 89                             | 60589         | 889       | 1469 |
| Other (remaining body part) 2 | Ind. 1     | BPP-AAI   | 28M         | 90                             | 65191         | 827       | 1341 |
| Digestive gland               | Ind. 2     | BPP-BA    | 20M         | 89                             | 54924         | 805       | 1293 |
| Ovotestis                     | Ind. 2     | BPP-BB    | 22M         | 92                             | 50809         | 864       | 1368 |
| Foot                          | Ind. 2     | BPP-BC    | 21M         | 93                             | 50364         | 952       | 1616 |
| Other (remaining) parts       | Ind. 2     | BPP-BD    | 27M         | 95                             | 46491         | 769       | 1157 |
| Stomach                       | Ind. 2     | BPP-BE    | 24M         | 94                             | 61347         | 102       | 1843 |
| <i>SMARTer libraries</i>      |            |           |             |                                |               |           |      |
| Neural ganglia (CNS)          | Ind. 1     | BPP-ABA   | 24M         | 89                             | 28576         | 1269      | 2227 |
| Head (mouth)                  | Ind. 1     | BPP-ADA   | 22M         | 88                             | 36413         | 1389      | 2472 |
| Mantel                        | Ind. 1     | BPP-AGB   | 23M         | 89                             | 35755         | 1371      | 2511 |
| Head (mouth)                  | Ind. 2     | BPP-BFB   | 29M         | 91                             | 33470         | 1386      | 2495 |
