# Supplementary material for: The genome of the simultaneously hermaphroditic snail Lymnaea stagnalis reveals an evolutionary expansion of FMRFamide-like receptors
Source: PubMed Central journal article supplement — Sci Rep. 2024 Nov 25;14:29213. doi: 10.1038/s41598-024-78520-1 (PMC11589774; doi:10.1038/s41598-024-78520-1), 2024-11-25
Supplement: 41598_2024_78520_MOESM9_ESM.pdf [file 41598_2024_78520_MOESM9_ESM.pdf]

**ST12.** Summary statistics of the Nanopore-sequenced cDNA libraries used to annotate the genome of *L.stagnalis* (raw vs NaS-corrected reads).

|                                 | # mapped reads<br>/<br>total read<br>number | Avg. % of<br>mapped<br>reads | # reads<br>> 1 kb | Avg.<br>identity<br>percent | Avg.<br>number of<br>exons per<br>alignment | %<br>GT/AC | %<br>GC/AG |
|---------------------------------|---------------------------------------------|------------------------------|-------------------|-----------------------------|---------------------------------------------|------------|------------|
| Nanopore<br>reads<br>(sample 1) | 105,718<br>/<br>179,614                     | 58.86%                       | 75,499            | 85.68%                      | 3.50                                        | 78.27%     | 10.00%     |
| Nanopore<br>reads<br>(sample 2) | 65,859<br>/<br>138,868                      | 47.43%                       | 98,273            | 85.42%                      | 3.71                                        | 80.14%     | 9.92%      |
| NaS reads<br>(sample 1)         | 123,374                                     | 98.58%                       | 49,587            | 99.69%                      | 4.92                                        | 95.96%     | 2.36%      |
| NaS reads<br>(sample 2)         | 81,383                                      | 93.32%                       | 41,484            | 99.65%                      | 4.98                                        | 95.95%     | 2.40%      |
