# Supplementary material for: The genome of the simultaneously hermaphroditic snail Lymnaea stagnalis reveals an evolutionary expansion of FMRFamide-like receptors
Source: PubMed Central journal article supplement — Sci Rep. 2024 Nov 25;14:29213. doi: 10.1038/s41598-024-78520-1 (PMC11589774; doi:10.1038/s41598-024-78520-1), 2024-11-25
Supplement: 41598_2024_78520_MOESM10_ESM.pdf [file 41598_2024_78520_MOESM10_ESM.pdf]

**ST13.** Genomic DNA library coverage, *L. stagnalis* genome project.

| Library                       | Sequencer | Fragment size | Read size | Coverage   |
|-------------------------------|-----------|---------------|-----------|------------|
| Short                         | MiSeq     | 400 bp        | 300 bp    | 2          |
| Short                         | HiSeq2500 | 600 bp        | 250 bp    | 39         |
| Short                         | MiSeq     | 700 bp        | 300 bp    | 10         |
| <b>Short library coverage</b> |           |               |           | <b>51</b>  |
| Long (manual sizing)          | HiSeq2000 | 3-5 kb        | 101 bp    | 24         |
| Long (SAGE-ELF)               | HiSeq2000 | 3 kb          | 101 bp    | 8          |
| Long (SAGE-ELF)               | HiSeq2000 | 4 kb          | 101 bp    | 9          |
| Long (SAGE-ELF)               | HiSeq2000 | 5 kb          | 101 bp    | 8          |
| Long (manual sizing)          | HiSeq2000 | 5-8 kb        | 101 bp    | 21         |
| Long (SAGE-ELF)               | HiSeq2000 | 6 kb          | 101 bp    | 9          |
| Long (SAGE-ELF)               | HiSeq2000 | 7 kb          | 101 bp    | 7          |
| Long (SAGE-ELF)               | HiSeq2000 | 8 kb          | 101 bp    | 8          |
| Long (manual sizing)          | HiSeq2000 | 8-11 kb       | 101 bp    | 18         |
| Long (SAGE-ELF)               | HiSeq2000 | 10 kb         | 101 bp    | 7          |
| Long (SAGE-ELF)               | HiSeq2000 | 15 kb         | 101 bp    | 6          |
| <b>Long read coverage</b>     |           |               |           | <b>125</b> |
