# Supplementary material for: The genome of the simultaneously hermaphroditic snail Lymnaea stagnalis reveals an evolutionary expansion of FMRFamide-like receptors
Source: PubMed Central journal article supplement — Sci Rep. 2024 Nov 25;14:29213. doi: 10.1038/s41598-024-78520-1 (PMC11589774; doi:10.1038/s41598-024-78520-1), 2024-11-25
Supplement: 41598_2024_78520_MOESM11_ESM.pdf [file 41598_2024_78520_MOESM11_ESM.pdf]

**ST14.** TE annotation of the *L. stagnalis* genome assembly.

|                                 | <i>1<sup>st</sup> de novo library</i><br>(all consensus sequences) | <i>2<sup>nd</sup> de novo library</i><br>(FLC consensus sequences) |
|---------------------------------|--------------------------------------------------------------------|--------------------------------------------------------------------|
| NTE20                           | 114763                                                             | 131723                                                             |
| LTE20                           | 773                                                                | 670                                                                |
| Consensus sequences             | 5085                                                               | 2643                                                               |
| informative consensus sequences | 5061                                                               | 2643                                                               |
| FLC consensus sequences         | 2643                                                               | 2604                                                               |
| FLF consensus sequences         | 2534                                                               | 2510                                                               |
| Copies                          | 1114023                                                            | 883147                                                             |
| FLC copies                      | 23211                                                              | 24190                                                              |
| FLF copies                      | 21865                                                              | 22621                                                              |
