# Supplementary material for: The genome of the simultaneously hermaphroditic snail Lymnaea stagnalis reveals an evolutionary expansion of FMRFamide-like receptors
Source: PubMed Central journal article supplement — Sci Rep. 2024 Nov 25;14:29213. doi: 10.1038/s41598-024-78520-1 (PMC11589774; doi:10.1038/s41598-024-78520-1), 2024-11-25
Supplement: 41598_2024_78520_MOESM12_ESM.pdf [file 41598_2024_78520_MOESM12_ESM.pdf]

**ST15.** Classification of transposable elements detected in the *L. stagnalis* genome assembly.

| Consensus classification                   | 1 <sup>st</sup> de novo library<br>(all consensus sequences) | 2 <sup>nd</sup> de novo library<br>(FLC consensus sequences) |
|--------------------------------------------|--------------------------------------------------------------|--------------------------------------------------------------|
| Consensus sequences                        | 5085                                                         | 2643                                                         |
| Class I TEs                                | 2428 (47.75%)                                                | 1517 (57.40%)                                                |
| Class II TEs                               | 1799 (35.38%)                                                | 774 (29.28%)                                                 |
| TEs unassigned to a class                  | 1 (0.02%)                                                    | 1 (0.04%)                                                    |
| PH (gene match)                            | 181 (3.56%)                                                  | 105 (3.97%)                                                  |
| noCat (no annotation, within Class I)      | 246 (4.83%)                                                  | 14 (0.53%)                                                   |
| Chimeric (annotated, other classification) | 631 (12.41%)                                                 | 232 (8.78%)                                                  |
