# Supplementary material for: The genome of the simultaneously hermaphroditic snail Lymnaea stagnalis reveals an evolutionary expansion of FMRFamide-like receptors
Source: PubMed Central journal article supplement — Sci Rep. 2024 Nov 25;14:29213. doi: 10.1038/s41598-024-78520-1 (PMC11589774; doi:10.1038/s41598-024-78520-1), 2024-11-25
Supplement: 41598_2024_78520_MOESM13_ESM.pdf [file 41598_2024_78520_MOESM13_ESM.pdf]

**ST16.** Primer sequences used to clone fragments for *in situ* hybridisation

| Accession         | Primer (5' – 3')               | Amplicon size (bp) |
|-------------------|--------------------------------|--------------------|
| GSLYST00008490001 | TCCAGTAACCATGGCAACAACG (Fwd)   | 964                |
|                   | ACAGGCCATTGGAAAACATGCAT (Rev)  |                    |
| GSLYST00009627001 | TTCCACTACGGGGTGCATTCTT (Fwd)   | 974                |
|                   | GCCTCTATGAGATTGGCCTGGA (Rev)   |                    |
| GSLYST00020139001 | CAGGACCAATGTGAGACGATGG (Fwd)   | 898                |
|                   | AGCACTCGTACAGCGTCTCGTG (Rev)   |                    |
| GSLYST00019397001 | AAGAGTCGGGGAGCCCTT (Fwd)       | 913                |
|                   | ATCCGGAACCAGGGCGAT (Rev)       |                    |
| GSLYST00016909001 | GCACAGGCTCTGTTCAGC (Fwd)       | 900                |
|                   | ATCCGATGGACCAAGTGGC (Rev)      |                    |
| GSLYST00019383001 | ATTGTCCACCTGGGGGCT (Fwd)       | 869                |
|                   | GTTCCGAGTGGGCCTTGG (Rev)       |                    |
| GSLYST00001331001 | TCCGACCTCTGCTGCTCT (Fwd)       | 857                |
|                   | TGAAGCAGCCAGGATTTGAAC (Rev)    |                    |
| GSLYST00000615001 | GCTCTTACAGCAGTCCTTGCAG (Fwd)   | 514                |
|                   | CGTAACCCTCGAAATATGGGCAGG (Rev) |                    |
| GSLYST00001311001 | CGCACTTGCCCCAGTAA (Fwd)        | 953                |
|                   | CTCTGGTTTGAGGGCCGG (Rev)       |                    |
| GSLYST00003556001 | ATCAGGAAATGGGTCACAGC (Fwd)     | 979                |
|                   | AGCAGGGTGGAGTCCCTAAT (Rev)     |                    |
