# Supplementary material for: The genome of the simultaneously hermaphroditic snail Lymnaea stagnalis reveals an evolutionary expansion of FMRFamide-like receptors
Source: PubMed Central journal article supplement — Sci Rep. 2024 Nov 25;14:29213. doi: 10.1038/s41598-024-78520-1 (PMC11589774; doi:10.1038/s41598-024-78520-1), 2024-11-25
Supplement: 41598_2024_78520_MOESM17_ESM.pdf [file 41598_2024_78520_MOESM17_ESM.pdf]

**ST2. Summary of nuclear receptor annotation:** BLASTp Best-Hit (BH) from *H. sapiens*-restricted or global nr NCBI database. Automatic protein predictions were manually modified where necessary (alternative ORF, combination of several gene predictions with obviously partial domains or other annotated regions, co-localised transcripts with a better annotation score, etc.). DNA- and Ligand-binding domains were identified with NCBI conserved domains database (CDD): presence/absence, completeness (full vs incomplete in N- or C-terminal region, Ninc and Cinc, respectively). Domain location and other detailed information are specified in Supplementary Table ST3. Abbreviation: <sup>P</sup> = predicted.

| <i>L. stagnalis</i><br>predicted protein                                           | Domain<br>(DBD,<br>LBD)            | Gene<br>abbreviation          | BH<br>accessio<br>n ( <i>H.</i><br><i>sapiens</i> ) | BH<br>accessio<br>n (nr) | BH gene name (nr)                                                     | BH taxon (nr)                      |
|------------------------------------------------------------------------------------|------------------------------------|-------------------------------|-----------------------------------------------------|--------------------------|-----------------------------------------------------------------------|------------------------------------|
| GSLYST00010242001ext                                                               | DBD full<br>no LBD                 | NR1A2 (THRB)                  | NP_00134<br>1643.1                                  | Q02965.2                 | Thyroid hormone<br>receptor beta                                      | <i>Lithobates<br/>catesbeianus</i> |
| GSLYST00002111001                                                                  | DBD full<br>LBD full               | NR1B2 (RARB)                  | NP_00127<br>7145.1                                  | XP_0130613<br>59.1       | <sup>P</sup> nuclear receptor<br>subfamily 1 group D<br>member 2-like | <i>B. glabrata</i>                 |
| GSLYST00008490001                                                                  | DBD full<br>LBD full               | NR1B2 (RARB)                  | NP_00127<br>7229.1                                  | ADF43963.1               | Retinoic acid receptor                                                | <i>L. stagnalis</i>                |
| GSLYST00009886001&G<br>SLYST00009887001                                            | DBD full<br>LBD full               | NR1B3 (RARG)                  | NP_00095<br>7.1                                     | KAH9519321<br>.1         | hypothetical protein<br>Btru_075258                                   | <i>B. truncatus</i>                |
| GSLYST00012932001                                                                  | DBD full<br>LBD full               | NR1C1<br>(PPARA)              | NP_00502<br>7.2                                     | XP_0130613<br>59.1       | <sup>P</sup> nuclear receptor<br>subfamily 1 group D<br>member 2-like | <i>B. glabrata</i>                 |
| GSLYST00020728001                                                                  | DBD full<br>LBD full               | NR1C1<br>(PPARA)              | NP_00502<br>7.2                                     | XP_0130889<br>59.1       | <sup>P</sup> uncharacterised protein<br>LOC106073033                  | <i>B. glabrata</i>                 |
| Lsta_scaffold719:49114.<br>.65797_ORF30<br>(same location as<br>GSLYST00019008001) | DBD full<br>no LBD                 | NR1C1<br>(PPARA)              | EAW7340<br>3.1                                      | XP_0051056<br>14.2       | Probable<br>serine/threonine-protein<br>kinase DDB_G0282963           | <i>A. californica</i>              |
| GSLYST00012709001                                                                  | DBD full<br>LBD full               | NR1C2<br>(PPARD)              | NP_00116<br>5290.1                                  | XP_0130941<br>06.1       | <sup>P</sup> retinoic acid receptor<br>beta-like                      | <i>B. glabrata</i>                 |
| GSLYST00008467001&<br>ORF2_EX9&10_bpp1E7<br>5_GALME.1.1                            | DBD full<br>LBD full               | NR1C3<br>(PPARG)              | NP_05695<br>3.2                                     | XP_0130727<br>95.1       | <sup>P</sup> ecdysone-inducible<br>protein E75-like                   | <i>B. glabrata</i>                 |
| GSLYST00009627001&<br>GSLYST00009626001ext                                         | DBD full<br>LBD full               | NR1C3<br>(PPARG)              | KAI25283<br>16.1                                    | KAH9498600<br>.1         | hypothetical protein<br>Btru_007742                                   | <i>B. truncatus</i>                |
| GSLYST00020475001                                                                  | DBD full<br>LBD full               | NR1C3<br>(PPARG)              | XP_01153<br>2145.1                                  | XP_0130789<br>73.1       | <sup>P</sup> uncharacterised protein<br>LOC106064881                  | <i>B. glabrata</i>                 |
| GSLYST00021345001                                                                  | DBD Ninc<br>LBD full               | NR1C3<br>(PPARG)              | NP_00502<br>8.4                                     | XP_0129353<br>01.1       | <sup>P</sup> ecdysone-induced<br>protein 78C-like                     | <i>A. californica</i>              |
| GSLYST00003246001                                                                  | DBD full<br>LBD full               | NR1D1<br>(REVERBA)            | NP_06837<br>0.1                                     | XP_0130788<br>93.1       | <sup>P</sup> nuclear receptor<br>subfamily 1 group D<br>member 1-like | <i>B. glabrata</i>                 |
| GSLYST00003376001                                                                  | DBD full<br>LBD full               | NR1D2<br>(REVERBB)            | NP_00113<br>8897.1                                  | XP_0130777<br>61.1       | <sup>P</sup> flocculation protein<br>FLO11-like                       | <i>B. glabrata</i>                 |
| GSLYST00005611001                                                                  | no DBD<br>LBD full                 | NR1D2<br>(REVERBB)            | NP_00113<br>8897.1                                  | XP_0130808<br>16.1       | <sup>P</sup> thyroid hormone<br>receptor alpha-like<br>isoform X2     | <i>B. glabrata</i>                 |
| GSLYST00003356001                                                                  | DBD1 full<br>DBD2 full<br>LBD full | NR1D2<br>(REVERBB)<br>2DBD-NR | NP_00113<br>8897.1                                  | XP_0130654<br>55.1       | <sup>P</sup> nuclear receptor<br>subfamily 1 group D<br>member 2-like | <i>B. glabrata</i>                 |
| GSLYST00002203001                                                                  | DBD full<br>LBD full               | NR1F1<br>(RORA)               | XP_011520<br>176.1                                  | XP_013063<br>338.1       | <sup>P</sup> nuclear receptor ROR-<br>beta-like isoform X3            | <i>B. glabrata</i>                 |
| GSLYST00003481001                                                                  | DBD full<br>LBD full               | NR1F1<br>(RORA)               | NP_599023<br>.1                                     | XP_005111<br>322.2       | <sup>P</sup> uncharacterised protein<br>LOC101857528                  | <i>A. californica</i>              |
| GSLYST00003724001                                                                  | DBD full<br>LBD full               | NR1F1<br>(RORA)               | XP_011520<br>176.1                                  | XP_005104<br>642.1       | <sup>P</sup> flocculation protein<br>FLO11-like isoform X1            | <i>A. californica</i>              |
| GSLYST00012703001                                                                  | DBD full<br>LBD full               | NR1F1<br>(RORA)               | XP_005254<br>641.1                                  | KAI878362<br>0.1         | Nuclear receptor ROR-<br>beta-like isoform X3                         | <i>B. glabrata</i>                 |
| GSLYST00007099001                                                                  | DBD full<br>LBD full               | NR1F2<br>(RORB)               | NP_008845<br>.2                                     | XP_013094<br>161.1       | <sup>P</sup> probable nuclear<br>hormone receptor HR3                 | <i>B. glabrata</i>                 |
| GSLYST00019331001                                                                  | DBD full<br>LBD full               | NR1F3<br>(RORC)               | NP_001001<br>523.1                                  | XP_012935<br>014.1       | <sup>P</sup> nuclear receptor ROR-<br>gamma-like                      | <i>A. californica</i>              |
| GSLYST00000602001                                                                  | DBD full<br>LBD full               | NR1H3<br>(LXRA)               | XP_011518<br>108.1                                  | XP_013079<br>217.1       | <sup>P</sup> nuclear hormone<br>receptor HR96-like<br>isoform X1      | <i>B. glabrata</i>                 |

## ST2 (cont.)

| <i>L. stagnalis</i> predicted protein                                                               | Domain (DBD, LBD)             | Gene abbreviation       | BH accession ( <i>H. sapiens</i> ) | BH accession (nr)  | BH gene name (nr)                                                          | BH taxon (nr)         |
|-----------------------------------------------------------------------------------------------------|-------------------------------|-------------------------|------------------------------------|--------------------|----------------------------------------------------------------------------|-----------------------|
| GSLYST00000926001                                                                                   | DBD full<br>LBD full          | NR1H3 (LXRA)            | NP_001123<br>574.1                 | RUS8288<br>9.1     | Hypothetical protein<br>EGW08_009354                                       | <i>E. chlorotica</i>  |
| GSLYST00003412001                                                                                   | DBD full<br>LBD full          | NR1H3 (LXRA)            | NP_001123<br>574.1                 | XP_0051<br>06455.2 | <sup>P</sup> nuclear hormone<br>receptor HR96-like                         | <i>A. californica</i> |
| GSLYST00019008001                                                                                   | no DBD<br>LBD full            | NR1H3 (LXRA)            | XP_011518<br>110.1                 | KAH9504<br>298.1   | Hypothetical protein<br>Btru_064571                                        | <i>B. truncatus</i>   |
| GSLYST00021927001                                                                                   | DBD full<br>LBD full          | NR1H4<br>(FXRA)         | NP_001193<br>922.1                 | XP_0129<br>40090.1 | <sup>P</sup> peroxisome proliferator-<br>activated receptor alpha-<br>like | <i>A. californica</i> |
| GSLYST00016253001                                                                                   | DBD full<br>LBD full          | NR1I1 (VDR)             | NP_000367<br>.1                    | XP_0130<br>74086.1 | <sup>P</sup> vitamin D3 receptor A-<br>like                                | <i>B. glabrata</i>    |
| GSLYST00020495001&<br>GSLYST00020494001ext                                                          | DBD full<br>LBD full          | NR1I1 (VDR)             | NP_000367<br>.1                    | XP_0130<br>73965.1 | <sup>P</sup> nuclear hormone<br>receptor HR96-like isoform<br>X1           | <i>B. glabrata</i>    |
| GSLYST00006772001                                                                                   | DBD full<br>LBD full          | NR2A1<br>(HNF4A)        | NP_001025<br>174.1                 | XP_0129<br>39974.1 | <sup>P</sup> hepatocyte nuclear factor<br>4-gamma-like                     | <i>A. californica</i> |
| GSLYST00014050001                                                                                   | DBD full<br>LBD full          | NR2B1<br>(RXRA)         | NP_002948<br>.1                    | Q5I7G2.1           | Retinoid X receptor<br>(LymRXR)                                            | <i>L. stagnalis</i>   |
| BPPAALocus_8214_Transcr<br>ipt_1/1_1/ORF17<br>(same location as<br>GSLYST00001311001)               | DBD1<br>DBD2 full<br>LBD full | NR2B2 (RXRB)<br>2DBD-NR | NP_001278<br>918.1                 | KAI87889<br>05.1   | Ecdysone-induced protein<br>75B, partial                                   | <i>B. glabrata</i>    |
| GSLYST00009203001                                                                                   | DBD full<br>LBD full          | NR2B3<br>(RXRG)         | NP_008848<br>.1                    | XP_0130<br>76268.1 | <sup>P</sup> retinoic acid receptor<br>RXR-alpha-B-like                    | <i>B. glabrata</i>    |
| GSLYST00005434001&74A<br>A&GSLYST00005433001                                                        | DBD full<br>LBD full          | NR2C2 (TR4)             | NP_001278<br>623.1                 | XP_0130<br>80569.1 | <sup>P</sup> orphan steroid hormone<br>receptor 2-like isoform X4          | <i>B. glabrata</i>    |
| GSLYST00007009001                                                                                   | DBD full<br>LBD Cinc          | NR2E1 (TLL)             | NP_003260<br>.1                    | XP_0130<br>64092.1 | <sup>P</sup> nuclear receptor<br>subfamily 2 group E<br>member 1-like      | <i>B. glabrata</i>    |
| GSLYST00012340001                                                                                   | DBD full<br>LBD full          | NR2E1 (TLL)             | NP_003260<br>.1                    | XP_0130<br>96601.1 | <sup>P</sup> nuclear receptor<br>subfamily 2 group E<br>member 1-like      | <i>B. glabrata</i>    |
| GSLYST00013111001&GSL<br>YST00013110001                                                             | DBD full<br>LBD full          | NR2E1 (TLL)             | NP_003260<br>.1                    | XP_0130<br>68647.1 | <sup>P</sup> nuclear receptor<br>subfamily 2 group E<br>member 1-like      | <i>B. glabrata</i>    |
| GSLYST00020139001_ALT<br>ORF                                                                        | DBD full<br>LBD full          | NR2E3 (PNR)             | NP_055064<br>.1                    | KAH9500<br>942.1   | Photoreceptor-specific<br>nuclear receptor                                 | <i>B. truncatus</i>   |
| GSLYST00022416001                                                                                   | DBD Ninc<br>no LBD            | NR2E3 (PNR)             | NP_057430<br>.1                    | XP_0130<br>71146.1 | <sup>P</sup> photoreceptor-specific<br>nuclear receptor-like               | <i>B. glabrata</i>    |
| GSLYST00018763001                                                                                   | no DBD<br>LBD full            | NR2F1<br>(COUP-TFI)     | NP_005645<br>.1                    | XP_0130<br>70030.1 | <sup>P</sup> photoreceptor-specific<br>nuclear receptor-like               | <i>B. glabrata</i>    |
| GSLYST00002895001                                                                                   | DBD full<br>LBD full          | NR2F2<br>(COUP-TFII)    | NP_066285<br>.1                    | XP_0130<br>80128.1 | <sup>P</sup> COUP transcription factor<br>2-like isoform X1                | <i>B. glabrata</i>    |
| GSLYST00006228001&GSL<br>YST00006227001&<br>GSLYST00006226001                                       | DBD full<br>LBD full          | NR3A1 (ESR1)            | NP_000116<br>.2                    | XP_0130<br>94385.1 | <sup>P</sup> probable nuclear<br>hormone receptor HR38                     | <i>B. glabrata</i>    |
| GSLYST00013137001                                                                                   | DBD full<br>LBD full          | NR3B1<br>(ERRA)         | XP_016872<br>802.1                 | XP_0130<br>84015.1 | <sup>P</sup> uncharacterised protein<br>LOC106069003                       | <i>B. glabrata</i>    |
| ORF5/bpp1T00019575001<br>/bpp1LOC100704106_ORE<br>NI.2.3<br>(same location as<br>GSLYST00020047001) | DBD full<br>LBD full          | NR3B3<br>(ERRG)         | XP_011507<br>576.1                 | XP_0130<br>80350.1 | <sup>P</sup> steroid hormone<br>receptor ERR2-like isoform<br>X2           | <i>B. glabrata</i>    |
| GSLYST00017058001                                                                                   | DBD Ninc<br>LBD full          | NR4A2<br>(NURR1)        | NP_006177<br>.1                    | XP_0090<br>45078.1 | Hypothetical protein<br>LOTGIDRAFT_136520,<br>partial                      | <i>L. gigantea</i>    |
| GSLYST00000165001                                                                                   | DBD full<br>LBD full          | NR5A2 (LRH1,<br>FTZ-F1) | NP_001263<br>393.1                 | XP_0130<br>68514.1 | <sup>P</sup> nuclear receptor<br>subfamily 5 group A<br>member 2-like      | <i>B. glabrata</i>    |
| GSLYST00015414001                                                                                   | DBD full<br>LBD full          | NR5A2 (LRH1,<br>FTZ-F1) | NP_003813<br>.1                    | XP_0130<br>64317.1 | <sup>P</sup> nuclear hormone<br>receptor FTZ-F1 beta-like                  | <i>B. glabrata</i>    |
| GSLYST00018899001&GSL<br>YST00018898001                                                             | DBD full<br>LBD full          | NR6A1<br>(GCNF)         | XP_005251<br>975.1                 | XP_0130<br>73570.1 | <sup>P</sup> hormone receptor 4-like<br>isoform X1                         | <i>B. glabrata</i>    |
