# Supplementary material for: The genome of the simultaneously hermaphroditic snail Lymnaea stagnalis reveals an evolutionary expansion of FMRFamide-like receptors
Source: PubMed Central journal article supplement — Sci Rep. 2024 Nov 25;14:29213. doi: 10.1038/s41598-024-78520-1 (PMC11589774; doi:10.1038/s41598-024-78520-1), 2024-11-25
Supplement: 41598_2024_78520_MOESM23_ESM.pdf [file 41598_2024_78520_MOESM23_ESM.pdf]

ST3. Annotation of *L. stagnalis* predicted proteins: nuclear receptor domains (DBD: DNA-binding domain; LBD: Ligand-binding domain).

| protein prediction | GP_identifier                                                              | DBD start | DBD end | DBD               | DBD_E-value | DBD_incomplete | LBD start | LBD end | LBD                 | LBD_E-value | LBD_incomplete | other domain start | other domain end | other domain   | other domain E-value | other domain incomplete | gene nomenclature |
|--------------------|----------------------------------------------------------------------------|-----------|---------|-------------------|-------------|----------------|-----------|---------|---------------------|-------------|----------------|--------------------|------------------|----------------|----------------------|-------------------------|-------------------|
| modified           | GSLYST00010242001extended                                                  | 13        | 86      | NR_DBD_like       | 6.44E-28    | -              | -         | -       | no LBD              | -           | no LBD         | -                  | -                | -              | -                    | -                       | NR1A2 (THRB)      |
| automatic          | GSLYST00002111001                                                          | 675       | 746     | NR_DBD_like       | 2.06E-31    | -              | 865       | 1040    | NR_LBD_F1           | 4.97E-22    | -              | -                  | -                | -              | -                    | -                       | NR1B2 (RARB)      |
| automatic          | GSLYST00008490001                                                          | 114       | 197     | NR_DBD_RAR        | 5.50E-55    | -              | 218       | 471     | NR_LBD_RAR          | 1.76E-104   | -              | -                  | -                | -              | -                    | -                       | NR1B2 (RARB)      |
| modified           | GSLYST00009886001&GSLYST00009887001                                        | 13        | 78      | NR_DBD_like       | 5.68E-39    | -              | 792       | 936     | NR_LBD superfamily  | 1.77E-19    | -              | -                  | -                | -              | -                    | -                       | NR1B3 (RARG)      |
| automatic          | GSLYST00012932001                                                          | 393       | 464     | NR_DBD_like       | 5.10E-31    | -              | 570       | 732     | NR_LBD_F1           | 1.31E-28    | -              | -                  | -                | -              | -                    | -                       | NR1C1 (PPARA)     |
| automatic          | GSLYST00020728001                                                          | 35        | 123     | NR_DBD_REV_ERB    | 8.29E-59    | -              | 210       | 381     | NR_LBD_REV_ERB      | 1.26E-71    | -              | 990                | 1294             | Med15          | 5.34E-05             | C                       | NR1C1 (PPARA)     |
| modified           | Lsta_scaffold719:49114..65797_ORF30 same location as GSLYS00019008001      | 160       | 231     | NR_DBD_like       | 4.16E-31    | -              | -         | -       | -                   | -           | no LBD         | -                  | -                | -              | -                    | -                       | NR1C1 (PPARA)     |
| modified           | Lsta_scaffold719:49114..65797_ORF30 same location as GSLYS00019008001      | 160       | 231     | NR_DBD_like       | 4.16E-31    | -              | -         | -       | -                   | -           | no LBD         | -                  | -                | -              | -                    | -                       | NR1C1 (PPARA)     |
| automatic          | GSLYST00012709001                                                          | 31        | 105     | NR_DBD_like       | 9.03E-34    | -              | 434       | 601     | NR_LBD_F1           | 1.27E-19    | -              | -                  | -                | -              | -                    | -                       | NR1C2 (PPARD)     |
| modified           | GSLYST00008467001&ORF2_EX9&10_bpp1E75_GAL ME.1.1                           | 35        | 113     | NR_DBD_REV_ERB    | 4.49E-41    | -              | 165       | 327     | NR_LBD_PPAR         | 1.77E-23    | -              | -                  | -                | -              | -                    | -                       | NR1C3 (PPARG)     |
| modified           | GSLYST00009627001&GSLYST00009626001ext                                     | 67        | 152     | NR_DBD_Ppar       | 1.83E-47    | -              | 222       | 394     | NR_LBD_F1           | 7.59E-21    | -              | -                  | -                | -              | -                    | -                       | NR1C3 (PPARG)     |
| automatic          | GSLYST00020475001                                                          | 32        | 103     | NR_DBD_like       | 3.33E-30    | -              | 484       | 634     | NR_LBD_Dme78_like   | 6.62E-19    | -              | -                  | -                | -              | -                    | -                       | NR1C3 (PPARG)     |
| automatic          | GSLYST00021345001                                                          | 2         | 38      | NR_DBD_Dme78_like | 3.26E-20    | N              | 121       | 313     | NR_LBD_Dme78_like   | 2.01E-82    | -              | -                  | -                | -              | -                    | -                       | NR1C3 (PPARG)     |
| automatic          | GSLYST00003246001                                                          | 18        | 89      | NR_DBD_like       | 4.35E-42    | -              | 437       | 609     | NR_LBD_F1           | 6.96E-43    | -              | -                  | -                | -              | -                    | -                       | NR1D1 (REVERBA)   |
| automatic          | GSLYST00003376001                                                          | 406       | 478     | NR_DBD_like       | 8.24E-39    | -              | 1089      | 1262    | NR_LBD_F1           | 2.15902E-49 | -              | 732                | 951              | T4SS_IcmE_DotG | 3.39E-16             | NC                      | NR1D2 (REVERBB)   |
| automatic          | GSLYST00003556001                                                          | 212       | 278     | 2DBD_NR_DBD1      | 3.62E-25    | -              | 867       | 1035    | NR_LBD_F1           | 9.84E-23    | -              | 298                | 373              | 2DBD_NR_DBD2   | 1.68E-32             | full                    | NR1D2 (REVERBB)   |
| automatic          | GSLYST00005611001                                                          | -         | -       | no DBD            | -           | no DBD         | 194       | 347     | NR_LBD_F1           | 9.66E-38    | -              | -                  | -                | -              | -                    | -                       | NR1D2 (REVERBB)   |
| automatic          | GSLYST00002203001                                                          | 21        | 92      | NR_DBD_like       | 3.34E-28    | -              | 480       | 648     | NR_LBD_F1           | 9.99E-22    | -              | 145                | 356              | Herpes_BLLF1   | 5.53E-05             | NC                      | NR1F1 (RORA)      |
| automatic          | GSLYST00003481001                                                          | 470       | 541     | NR_DBD_like       | 1.93E-28    | -              | 733       | 897     | NR_LBD_F1           | 3.64E-12    | -              | -                  | -                | -              | -                    | -                       | NR1F1 (RORA)      |
| automatic          | GSLYST00003724001                                                          | 20        | 93      | NR_DBD_like       | 6.55E-32    | -              | 764       | 927     | NR_LBD_F1           | 1.13E-18    | -              | -                  | -                | -              | -                    | -                       | NR1F1 (RORA)      |
| automatic          | GSLYST00012703001                                                          | 21        | 93      | NR_DBD_like       | 5.41E-36    | -              | 501       | 672     | NR_LBD_F1           | 1.97E-17    | -              | -                  | -                | -              | -                    | -                       | NR1F1 (RORA)      |
| automatic          | GSLYST00007099001                                                          | 91        | 184     | NR_DBD_ROR        | 3.92E-65    | -              | 272       | 508     | NR_LBD_ROR_like     | 8.86E-78    | -              | -                  | -                | -              | -                    | -                       | NR1F2 (RORB)      |
| automatic          | GSLYST00019331001                                                          | 22        | 93      | NR_DBD_like       | 6.95E-37    | -              | 368       | 537     | NR_LBD_F1           | 3.65E-30    | -              | -                  | -                | -              | -                    | -                       | NR1F3 (RORC)      |
| automatic          | GSLYST00000602001                                                          | 62        | 140     | NR_DBD_CAR        | 8.44E-42    | -              | 375       | 556     | NR_LBD_F1           | 1.60E-33    | -              | -                  | -                | -              | -                    | -                       | NR1H3 (LXRA)      |
| automatic          | GSLYST00000926001                                                          | 71        | 168     | NR_DBD_LXR        | 1.32E-46    | -              | 246       | 464     | NR_LBD_EcR          | 7.74E-69    | -              | -                  | -                | -              | -                    | -                       | NR1H3 (LXRA)      |
| automatic          | GSLYST00003412001                                                          | 96        | 188     | NR_DBD_CAR        | 2.00E-46    | -              | 254       | 432     | NR_LBD_F1           | 1.13E-34    | -              | -                  | -                | -              | -                    | -                       | NR1H3 (LXRA)      |
| automatic          | GSLYST00019008001                                                          | -         | -       | no DBD            | -           | no DBD         | 358       | 508     | NR_LBD_F1           | 3.78E-29    | -              | -                  | -                | -              | -                    | -                       | NR1H3 (LXRA)      |
| automatic          | GSLYST00021927001                                                          | 13        | 84      | NR_DBD_like       | 7.97E-34    | -              | 231       | 388     | NR_LBD_F1           | 1.89E-33    | -              | -                  | -                | -              | -                    | -                       | NR1H4 (FXRA)      |
| automatic          | GSLYST00016253001                                                          | 20        | 111     | NR_DBD_CAR        | 2.10E-42    | -              | 259       | 447     | NR_LBD_F1           | 1.17E-40    | -              | -                  | -                | -              | -                    | -                       | NR1I1 (VDR)       |
| modified           | GSLYST00020495001&GSLYST00020494001ext                                     | 58        | 151     | NR_DBD_CAR        | 5.27E-45    | -              | 258       | 431     | NR_LBD_F1           | 1.11E-25    | -              | -                  | -                | -              | -                    | -                       | NR1I1 (VDR)       |
| automatic          | GSLYST00006772001                                                          | 151       | 226     | NR_DBD_HNF4A      | 3.29E-48    | -              | 245       | 468     | NR_LBD_HNF4_like    | 3.63E-128   | -              | -                  | -                | -              | -                    | -                       | NR2A1 (HNF4A)     |
| automatic          | GSLYST00014050001                                                          | 174       | 253     | NR_DBD_RXR        | 6.66E-54    | -              | 273       | 476     | NR_LBD_RXR_like     | 2.69E-152   | -              | 98                 | 171              | Nuc_recep-AF1  | 0.0028077            | C                       | NR2B1 (RXRA)      |
| modified           | BPPAALocus_8214_Transcript_1/1_1/ORF17/ same location as GSLYST00001311001 | 189       | 268     | 2DBD_NR_DBD1      | 8.47E-21    | -              | 1145      | 1313    | NR_LBD_F1           | 7.10774E-13 | -              | 275                | 348              | 2DBD_NR_DBD2   | 4.473E-30            | -                       | NR2B2 (RXRB)      |
| automatic          | GSLYST00009203001                                                          | 113       | 196     | NR_DBD_TR         | 3.74E-48    | -              | 259       | 466     | NR_LBD_Nurrr1_like  | 3.25E-41    | -              | -                  | -                | -              | -                    | -                       | NR2B3 (RXRG)      |
| modified           | GSLYST00005434001&74AA&GSLYST00005433001                                   | 152       | 238     | NR_DBD_TR2_like   | 1.03E-54    | -              | 426       | 647     | NR_LBD_TR2_like     | 3.86E-103   | -              | -                  | -                | -              | -                    | -                       | NR2C2 (TR4)       |
| automatic          | GSLYST00007009001                                                          | 2         | 82      | NR_DBD_PNR_like_2 | 8.88E-50    | -              | 143       | 188     | NR_LBD_F2           | 2.32E-10    | C              | -                  | -                | -              | -                    | -                       | NR2E1 (TLL)       |
| automatic          | GSLYST00012340001                                                          | 11        | 103     | NR_DBD_TLX        | 1.06E-64    | -              | 185       | 377     | NR_LBD_Tlx_PNR_like | 7.74E-60    | -              | -                  | -                | -              | -                    | -                       | NR2E1 (TLL)       |
| modified           | GSLYST00013111001&GSLYST00013110001                                        | 10        | 59      | NR_DBD_TLX        | 3.80E-24    | -              | 121       | 325     | NR_LBD_Tlx_PNR_like | 5.57E-104   | -              | -                  | -                | -              | -                    | -                       | NR2E1 (TLL)       |
| modified           | GSLYST00020139_altORF                                                      | 1         | 85      | NR_DBD_PNR        | 1.44E-62    | -              | 141       | 357     | NR_LBD_Tlx_PNR_like | 5.2571E-107 | -              | -                  | -                | -              | -                    | -                       | NR2E3 (PNR)       |
| automatic          | GSLYST00022416001                                                          | 3         | 20      | NR_DBD_PNR        | 0.000114548 | N              | -         | -       | no LBD              | -           | no LBD         | -                  | -                | -              | -                    | -                       | NR2E3 (PNR)       |
| automatic          | GSLYST00018763001                                                          | -         | -       | no DBD            | -           | no DBD         | 321       | 470     | NR_LBD_F2           | 5.00E-31    | -              | -                  | -                | -              | -                    | -                       | NR2F1 (COUP-TFI)  |
