# Supplementary material for: The genome of the simultaneously hermaphroditic snail Lymnaea stagnalis reveals an evolutionary expansion of FMRFamide-like receptors
Source: PubMed Central journal article supplement — Sci Rep. 2024 Nov 25;14:29213. doi: 10.1038/s41598-024-78520-1 (PMC11589774; doi:10.1038/s41598-024-78520-1), 2024-11-25
Supplement: 41598_2024_78520_MOESM25_ESM.pdf [file 41598_2024_78520_MOESM25_ESM.pdf]

ST5. Annotation of *L. stagnalis* predicted proteins: GPCRs.

| gp                 | Hit type     | PSSM-ID | From | To  | E-Value     | Bitscore | Accession | Short name                                 | Incomplete | Superfamily | class   |
|--------------------|--------------|---------|------|-----|-------------|----------|-----------|--------------------------------------------|------------|-------------|---------|
| GSLYST000017491001 | superfamily  | 333717  | 12   | 152 | 4.89E-05    | 44.7022  | cd128897  | 7tm_GPCRs superfamily                      | C          | -           | Class_? |
| GSLYST00000030001  | specific     | 320187  | 25   | 388 | 7.79E-110   | 322.755  | cd15059   | 7tmA_alpha2_AR                             | -          | cd128897    | Class_A |
| GSLYST00000030001  | non-specific | 222976  | 25   | 209 | 2.50E-12    | 67.1106  | PHAO3087  | 7tmA_alpha2_AR                             | C          | cd127963    | Class_A |
| GSLYST00000010001  | specific     | 320194  | 34   | 337 | 1.46E-166   | 466.468  | cd15066   | 7tmA_DmOct-betaAR-like                     | -          | cd128897    | Class_A |
| GSLYST00000010001  | non-specific | 222976  | 41   | 343 | 8.63E-19    | 86.3706  | PHAO3087  | 7tmA_alpha2_AR                             | -          | cd127963    | Class_A |
| GSLYST00000017001  | non-specific | 320190  | 3    | 330 | 1.23E-107   | 314.812  | cd15062   | 7tmA_alpha1_AR                             | -          | cd128897    | Class_A |
| GSLYST00000017001  | non-specific | 222976  | 5    | 326 | 3.89E-12    | 65.955   | PHAO3087  | 7tmA_alpha1_AR                             | -          | cd127963    | Class_A |
| GSLYST00000031001  | non-specific | 313540  | 38   | 175 | 0.000157492 | 42.5613  | pfam10328 | 7TM_GPCR_Srx                               | C          | cd121561    | Class_A |
| GSLYST00000031001  | non-specific | 320109  | 34   | 186 | 1.65E-12    | 66.8876  | cd14978   | 7tmA_FMRFamide_R-like                      | C          | cd128897    | Class_A |
| GSLYST00000031001  | non-specific | 165021  | 38   | 174 | 3.22E-07    | 51.5526  | PHAO2638  | 7TM_GPCR_Srx                               | NC         | cd127963    | Class_A |
| GSLYST00000032001  | non-specific | 255903  | 2    | 288 | 0.000392063 | 40.6547  | pfam10320 | 7TM_GPCR_Srx                               | -          | cd121561    | Class_A |
| GSLYST00000032001  | non-specific | 320109  | 1    | 288 | 1.99E-17    | 80.3696  | cd14978   | 7tmA_FMRFamide_R-like                      | -          | cd128897    | Class_A |
| GSLYST00000034001  | non-specific | 320109  | 3    | 303 | 4.07E-11    | 62.2652  | cd14978   | 7tmA_FMRFamide_R-like                      | -          | cd128897    | Class_A |
| GSLYST00000035001  | non-specific | 320109  | 3    | 307 | 6.29E-12    | 64.9616  | cd14978   | 7tmA_FMRFamide_R-like                      | -          | cd128897    | Class_A |
| GSLYST00000036001  | non-specific | 313536  | 2    | 311 | 5.31E-07    | 50.2884  | pfam10324 | 7TM_GPCR_Srx                               | -          | cd121561    | Class_A |
| GSLYST00000036001  | non-specific | 320109  | 3    | 307 | 1.19E-14    | 72.6656  | cd14978   | 7tmA_FMRFamide_R-like                      | -          | cd128897    | Class_A |
| GSLYST00000037001  | non-specific | 320109  | 3    | 297 | 2.78E-15    | 74.2064  | cd14978   | 7tmA_FMRFamide_R-like                      | -          | cd128897    | Class_A |
| GSLYST00000037001  | non-specific | 313540  | 85   | 134 | 0.00439945  | 37.9389  | pfam10328 | 7TM_GPCR_Srx                               | NC         | cd121561    | Class_A |
| GSLYST00000038001  | non-specific | 320109  | 3    | 240 | 6.00E-11    | 60.7244  | cd14978   | 7tmA_FMRFamide_R-like                      | -          | cd128897    | Class_A |
| GSLYST00000039001  | non-specific | 313536  | 1    | 302 | 0.000366757 | 41.4288  | pfam10324 | 7TM_GPCR_Srx                               | -          | cd121561    | Class_A |
| GSLYST00000039001  | non-specific | 320109  | 1    | 302 | 1.89E-14    | 71.8952  | cd14978   | 7tmA_FMRFamide_R-like                      | -          | cd128897    | Class_A |
| GSLYST00000054001  | non-specific | 320109  | 14   | 278 | 7.05E-16    | 75.7472  | cd14978   | 7tmA_FMRFamide_R-like                      | -          | cd128897    | Class_A |
| GSLYST00000055001  | non-specific | 320109  | 11   | 217 | 4.53E-15    | 71.8952  | cd14978   | 7tmA_FMRFamide_R-like                      | N          | cd128897    | Class_A |
| GSLYST00000057001  | non-specific | 320109  | 23   | 239 | 2.37E-13    | 68.0432  | cd14978   | 7tmA_FMRFamide_R-like                      | N          | cd128897    | Class_A |
| GSLYST00000058001  | non-specific | 320109  | 7    | 229 | 5.72E-09    | 55.7168  | cd14978   | 7tmA_FMRFamide_R-like                      | C          | cd128897    | Class_A |
| GSLYST00000079001  | non-specific | 320109  | 6    | 272 | 2.10E-13    | 68.4284  | cd14978   | 7tmA_FMRFamide_R-like                      | -          | cd128897    | Class_A |
| GSLYST00000082001  | non-specific | 320109  | 7    | 212 | 8.88E-15    | 71.1248  | cd14978   | 7tmA_FMRFamide_R-like                      | N          | cd128897    | Class_A |
| GSLYST00000083001  | non-specific | 320109  | 1    | 290 | 2.47E-26    | 105.022  | cd14978   | 7tmA_FMRFamide_R-like                      | -          | cd128897    | Class_A |
| GSLYST00000156001  | non-specific | 320109  | 41   | 330 | 2.88E-29    | 114.652  | cd14978   | 7tmA_FMRFamide_R-like                      | -          | cd128897    | Class_A |
| GSLYST00000156001  | non-specific | 222976  | 40   | 229 | 2.71E-06    | 48.621   | PHAO3087  | 7tm_GPCRs superfamily                      | C          | cd127963    | Class_A |
| GSLYST00000196001  | superfamily  | 333717  | 13   | 308 | 2.17E-82    | 250.67   | cd128897  | 7tm_GPCRs superfamily                      | -          | -           | Class_A |
| GSLYST00000196001  | non-specific | 320128  | 13   | 308 | 2.17E-82    | 250.67   | cd14997   | 7tmA_ETH-R                                 | -          | cd128897    | Class_A |
| GSLYST00000196001  | non-specific | 222976  | 44   | 312 | 2.32E-12    | 66.3402  | PHAO3087  | 7tmA_ETH-R                                 | N          | cd127963    | Class_A |
| GSLYST00000205001  | non-specific | 320109  | 1    | 264 | 1.50E-19    | 86.1476  | cd14978   | 7tmA_FMRFamide_R-like                      | -          | cd128897    | Class_A |
| GSLYST00000246001  | non-specific | 313536  | 1    | 298 | 0.000191395 | 42.1992  | pfam10324 | 7TM_GPCR_Srx                               | -          | cd121561    | Class_A |
| GSLYST00000246001  | non-specific | 320109  | 1    | 291 | 5.90E-30    | 114.652  | cd14978   | 7tmA_FMRFamide_R-like                      | -          | cd128897    | Class_A |
| GSLYST00000247001  | non-specific | 320086  | 17   | 127 | 1.33E-07    | 48.8108  | cd00637   | 7tm_classA_rhodopsin-like                  | C          | cd128897    | Class_A |
| GSLYST00000248001  | non-specific | 320109  | 3    | 120 | 1.66E-09    | 53.7908  | cd14978   | 7tmA_FMRFamide_R-like                      | -          | cd128897    | Class_A |
| GSLYST00000254001  | non-specific | 313536  | 2    | 279 | 0.00790323  | 36.8064  | pfam10324 | 7TM_GPCR_Srx                               | -          | cd121561    | Class_A |
| GSLYST00000254001  | non-specific | 320109  | 1    | 279 | 1.31E-23    | 96.9332  | cd14978   | 7tmA_FMRFamide_R-like                      | -          | cd128897    | Class_A |
| GSLYST00000255001  | non-specific | 320109  | 15   | 148 | 7.91E-06    | 44.1608  | cd14978   | 7tmA_FMRFamide_R-like                      | N          | cd128897    | Class_A |
| GSLYST00000256001  | non-specific | 320109  | 1    | 285 | 8.89E-23    | 95.0072  | cd14978   | 7tmA_FMRFamide_R-like                      | -          | cd128897    | Class_A |
| GSLYST00000279001  | specific     | 320086  | 46   | 399 | 4.98E-28    | 111.598  | cd00637   | 7tm_classA_rhodopsin-like                  | -          | cd128897    | Class_A |
| GSLYST00000314001  | non-specific | 320109  | 13   | 218 | 2.44E-15    | 73.8212  | cd14978   | 7tmA_FMRFamide_R-like                      | N          | cd128897    | Class_A |
| GSLYST00000329001  | non-specific | 320112  | 2    | 276 | 1.78E-34    | 133.14   | cd14981   | 7tmA_Prostanoid_R                          | -          | cd128897    | Class_A |
| GSLYST00000339001  | non-specific | 320132  | 72   | 263 | 1.75E-42    | 146.267  | cd15001   | 7tmA_GPRna14-like                          | C          | cd128897    | Class_A |
| GSLYST00000339001  | non-specific | 222976  | 51   | 268 | 4.47E-16    | 76.7406  | PHAO3087  | 7tmA_GPRna14-like                          | C          | cd127963    | Class_A |
| GSLYST00000340001  | non-specific | 320132  | 1    | 68  | 2.64E-12    | 61.1377  | cd15001   | 7tmA_GPRna14-like                          | N          | cd128897    | Class_A |
| GSLYST00000395001  | specific     | 320086  | 6    | 159 | 3.43E-21    | 86.5604  | cd00637   | 7tm_classA_rhodopsin-like                  | C          | cd128897    | Class_A |
| GSLYST00000395001  | non-specific | 222976  | 3    | 119 | 9.96E-05    | 40.9171  | PHAO3087  | 7tm_classA_rhodopsin-like                  | C          | cd127963    | Class_A |
| GSLYST00000443001  | non-specific | 320331  | 39   | 317 | 8.64E-45    | 154.685  | cd15203   | 7tmA_NPYR-like                             | -          | cd128897    | Class_A |
| GSLYST00000443001  | non-specific | 222976  | 51   | 145 | 1.30E-06    | 49.3914  | PHAO3087  | 7tmA_NPYR-like                             | C          | cd127963    | Class_A |
| GSLYST00000558001  | non-specific | 320098  | 25   | 158 | 4.71E-20    | 89.5444  | cd14967   | 7tmA_amine_R-like                          | C          | cd128897    | Class_A |
| GSLYST00000558001  | non-specific | 320182  | 409  | 475 | 1.07E-06    | 50.1878  | cd15054   | 7tmA_5-HT6                                 | N          | cd128897    | Class_A |
| GSLYST00000558001  | non-specific | 165021  | 29   | 149 | 0.00378418  | 39.6114  | PHAO2638  | 7tmA_5-HT6                                 | NC         | cd127963    | Class_A |
| GSLYST00000628001  | non-specific | 320109  | 5    | 270 | 1.43E-19    | 86.1476  | cd14978   | 7tmA_FMRFamide_R-like                      | -          | cd128897    | Class_A |
| GSLYST00000661001  | non-specific | 320109  | 15   | 310 | 8.04E-14    | 70.3544  | cd14978   | 7tmA_FMRFamide_R-like                      | -          | cd128897    | Class_A |
| GSLYST00000751001  | non-specific | 320086  | 8    | 64  | 3.91E-05    | 44.1884  | cd00637   | 7tm_classA_rhodopsin-like                  | C          | cd128897    | Class_A |
| GSLYST00000801001  | non-specific | 320109  | 1    | 306 | 1.89E-08    | 54.5612  | cd14978   | 7tmA_FMRFamide_R-like                      | -          | cd128897    | Class_A |
| GSLYST00000803001  | non-specific | 320109  | 27   | 338 | 9.77E-09    | 55.7168  | cd14978   | 7tmA_FMRFamide_R-like                      | -          | cd128897    | Class_A |
| GSLYST00000803001  | non-specific | 313540  | 32   | 231 | 0.000317006 | 41.7909  | pfam10328 | 7TM_GPCR_Srx                               | C          | cd121561    | Class_A |
| GSLYST00000804001  | non-specific | 320109  | 6    | 289 | 3.15E-12    | 65.3468  | cd14978   | 7tmA_FMRFamide_R-like                      | -          | cd128897    | Class_A |
| GSLYST00000806001  | non-specific | 320109  | 27   | 338 | 1.67E-14    | 73.0508  | cd14978   | 7tmA_FMRFamide_R-like                      | -          | cd128897    | Class_A |
| GSLYST00000806001  | non-specific | 313540  | 32   | 227 | 0.00106879  | 39.8649  | pfam10328 | 7TM_GPCR_Srx                               | C          | cd121561    | Class_A |
| GSLYST00000919001  | non-specific | 320086  | 37   | 138 | 6.21E-06    | 48.4256  | cd00637   | 7tm_classA_rhodopsin-like                  | C          | cd128897    | Class_A |
| GSLYST00000919001  | non-specific | 223633  | 28   | 128 | 0.00239896  | 40.2328  | COG0559   | LivH                                       | C          | cd100454    | Class_A |
| GSLYST00000919001  | superfamily  | 320981  | 28   | 128 | 0.00239896  | 40.2328  | cd00454   | TM_PBP1_branched-chain-AA_like superfamily | C          | -           | Class_A |
| GSLYST00000981001  | non-specific | 320124  | 6    | 257 | 4.57E-11    | 61.4612  | cd14993   | 7tmA_CCKR-like                             | N          | cd128897    | Class_A |
| GSLYST00000982001  | non-specific | 320109  | 16   | 76  | 0.000265815 | 37.9977  | cd14978   | 7tmA_FMRFamide_R-like                      | C          | cd128897    | Class_A |
| GSLYST00000983001  | non-specific | 320109  | 44   | 386 | 5.14E-19    | 86.5328  | cd14978   | 7tmA_FMRFamide_R-like                      | -          | cd128897    | Class_A |
| GSLYST00001128001  | non-specific | 320109  | 21   | 324 | 2.83E-25    | 103.096  | cd14978   | 7tmA_FMRFamide_R-like                      | -          | cd128897    | Class_A |
| GSLYST00001152001  | specific     | 320086  | 86   | 371 | 9.37E-56    | 185.171  | cd00637   | 7tm_classA_rhodopsin-like                  | -          | cd128897    | Class_A |
| GSLYST00001152001  | non-specific | 222976  | 86   | 382 | 9.44E-10    | 59.4066  | PHAO3087  | 7tm_classA_rhodopsin-like                  | -          | cd127963    | Class_A |
| GSLYST00001155001  | specific     | 320086  | 11   | 312 | 4.16E-52    | 172.845  | cd00637   | 7tm_classA_rhodopsin-like                  | -          | cd128897    | Class_A |
| GSLYST00001155001  | non-specific | 222976  | 8    | 210 | 3.13E-10    | 60.177   | PHAO3087  | 7tm_classA_rhodopsin-like                  | C          | cd127963    | Class_A |
| GSLYST00001159001  | non-specific | 320504  | 60   | 376 | 1.56E-123   | 358.932  | cd15382   | 7tmA_AKHR                                  | -          | cd128897    | Class_A |
| GSLYST00001159001  | non-specific | 222976  | 63   | 382 | 2.27E-17    | 82.1334  | PHAO3087  | 7tmA_AKHR                                  | -          | cd127963    | Class_A |
| GSLYST00001165001  | specific     | 320109  | 68   | 359 | 2.46E-85    | 263.725  | cd14978   | 7tmA_FMRFamide_R-like                      | -          | cd128897    | Class_A |
| GSLYST00001165001  | non-specific | 222976  | 72   | 363 | 5.76E-09    | 57.0954  | PHAO3087  | 7tmA_FMRFamide_R-like                      | -          | cd127963    | Class_A |
| GSLYST00001309001  | non-specific | 313536  | 9    | 274 | 1.34E-07    | 51.444   | pfam10324 | 7TM_GPCR_Srx                               | -          | cd121561    | Class_A |
| GSLYST00001309001  | non-specific | 320109  | 9    | 276 | 1.29E-18    | 83.4512  | cd14978   | 7tmA_FMRFamide_R-like                      | -          | cd128897    | Class_A |
| GSLYST00001318001  | non-specific | 320109  | 6    | 303 | 4.21E-28    | 110.03   | cd14978   | 7tmA_FMRFamide_R-like                      | -          | cd128897    | Class_A |
| GSLYST00001318001  | non-specific | 313536  | 150  | 310 | 1.16E-09    | 58.3776  | pfam10324 | 7TM_GPCR_Srx                               | N          | cd121561    | Class_A |
| GSLYST00001330001  | non-specific | 313536  | 4    | 269 | 0.000715513 | 40.2732  | pfam10324 | 7TM_GPCR_Srx                               | -          | cd121561    | Class_A |
| GSLYST00001330001  | non-specific | 320109  | 4    | 271 | 4.63E-15    | 73.0508  | cd14978   | 7tmA_FMRFamide_R-like                      | -          | cd128897    | Class_A |
| GSLYST00001331001  | non-specific | 320109  | 6    | 273 | 8.04E-17    | 78.0584  | cd14978   | 7tmA_FMRFamide_R-like                      | -          | cd128897    | Class_A |
| GSLYST00001332001  | non-specific | 320086  | 59   | 231 | 4.91E-05    | 44.1884  | cd00637   | 7tm_classA_rhodopsin-like                  | C          | cd126897    | Class_A |
| GSLYST00001365001  | specific     | 314141  | 109  | 138 | 0.00577066  | 34.3129  | pfam11137 | DUF2909                                    | -          | cd126897    | Class_A |
| GSLYST00001365001  | non-specific | 320610  | 92   | 182 | 0.00909023  | 36.6862  | cd15944   | 7tmA_OR5AR1-like                           | N          | cd128897    | Class_A |
| GSLYST00001512001  | non-specific | 320506  | 1    | 319 | 4.80E-121   | 353.666  | cd15384   | 7tmA_GnRHR_invertebrate                    | -          | cd128897    | Class_A |
| GSLYST00001512001  | non-specific | 165021  | 1    | 311 | 2.63E-06    | 49.2414  | PHAO2638  | 7tmA_GnRHR_invertebrate                    | N          | cd127963    | Class_A |
| GSLYST00001538001  | non-specific | 320504  | 1    | 155 | 1.77E-83    | 247.224  | cd15382   | 7tmA_AKHR                                  | N          | cd128897    | Class_A |
| GSLYST00001538001  | non-specific | 222976  | 88   | 154 | 0.00338703  | 36.2947  | PHAO3087  | 7tmA_AKHR                                  | N          | cd127963    | Class_A |
| GSLYST00001539001  | non-specific | 320504  | 22   | 155 | 8.22E-64    | 197.148  | cd15382   | 7tmA_AKHR                                  | C          | cd128897    | Class_A |
| GSLYST00001539001  |              |         |      |     |             |          |           |                                            |            |             |         |

|                   |              |        |     |     |             |         |           |                                       |    |         |         |
|-------------------|--------------|--------|-----|-----|-------------|---------|-----------|---------------------------------------|----|---------|---------|
| GSLYST00002054001 | non-specific | 320140 | 55  | 250 | 3.89E-60    | 199.207 | cd15012   | 7tmA_Trissin_R                        | C  | cl28897 | Class_A |
| GSLYST00002054001 | non-specific | 222976 | 52  | 255 | 2.47E-17    | 82.9038 | PHAO3087  | PHAO3087                              | C  | cl27963 | Class_A |
| GSLYST00002054001 | non-specific | 320245 | 442 | 501 | 0.00020278  | 43.184  | cd15117   | 7tmA_FPR-like                         | N  | cl28897 | Class_A |
| GSLYST00002083001 | non-specific | 313536 | 5   | 294 | 5.60E-06    | 46.8216 | pfam10324 | 7TM_GPCR_Srw                          | -  | cl21561 | Class_A |
| GSLYST00002083001 | non-specific | 320109 | 5   | 300 | 7.01E-19    | 84.6068 | cd14978   | 7tmA_FMRFamide_R-like                 | -  | cl28897 | Class_A |
| GSLYST00002125001 | non-specific | 320098 | 3   | 248 | 2.04E-41    | 141.932 | cd14967   | 7tmA_amine_R-like                     | -  | cl28897 | Class_A |
| GSLYST00002125001 | non-specific | 222976 | 28  | 213 | 1.67E-05    | 44.769  | PHAO3087  | PHAO3087                              | NC | cl27963 | Class_A |
| GSLYST00002127001 | non-specific | 320098 | 1   | 248 | 1.28E-51    | 168.125 | cd14967   | 7tmA_amine_R-like                     | -  | cl28897 | Class_A |
| GSLYST00002127001 | non-specific | 222976 | 4   | 216 | 6.98E-07    | 49.0062 | PHAO3087  | PHAO3087                              | N  | cl27963 | Class_A |
| GSLYST00002153001 | non-specific | 320454 | 96  | 159 | 4.40E-34    | 120.151 | cd15331   | 7tmA_5HT1A_invertebrates              | C  | cl28897 | Class_A |
| GSLYST00002154001 | non-specific | 320513 | 1   | 22  | 1.88E-05    | 44.4279 | cd15391   | 7tmA_NPR-like_invertebrate            | N  | cl28897 | Class_A |
| GSLYST00002193001 | non-specific | 320331 | 1   | 216 | 2.90E-68    | 212.465 | cd15203   | 7tmA_NPYR-like                        | N  | cl28897 | Class_A |
| GSLYST00002193001 | non-specific | 222976 | 1   | 232 | 0.000231647 | 41.6874 | PHAO3087  | PHAO3087                              | N  | cl27963 | Class_A |
| GSLYST00002219001 | specific     | 320086 | 35  | 245 | 3.70E-28    | 113.524 | cd00637   | 7tm_classA_rhodopsin-like             | C  | cl28897 | Class_A |
| GSLYST00002219001 | non-specific | 320086 | 447 | 532 | 2.93E-08    | 54.974  | cd00637   | 7tm_classA_rhodopsin-like             | N  | cl28897 | Class_A |
| GSLYST00002219001 | non-specific | 165021 | 35  | 167 | 0.000121507 | 44.619  | PHAO2638  | PHAO2638                              | NC | cl27963 | Class_A |
| GSLYST00002277001 | non-specific | 320132 | 1   | 262 | 9.65E-76    | 231.781 | cd15001   | 7tmA_GPRnna14-like                    | N  | cl28897 | Class_A |
| GSLYST00002277001 | non-specific | 222976 | 3   | 258 | 5.74E-11    | 62.103  | PHAO3087  | PHAO3087                              | N  | cl27963 | Class_A |
| GSLYST00002394001 | specific     | 320324 | 71  | 402 | 2.89E-152   | 432.814 | cd15196   | 7tmA_Vasopressin_Oxytocin             | -  | cl28897 | Class_A |
| GSLYST00002394001 | non-specific | 222976 | 65  | 398 | 1.39E-11    | 65.1846 | PHAO3087  | PHAO3087                              | -  | cl27963 | Class_A |
| GSLYST00002484001 | non-specific | 313536 | 8   | 308 | 1.34E-09    | 57.9924 | pfam10324 | 7TM_GPCR_Srw                          | -  | cl21561 | Class_A |
| GSLYST00002484001 | non-specific | 320109 | 4   | 301 | 4.13E-25    | 101.941 | cd14978   | 7tmA_FMRFamide_R-like                 | -  | cl28897 | Class_A |
| GSLYST00002484001 | non-specific | 165021 | 8   | 69  | 0.0056634   | 38.0706 | PHAO2638  | PHAO2638                              | NC | cl27963 | Class_A |
| GSLYST00002485001 | non-specific | 313536 | 8   | 305 | 4.76E-08    | 53.37   | pfam10324 | 7TM_GPCR_Srw                          | -  | cl21561 | Class_A |
| GSLYST00002485001 | non-specific | 320109 | 4   | 300 | 1.36E-23    | 97.7036 | cd14978   | 7tmA_FMRFamide_R-like                 | -  | cl28897 | Class_A |
| GSLYST00002492001 | non-specific | 320109 | 43  | 332 | 1.35E-24    | 101.17  | cd14978   | 7tmA_FMRFamide_R-like                 | -  | cl28897 | Class_A |
| GSLYST00002589001 | specific     | 320109 | 70  | 367 | 3.03E-39    | 142.772 | cd14978   | 7tmA_FMRFamide_R-like                 | -  | cl28897 | Class_A |
| GSLYST00002589001 | non-specific | 222976 | 76  | 381 | 3.05E-10    | 60.9474 | PHAO3087  | PHAO3087                              | -  | cl27963 | Class_A |
| GSLYST00002608001 | non-specific | 313536 | 23  | 316 | 5.93E-06    | 46.8216 | pfam10324 | 7TM_GPCR_Srw                          | -  | cl21561 | Class_A |
| GSLYST00002608001 | non-specific | 320109 | 16  | 313 | 1.41E-26    | 105.793 | cd14978   | 7tmA_FMRFamide_R-like                 | -  | cl28897 | Class_A |
| GSLYST00002609001 | non-specific | 313536 | 23  | 316 | 1.01E-11    | 64.5408 | pfam10324 | 7TM_GPCR_Srw                          | -  | cl21561 | Class_A |
| GSLYST00002609001 | non-specific | 320109 | 16  | 313 | 9.80E-28    | 109.26  | cd14978   | 7tmA_FMRFamide_R-like                 | -  | cl28897 | Class_A |
| GSLYST00002613001 | non-specific | 320109 | 45  | 335 | 8.25E-22    | 93.8516 | cd14978   | 7tmA_FMRFamide_R-like                 | -  | cl28897 | Class_A |
| GSLYST00002638001 | non-specific | 320124 | 86  | 332 | 9.79E-75    | 232.875 | cd14993   | 7tmA_CCKR-like                        | -  | cl28897 | Class_A |
| GSLYST00002638001 | non-specific | 222976 | 87  | 338 | 1.45E-14    | 73.2738 | PHAO3087  | PHAO3087                              | N  | cl27963 | Class_A |
| GSLYST00002650001 | non-specific | 320326 | 75  | 376 | 2.48E-93    | 284.007 | cd15198   | 7tmA_GPR150                           | -  | cl28897 | Class_A |
| GSLYST00002650001 | non-specific | 222976 | 71  | 369 | 3.22E-12    | 67.1106 | PHAO3087  | PHAO3087                              | -  | cl27963 | Class_A |
| GSLYST00002670001 | non-specific | 320109 | 1   | 292 | 5.89E-27    | 106.948 | cd14978   | 7tmA_FMRFamide_R-like                 | -  | cl28897 | Class_A |
| GSLYST00002670001 | non-specific | 222976 | 5   | 199 | 0.00670894  | 37.4503 | PHAO3087  | PHAO3087                              | C  | cl27963 | Class_A |
| GSLYST00002794001 | non-specific | 313536 | 66  | 364 | 8.27E-16    | 77.2524 | pfam10324 | 7TM_GPCR_Srw                          | -  | cl21561 | Class_A |
| GSLYST00002794001 | specific     | 320109 | 59  | 360 | 1.19E-46    | 161.262 | cd14978   | 7tmA_FMRFamide_R-like                 | -  | cl28897 | Class_A |
| GSLYST00002815001 | non-specific | 320232 | 7   | 272 | 7.40E-24    | 97.0589 | cd15104   | 7tmA_GPR119_R_insulinotropic_receptor | -  | cl28897 | Class_A |
| GSLYST00002824001 | non-specific | 320109 | 20  | 316 | 5.59E-24    | 99.2444 | cd14978   | 7tmA_FMRFamide_R-like                 | -  | cl28897 | Class_A |
| GSLYST00002836001 | non-specific | 320336 | 59  | 359 | 1.13E-93    | 284.282 | cd15208   | 7tmA_OXR                              | -  | cl28897 | Class_A |
| GSLYST00002836001 | non-specific | 222976 | 62  | 361 | 2.22E-17    | 82.5186 | PHAO3087  | PHAO3087                              | -  | cl27963 | Class_A |
| GSLYST00002840001 | non-specific | 320109 | 5   | 289 | 4.34E-22    | 93.4664 | cd14978   | 7tmA_FMRFamide_R-like                 | -  | cl28897 | Class_A |
| GSLYST00002847001 | non-specific | 320335 | 1   | 233 | 1.15E-37    | 133.13  | cd15207   | 7tmA_NPFFR                            | N  | cl28897 | Class_A |
| GSLYST00002847001 | non-specific | 222976 | 7   | 243 | 0.000238497 | 41.3022 | PHAO3087  | PHAO3087                              | N  | cl27963 | Class_A |
| GSLYST00002848001 | non-specific | 320124 | 3   | 51  | 7.69E-10    | 51.446  | cd14993   | 7tmA_CCKR-like                        | C  | cl28897 | Class_A |
| GSLYST00002864001 | specific     | 320109 | 68  | 369 | 9.50E-48    | 164.728 | cd14978   | 7tmA_FMRFamide_R-like                 | -  | cl28897 | Class_A |
| GSLYST00002865001 | specific     | 320109 | 77  | 378 | 3.43E-52    | 176.67  | cd14978   | 7tmA_FMRFamide_R-like                 | -  | cl28897 | Class_A |
| GSLYST00002865001 | non-specific | 222976 | 89  | 283 | 6.89E-05    | 44.3838 | PHAO3087  | PHAO3087                              | C  | cl27963 | Class_A |
| GSLYST00002884001 | non-specific | 320109 | 15  | 303 | 1.08E-23    | 97.7036 | cd14978   | 7tmA_FMRFamide_R-like                 | -  | cl28897 | Class_A |
| GSLYST00002917001 | specific     | 320109 | 32  | 327 | 1.99E-44    | 156.254 | cd14978   | 7tmA_FMRFamide_R-like                 | -  | cl28897 | Class_A |
| GSLYST00003090001 | specific     | 320086 | 53  | 325 | 1.18E-35    | 132.014 | cd00637   | 7tm_classA_rhodopsin-like             | -  | cl28897 | Class_A |
| GSLYST00003162001 | specific     | 320459 | 47  | 337 | 8.80E-161   | 458.709 | cd15337   | 7tmA_Opsin_Gq_invertebrates           | -  | cl28897 | Class_A |
| GSLYST00003162001 | non-specific | 222976 | 2   | 288 | 6.06E-19    | 87.9114 | PHAO3087  | PHAO3087                              | C  | cl27963 | Class_A |
| GSLYST00003176001 | non-specific | 320109 | 35  | 250 | 8.85E-20    | 86.1476 | cd14978   | 7tmA_FMRFamide_R-like                 | N  | cl28897 | Class_A |
| GSLYST00003179001 | non-specific | 320513 | 33  | 300 | 2.54E-100   | 295.963 | cd15391   | 7tmA_NPR-like_invertebrate            | -  | cl28897 | Class_A |
| GSLYST00003179001 | non-specific | 222976 | 34  | 296 | 3.34E-19    | 85.9854 | PHAO3087  | PHAO3087                              | -  | cl27963 | Class_A |
| GSLYST00003184001 | non-specific | 313536 | 44  | 338 | 8.74E-11    | 61.8444 | pfam10324 | 7TM_GPCR_Srw                          | -  | cl21561 | Class_A |
| GSLYST00003184001 | non-specific | 320109 | 37  | 334 | 8.28E-29    | 112.341 | cd14978   | 7tmA_FMRFamide_R-like                 | -  | cl28897 | Class_A |
| GSLYST00003294001 | non-specific | 320109 | 13  | 288 | 5.14E-20    | 87.3032 | cd14978   | 7tmA_FMRFamide_R-like                 | -  | cl28897 | Class_A |
| GSLYST00003295001 | non-specific | 320109 | 1   | 282 | 2.65E-23    | 96.1628 | cd14978   | 7tmA_FMRFamide_R-like                 | -  | cl28897 | Class_A |
| GSLYST00003296001 | non-specific | 320109 | 1   | 288 | 3.54E-27    | 106.948 | cd14978   | 7tmA_FMRFamide_R-like                 | -  | cl28897 | Class_A |
| GSLYST00003312001 | non-specific | 320109 | 1   | 270 | 1.40E-19    | 86.1476 | cd14978   | 7tmA_FMRFamide_R-like                 | -  | cl28897 | Class_A |
| GSLYST00003313001 | non-specific | 320109 | 1   | 277 | 1.87E-18    | 83.066  | cd14978   | 7tmA_FMRFamide_R-like                 | -  | cl28897 | Class_A |
| GSLYST00003314001 | non-specific | 320109 | 1   | 269 | 2.47E-20    | 88.0736 | cd14978   | 7tmA_FMRFamide_R-like                 | -  | cl28897 | Class_A |
| GSLYST00003315001 | non-specific | 320109 | 14  | 277 | 1.31E-17    | 80.7548 | cd14978   | 7tmA_FMRFamide_R-like                 | -  | cl28897 | Class_A |
| GSLYST00003317001 | non-specific | 320109 | 2   | 283 | 1.41E-27    | 108.104 | cd14978   | 7tmA_FMRFamide_R-like                 | -  | cl28897 | Class_A |
| GSLYST00003317001 | non-specific | 222976 | 3   | 222 | 2.28E-07    | 50.9322 | PHAO3087  | PHAO3087                              | C  | cl27963 | Class_A |
| GSLYST00003385001 | non-specific | 320224 | 31  | 320 | 6.79E-108   | 315.774 | cd15096   | 7tmA_AstA_R_insect                    | -  | cl28897 | Class_A |
| GSLYST00003385001 | non-specific | 222976 | 27  | 330 | 1.39E-28    | 112.564 | PHAO3087  | PHAO3087                              | -  | cl27963 | Class_A |
| GSLYST00003386001 | non-specific | 320224 | 24  | 311 | 3.89E-106   | 311.152 | cd15096   | 7tmA_AstA_R_insect                    | -  | cl28897 | Class_A |
| GSLYST00003386001 | non-specific | 222976 | 20  | 315 | 3.16E-21    | 92.1486 | PHAO3087  | PHAO3087                              | -  | cl27963 | Class_A |
| GSLYST00003387001 | non-specific | 320224 | 24  | 311 | 2.23E-103   | 304.604 | cd15096   | 7tmA_AstA_R_insect                    | -  | cl28897 | Class_A |
| GSLYST00003387001 | non-specific | 222976 | 20  | 315 | 1.27E-20    | 90.6078 | PHAO3087  | PHAO3087                              | -  | cl27963 | Class_A |
| GSLYST00003388001 | specific     | 320224 | 47  | 333 | 1.81E-144   | 410.919 | cd15096   | 7tmA_AstA_R_insect                    | -  | cl28897 | Class_A |
| GSLYST00003388001 | non-specific | 222976 | 45  | 337 | 1.66E-23    | 99.4674 | PHAO3087  | PHAO3087                              | -  | cl27963 | Class_A |
| GSLYST00003391001 | non-specific | 320335 | 3   | 67  | 1.08E-13    | 63.7945 | cd15207   | 7tmA_NPFFR                            | C  | cl28897 | Class_A |
| GSLYST00003392001 | specific     | 320124 | 1   | 216 | 2.45E-80    | 244.816 | cd14993   | 7tmA_CCKR-like                        | N  | cl28897 | Class_A |
| GSLYST00003392001 | non-specific | 222976 | 1   | 220 | 9.21E-16    | 75.9702 | PHAO3087  | PHAO3087                              | N  | cl27963 | Class_A |
| GSLYST00003651001 | non-specific | 320109 | 1   | 309 | 1.07E-16    | 78.4436 | cd14978   | 7tmA_FMRFamide_R-like                 | -  | cl28897 | Class_A |
| GSLYST00003651001 | non-specific | 313540 | 1   | 132 | 0.00872728  | 36.7833 | pfam10328 | 7TM_GPCR_Srx                          | C  | cl21561 | Class_A |
| GSLYST00003704001 | non-specific | 320262 | 79  | 387 | 1.74E-128   | 375.515 | cd15134   | 7tmA_capaR                            | -  | cl28897 | Class_A |
| GSLYST00003704001 | non-specific | 222976 | 76  | 391 | 2.26E-14    | 74.0442 | PHAO3087  | PHAO3087                              | -  | cl27963 | Class_A |
| GSLYST00003771001 | non-specific | 320109 | 1   | 309 | 1.08E-17    | 81.5252 | cd14978   | 7tmA_FMRFamide_R-like                 | -  | cl28897 | Class_A |
| GSLYST00003798001 | non-specific | 320515 | 1   | 68  | 3.09E-44    | 146.014 | cd15393   | 7tmA_Leucokinin-like                  | N  | cl28897 | Class_A |
| GSLYST00003798001 | non-specific | 222976 | 1   | 64  | 5.12E-05    | 41.3022 | PHAO3087  | PHAO3087                              | N  | cl27963 | Class_A |
| GSLYST00003803001 | superfamily  | 333717 | 16  | 159 | 1.37E-18    | 80.7824 | cl28897   | 7tm_GPCRs superfamily                 | C  | -       | Class_A |
| GSLYST00003899001 | specific     | 320512 | 51  | 336 | 3.17E-142   | 406.68  | cd15390   | 7tmA_TACR                             | -  | cl28897 | Class_A |
| GSLYST00003899001 | non-specific | 222976 | 23  | 332 | 1.11E-18    | 86.3706 | PHAO3087  | PHAO3087                              | -  | cl27963 | Class_A |
| GSLYST00003984001 | non-specific | 320109 | 42  | 259 | 6.39E-30    | 113.497 | cd14978   | 7tmA_FMRFamide_R-like                 | N  | cl28897 | Class_A |
| GSLYST00003985001 | non-specific | 320109 | 20  | 318 | 3.69E-18    | 83.066  | cd14978   | 7tmA_FMRFamide_R-like                 | -  | cl28897 | Class_A |
| GSLYST00003986001 | non-specific | 320109 | 15  | 312 | 5.21E-18    | 82.6808 | cd14978   | 7tmA_FMRFamide_R-like                 | -  | cl28897 | Class_A |
| GSLYST00003987001 | non-specific | 320109 | 1   | 287 | 9.23E-21    | 89.6144 | cd14978   | 7tmA_FMRFamide_R-like                 | -  | cl28897 | Class_A |
| GSLYST00003988001 | non-specific | 320109 |     |     |             |         |           |                                       |    |         |         |

|                   |              |        |     |     |             |         |            |                           |    |         |         |
|-------------------|--------------|--------|-----|-----|-------------|---------|------------|---------------------------|----|---------|---------|
| GSLYST00004246001 | non-specific | 222976 | 35  | 114 | 0.00147212  | 37.8355 | PHA03087   | PHA03087                  | N  | cl27963 | Class_A |
| GSLYST00004278001 | non-specific | 320132 | 1   | 69  | 2.92E-30    | 108.902 | cd15001    | 7tmA_GPRnna14-like        | N  | cl28897 | Class_A |
| GSLYST00004278001 | non-specific | 165177 | 1   | 74  | 1.14E-05    | 42.9693 | PHA02834   | PHA02834                  | N  | cl27963 | Class_A |
| GSLYST00004295001 | specific     | 320265 | 645 | 928 | 2.05E-152   | 450.884 | cd15137    | 7tmA_Relaxin_R            | -  | cl28897 | Class_A |
| GSLYST00004295001 | specific     | 278486 | 238 | 274 | 8.49E-10    | 54.562  | pfam00057  | Ldl_recept_a              | -  | cl00104 | Class_A |
| GSLYST00004295001 | non-specific | 278486 | 279 | 313 | 1.01E-06    | 45.7024 | pfam00057  | Ldl_recept_a              | -  | cl00104 | Class_A |
| GSLYST00004295001 | non-specific | 278486 | 5   | 39  | 1.01E-06    | 45.7024 | pfam00057  | Ldl_recept_a              | -  | cl00104 | Class_A |
| GSLYST00004295001 | specific     | 238060 | 5   | 39  | 1.90E-10    | 56.4462 | cd00112    | LDLa                      | -  | cl00104 | Class_A |
| GSLYST00004295001 | specific     | 238060 | 279 | 313 | 1.02E-09    | 54.135  | cd00112    | LDLa                      | -  | cl00104 | Class_A |
| GSLYST00004295001 | specific     | 238060 | 240 | 274 | 1.09E-09    | 54.135  | cd00112    | LDLa                      | -  | cl00104 | Class_A |
| GSLYST00004295001 | specific     | 197566 | 5   | 36  | 5.57E-09    | 52.2505 | smart00192 | LDLa                      | -  | cl00104 | Class_A |
| GSLYST00004295001 | specific     | 197566 | 279 | 310 | 8.91E-09    | 51.4801 | smart00192 | LDLa                      | -  | cl00104 | Class_A |
| GSLYST00004295001 | specific     | 197566 | 240 | 271 | 1.21E-08    | 51.0949 | smart00192 | LDLa                      | -  | cl00104 | Class_A |
| GSLYST00004295001 | specific     | 197566 | 44  | 75  | 3.30E-06    | 44.1613 | smart00192 | LDLa                      | -  | cl00104 | Class_A |
| GSLYST00004295001 | specific     | 238060 | 44  | 80  | 3.89E-06    | 44.1198 | cd00112    | LDLa                      | -  | cl00104 | Class_A |
| GSLYST00004295001 | specific     | 238060 | 362 | 397 | 0.000110687 | 39.8826 | cd00112    | LDLa                      | -  | cl00104 | Class_A |
| GSLYST00004295001 | specific     | 238060 | 203 | 231 | 0.000265426 | 38.727  | cd00112    | LDLa                      | -  | cl00104 | Class_A |
| GSLYST00004295001 | superfamily  | 294076 | 5   | 39  | 1.90E-10    | 56.4462 | cl00104    | LDLa superfamily          | -  | -       | Class_A |
| GSLYST00004295001 | superfamily  | 294076 | 238 | 274 | 8.49E-10    | 54.562  | cl00104    | LDLa superfamily          | -  | -       | Class_A |
| GSLYST00004295001 | superfamily  | 294076 | 279 | 313 | 1.02E-09    | 54.135  | cl00104    | LDLa superfamily          | -  | -       | Class_A |
| GSLYST00004295001 | superfamily  | 294076 | 44  | 75  | 3.30E-06    | 44.1613 | cl00104    | LDLa superfamily          | -  | -       | Class_A |
| GSLYST00004295001 | superfamily  | 294076 | 362 | 397 | 0.000110687 | 39.8826 | cl00104    | LDLa superfamily          | -  | -       | Class_A |
| GSLYST00004295001 | superfamily  | 294076 | 203 | 231 | 0.000265426 | 38.727  | cl00104    | LDLa superfamily          | -  | -       | Class_A |
| GSLYST00004295001 | specific     | 316378 | 510 | 569 | 1.17E-15    | 71.7894 | pfam13855  | LRR_8                     | -  | cl25992 | Class_A |
| GSLYST00004295001 | specific     | 197566 | 362 | 387 | 0.00095324  | 37.2277 | smart00192 | LDLa                      | C  | cl00104 | Class_A |
| GSLYST00004295001 | non-specific | 278486 | 204 | 231 | 0.00579658  | 35.302  | pfam00057  | Ldl_recept_a              | N  | cl00104 | Class_A |
| GSLYST00004295001 | specific     | 197566 | 204 | 228 | 0.00446811  | 35.3017 | smart00192 | LDLa                      | N  | cl00104 | Class_A |
| GSLYST00004295001 | non-specific | 238064 | 466 | 600 | 0.000297021 | 43.8834 | cd00116    | LRR_Rl                    | N  | cl26161 | Class_A |
| GSLYST00004295001 | superfamily  | 330982 | 466 | 600 | 0.000297021 | 43.8834 | cl26161    | LRR_Rl superfamily        | N  | -       | Class_A |
| GSLYST00004295001 | non-specific | 165021 | 645 | 919 | 4.83E-05    | 46.545  | PHA02638   | PHA02638                  | N  | cl27963 | Class_A |
| GSLYST00004295001 | specific     | 272723 | 460 | 593 | 6.47E-19    | 90.0273 | COG4886    | LRR                       | NC | cl25992 | Class_A |
| GSLYST00004295001 | superfamily  | 330813 | 460 | 593 | 6.47E-19    | 90.0273 | cl25992    | LRR_8 superfamily         | NC | -       | Class_A |
| GSLYST00004295001 | non-specific | 215061 | 455 | 641 | 8.54E-08    | 56.0096 | PLN00113   | PLN00113                  | NC | cl26793 | Class_A |
| GSLYST00004295001 | superfamily  | 331614 | 455 | 641 | 8.54E-08    | 56.0096 | cl26793    | PLN00113 superfamily      | NC | -       | Class_A |
| GSLYST00004392001 | non-specific | 320109 | 1   | 152 | 1.71E-11    | 61.88   | cd14978    | 7tmA_FMRFamide_R-like     | N  | cl28897 | Class_A |
| GSLYST00004444001 | non-specific | 320109 | 9   | 239 | 7.66E-07    | 48.7832 | cd14978    | 7tmA_FMRFamide_R-like     | N  | cl28897 | Class_A |
| GSLYST00004445001 | non-specific | 320109 | 25  | 331 | 2.48E-11    | 63.4208 | cd14978    | 7tmA_FMRFamide_R-like     | -  | cl28897 | Class_A |
| GSLYST00004445001 | non-specific | 313540 | 32  | 167 | 0.000458678 | 41.0205 | pfam10328  | 7TM_GPCR_Srx              | C  | cl21561 | Class_A |
| GSLYST00004448001 | non-specific | 320109 | 43  | 394 | 4.33E-07    | 51.0944 | cd14978    | 7tmA_FMRFamide_R-like     | -  | cl28897 | Class_A |
| GSLYST00004448001 | non-specific | 313540 | 107 | 232 | 0.000158289 | 42.9465 | pfam10328  | 7TM_GPCR_Srx              | C  | cl21561 | Class_A |
| GSLYST00004449001 | non-specific | 320109 | 2   | 296 | 4.54E-22    | 93.4664 | cd14978    | 7tmA_FMRFamide_R-like     | -  | cl28897 | Class_A |
| GSLYST00004477001 | non-specific | 320132 | 3   | 278 | 3.75E-59    | 189.409 | cd15001    | 7tmA_GPRnna14-like        | -  | cl28897 | Class_A |
| GSLYST00004477001 | non-specific | 222976 | 17  | 148 | 2.64E-08    | 54.0138 | PHA03087   | PHA03087                  | NC | cl27963 | Class_A |
| GSLYST00004508001 | non-specific | 313536 | 22  | 295 | 9.10E-05    | 42.9696 | pfam10324  | 7TM_GPCR_Srw              | -  | cl21561 | Class_A |
| GSLYST00004508001 | non-specific | 320109 | 1   | 291 | 4.02E-18    | 82.2956 | cd14978    | 7tmA_FMRFamide_R-like     | -  | cl28897 | Class_A |
| GSLYST00004509001 | non-specific | 313536 | 1   | 285 | 1.30E-09    | 57.6072 | pfam10324  | 7TM_GPCR_Srw              | -  | cl21561 | Class_A |
| GSLYST00004509001 | non-specific | 320109 | 1   | 285 | 8.05E-27    | 105.793 | cd14978    | 7tmA_FMRFamide_R-like     | -  | cl28897 | Class_A |
| GSLYST00004510001 | non-specific | 320109 | 16  | 312 | 1.32E-15    | 75.362  | cd14978    | 7tmA_FMRFamide_R-like     | -  | cl28897 | Class_A |
| GSLYST00004511001 | non-specific | 320109 | 23  | 319 | 9.05E-19    | 84.6068 | cd14978    | 7tmA_FMRFamide_R-like     | -  | cl28897 | Class_A |
| GSLYST00004512001 | non-specific | 320109 | 2   | 282 | 1.36E-20    | 88.844  | cd14978    | 7tmA_FMRFamide_R-like     | -  | cl28897 | Class_A |
| GSLYST00004513001 | non-specific | 320109 | 1   | 262 | 5.33E-16    | 76.1324 | cd14978    | 7tmA_FMRFamide_R-like     | -  | cl28897 | Class_A |
| GSLYST00004513001 | non-specific | 313536 | 109 | 269 | 0.000450895 | 40.6584 | pfam10324  | 7TM_GPCR_Srw              | N  | cl21561 | Class_A |
| GSLYST00004514001 | non-specific | 320109 | 18  | 308 | 4.11E-20    | 88.0736 | cd14978    | 7tmA_FMRFamide_R-like     | -  | cl28897 | Class_A |
| GSLYST00004544001 | non-specific | 320109 | 2   | 187 | 1.19E-07    | 50.7092 | cd14978    | 7tmA_FMRFamide_R-like     | C  | cl28897 | Class_A |
| GSLYST00004545001 | non-specific | 313536 | 13  | 305 | 8.33E-07    | 49.518  | pfam10324  | 7TM_GPCR_Srw              | -  | cl21561 | Class_A |
| GSLYST00004545001 | non-specific | 320109 | 8   | 302 | 3.66E-25    | 101.941 | cd14978    | 7tmA_FMRFamide_R-like     | -  | cl28897 | Class_A |
| GSLYST00004546001 | non-specific | 313536 | 13  | 306 | 0.000139017 | 42.5844 | pfam10324  | 7TM_GPCR_Srw              | -  | cl21561 | Class_A |
| GSLYST00004546001 | non-specific | 320109 | 8   | 302 | 6.88E-24    | 98.474  | cd14978    | 7tmA_FMRFamide_R-like     | -  | cl28897 | Class_A |
| GSLYST00004547001 | non-specific | 313536 | 47  | 342 | 4.24E-08    | 53.7552 | pfam10324  | 7TM_GPCR_Srw              | -  | cl21561 | Class_A |
| GSLYST00004547001 | non-specific | 320109 | 41  | 337 | 1.11E-25    | 104.252 | cd14978    | 7tmA_FMRFamide_R-like     | -  | cl28897 | Class_A |
| GSLYST00004548001 | non-specific | 320109 | 25  | 317 | 2.96E-17    | 80.3696 | cd14978    | 7tmA_FMRFamide_R-like     | -  | cl28897 | Class_A |
| GSLYST00004549001 | non-specific | 313536 | 22  | 315 | 5.81E-05    | 43.74   | pfam10324  | 7TM_GPCR_Srw              | -  | cl21561 | Class_A |
| GSLYST00004549001 | non-specific | 320109 | 17  | 310 | 1.30E-25    | 103.482 | cd14978    | 7tmA_FMRFamide_R-like     | -  | cl28897 | Class_A |
| GSLYST00004562001 | specific     | 320109 | 60  | 349 | 7.00E-44    | 153.172 | cd14978    | 7tmA_FMRFamide_R-like     | -  | cl28897 | Class_A |
| GSLYST00004562001 | non-specific | 222976 | 52  | 307 | 0.00556546  | 38.2207 | PHA03087   | PHA03087                  | -  | cl27963 | Class_A |
| GSLYST00004573001 | non-specific | 317417 | 89  | 279 | 4.95E-31    | 115.831 | pfam14997  | CECR6_TMEM121             | -  | cl20875 | Class_A |
| GSLYST00004573001 | superfamily  | 317417 | 89  | 279 | 4.95E-31    | 115.831 | cl20875    | CECR6_TMEM121 superfamily | -  | -       | Class_A |
| GSLYST00004573001 | superfamily  | 333717 | 14  | 98  | 0.000627281 | 40.4802 | cl28897    | 7tm_GPCRs superfamily     | N  | -       | Class_A |
| GSLYST00004573001 | non-specific | 320170 | 14  | 98  | 0.000627281 | 40.4802 | cd15042    | 7tmC_Boss                 | N  | cl28897 | Class_A |
| GSLYST00004584001 | specific     | 320112 | 1   | 210 | 9.67E-67    | 220.965 | cd14981    | 7tmA_Prostanoid_R         | N  | cl28897 | Class_A |
| GSLYST00004591001 | non-specific | 320140 | 51  | 250 | 3.61E-49    | 171.088 | cd15012    | 7tmA_Trissin_R            | C  | cl28897 | Class_A |
| GSLYST00004591001 | non-specific | 222976 | 40  | 251 | 2.31E-13    | 70.9626 | PHA03087   | PHA03087                  | C  | cl27963 | Class_A |
| GSLYST00004610001 | non-specific | 313536 | 10  | 316 | 1.23E-17    | 81.8748 | pfam10324  | 7TM_GPCR_Srw              | -  | cl21561 | Class_A |
| GSLYST00004610001 | specific     | 320109 | 6   | 319 | 5.22E-55    | 180.907 | cd14978    | 7tmA_FMRFamide_R-like     | -  | cl28897 | Class_A |
| GSLYST00004633001 | specific     | 320086 | 34  | 276 | 2.58E-26    | 103.894 | cd00637    | 7tm_classA_rhodopsin-like | -  | cl28897 | Class_A |
| GSLYST00004643001 | specific     | 320109 | 67  | 350 | 1.01E-36    | 134.683 | cd14978    | 7tmA_FMRFamide_R-like     | -  | cl28897 | Class_A |
| GSLYST00004805001 | non-specific | 320109 | 15  | 310 | 1.47E-23    | 97.7036 | cd14978    | 7tmA_FMRFamide_R-like     | -  | cl28897 | Class_A |
| GSLYST00004810001 | non-specific | 320109 | 37  | 332 | 4.65E-24    | 99.6296 | cd14978    | 7tmA_FMRFamide_R-like     | -  | cl28897 | Class_A |
| GSLYST00004811001 | non-specific | 320109 | 22  | 319 | 4.06E-23    | 96.9332 | cd14978    | 7tmA_FMRFamide_R-like     | -  | cl28897 | Class_A |
| GSLYST00004911001 | non-specific | 320109 | 78  | 360 | 1.53E-23    | 99.2444 | cd14978    | 7tmA_FMRFamide_R-like     | -  | cl28897 | Class_A |
| GSLYST00004914001 | non-specific | 320100 | 25  | 322 | 7.14E-43    | 149.279 | cd14969    | 7tmA_Opsins_type2_animals | -  | cl28897 | Class_A |
| GSLYST00004930001 | non-specific | 320109 | 24  | 327 | 6.79E-16    | 76.5176 | cd14978    | 7tmA_FMRFamide_R-like     | -  | cl28897 | Class_A |
| GSLYST00005028001 | non-specific | 320334 | 71  | 149 | 2.05E-37    | 128.277 | cd15206    | 7tmA_CCK_R                | C  | cl28897 | Class_A |
| GSLYST00005028001 | non-specific | 165021 | 46  | 141 | 1.90E-10    | 57.3306 | PHA02638   | PHA02638                  | C  | cl27963 | Class_A |
| GSLYST00005029001 | non-specific | 320334 | 2   | 220 | 6.46E-33    | 120.958 | cd15206    | 7tmA_CCK_R                | N  | cl28897 | Class_A |
| GSLYST00005029001 | non-specific | 222976 | 146 | 216 | 0.0012548   | 39.3763 | PHA03087   | PHA03087                  | N  | cl27963 | Class_A |
| GSLYST00005067001 | specific     | 320086 | 57  | 328 | 1.68E-65    | 217.913 | cd00637    | 7tm_classA_rhodopsin-like | -  | cl28897 | Class_A |
| GSLYST00005067001 | non-specific | 222976 | 47  | 331 | 9.04E-17    | 82.1334 | PHA03087   | PHA03087                  | -  | cl27963 | Class_A |
| GSLYST00005070001 | specific     | 320086 | 45  | 317 | 2.88E-72    | 237.173 | cd00637    | 7tm_classA_rhodopsin-like | -  | cl28897 | Class_A |
| GSLYST00005070001 | non-specific | 222976 | 42  | 328 | 8.06E-21    | 94.4598 | PHA03087   | PHA03087                  | -  | cl27963 | Class_A |
| GSLYST00005070001 | non-specific | 316466 | 519 | 631 | 0.00191407  | 39.8665 | pfam13945  | NST1                      | C  | cl16492 | Class_A |
| GSLYST00005070001 | superfamily  | 316466 | 519 | 631 | 0.00191407  | 39.8665 | cl16492    | NST1 superfamily          | C  | -       | Class_A |
| GSLYST00005070001 | non-specific | 224261 | 376 | 430 | 0.00406274  | 37.3376 | COG1342    | COG1342                   | N  | cl22854 | Class_A |
| GSLYST00005070001 | superfamily  | 328931 | 376 | 430 | 0.00406274  | 37.3376 | cl22854    | HTH_XRE superfamily       | N  | -       | Class_A |
| GSLYST00005102001 | non-specific | 313540 | 14  | 138 | 3.92E-06    | 46.0281 | pfam10328  | 7TM_GPCR_Srx              | C  | cl21561 | Class_A |
| GSLYST00005102001 | non-specific | 320109 | 10  | 167 | 4.36E-07    | 48.7832 | cd14978    | 7tmA_FMRFamide_R-like     | C  | cl28897 | Class_A |
| GSLYST00005103001 | non-specific | 313540 | 14  | 138 | 8.51E-07    | 48.3393 | pfam10328  | 7TM_GPCR_Srx              | C  | cl21561 | Class_A |
| GSLYST00005103001 | non-specific | 320109 | 10  |     |             |         |            |                           |    |         |         |

|                   |              |        |     |     |             |         |           |                           |    |         |         |
|-------------------|--------------|--------|-----|-----|-------------|---------|-----------|---------------------------|----|---------|---------|
| GSLYST00005481001 | superfamily  | 330813 | 11  | 63  | 2.45E-06    | 44.4403 | cl25992   | LRR_8 superfamily         | -  | -       | Class_A |
| GSLYST00005481001 | non-specific | 222976 | 122 | 342 | 0.000568717 | 41.3022 | PHA03087  | PHA03087                  | C  | cl27963 | Class_A |
| GSLYST00005491001 | non-specific | 32034  | 1   | 191 | 1.16E-90    | 270.416 | cd15206   | 7tmA_CCK_R                | C  | cl28897 | Class_A |
| GSLYST00005491001 | non-specific | 222976 | 1   | 198 | 3.55E-20    | 88.6818 | PHA03087  | PHA03087                  | C  | cl27963 | Class_A |
| GSLYST00005513001 | non-specific | 320109 | 26  | 300 | 2.11E-17    | 80.3696 | cd14978   | 7tmA_FMRFamide_R-like     | -  | cl28897 | Class_A |
| GSLYST00005514001 | non-specific | 320109 | 2   | 281 | 6.60E-13    | 67.2728 | cd14978   | 7tmA_FMRFamide_R-like     | -  | cl28897 | Class_A |
| GSLYST00005515001 | non-specific | 313536 | 21  | 312 | 0.000293635 | 41.814  | pfam10324 | 7TM_GPCR_Srw              | -  | cl21561 | Class_A |
| GSLYST00005515001 | non-specific | 320109 | 13  | 303 | 2.29E-19    | 86.1476 | cd14978   | 7tmA_FMRFamide_R-like     | -  | cl28897 | Class_A |
| GSLYST00005515001 | non-specific | 165021 | 15  | 256 | 0.000184638 | 42.693  | PHA02638  | PHA02638                  | NC | cl27963 | Class_A |
| GSLYST00005516001 | non-specific | 320109 | 1   | 203 | 2.50E-10    | 58.4132 | cd14978   | 7tmA_FMRFamide_R-like     | N  | cl28897 | Class_A |
| GSLYST00005560001 | non-specific | 320128 | 2   | 97  | 1.10E-32    | 115.465 | cd14997   | 7tmA_ETH-R                | N  | cl28897 | Class_A |
| GSLYST00005561001 | non-specific | 320128 | 42  | 232 | 2.86E-43    | 147.437 | cd14997   | 7tmA_ETH-R                | C  | cl28897 | Class_A |
| GSLYST00005561001 | non-specific | 222976 | 49  | 182 | 2.75E-06    | 47.0802 | PHA03087  | PHA03087                  | C  | cl27963 | Class_A |
| GSLYST00005562001 | non-specific | 320128 | 18  | 108 | 8.10E-31    | 111.228 | cd14997   | 7tmA_ETH-R                | N  | cl28897 | Class_A |
| GSLYST00005563001 | non-specific | 320262 | 14  | 69  | 1.66E-10    | 54.2588 | cd15134   | 7tmA_capaR                | NC | cl28897 | Class_A |
| GSLYST00005564001 | non-specific | 320128 | 39  | 93  | 4.39E-05    | 39.9659 | cd14997   | 7tmA_ETH-R                | C  | cl28897 | Class_A |
| GSLYST00005588001 | non-specific | 320109 | 5   | 329 | 1.04E-11    | 64.5764 | cd14978   | 7tmA_FMRFamide_R-like     | -  | cl28897 | Class_A |
| GSLYST00005643001 | non-specific | 320109 | 1   | 291 | 8.27E-17    | 78.8288 | cd14978   | 7tmA_FMRFamide_R-like     | -  | cl28897 | Class_A |
| GSLYST00005643001 | non-specific | 165021 | 1   | 243 | 0.00825504  | 37.3002 | PHA02638  | PHA02638                  | N  | cl27963 | Class_A |
| GSLYST00005694001 | non-specific | 320324 | 597 | 670 | 2.72E-40    | 148.537 | cd15196   | 7tmA_Vasopressin_Oxytocin | N  | cl28897 | Class_A |
| GSLYST00005694001 | non-specific | 222976 | 595 | 665 | 0.00120022  | 41.6874 | PHA03087  | PHA03087                  | N  | cl27963 | Class_A |
| GSLYST00005694001 | non-specific | 320324 | 1   | 114 | 1.15E-52    | 182.82  | cd15196   | 7tmA_Vasopressin_Oxytocin | NC | cl28897 | Class_A |
| GSLYST00005779001 | non-specific | 320109 | 20  | 312 | 3.47E-08    | 53.7908 | cd14978   | 7tmA_FMRFamide_R-like     | -  | cl28897 | Class_A |
| GSLYST00005780001 | non-specific | 320109 | 19  | 343 | 4.82E-13    | 68.4284 | cd14978   | 7tmA_FMRFamide_R-like     | -  | cl28897 | Class_A |
| GSLYST00005781001 | non-specific | 320109 | 7   | 223 | 0.000521151 | 39.9237 | cd14978   | 7tmA_FMRFamide_R-like     | -  | cl28897 | Class_A |
| GSLYST00005782001 | non-specific | 320109 | 12  | 349 | 7.87E-14    | 70.7396 | cd14978   | 7tmA_FMRFamide_R-like     | -  | cl28897 | Class_A |
| GSLYST00005783001 | non-specific | 320109 | 22  | 284 | 2.71E-06    | 47.6276 | cd14978   | 7tmA_FMRFamide_R-like     | -  | cl28897 | Class_A |
| GSLYST00005784001 | non-specific | 320109 | 6   | 319 | 0.000117998 | 43.0052 | cd14978   | 7tmA_FMRFamide_R-like     | -  | cl28897 | Class_A |
| GSLYST00005785001 | non-specific | 320109 | 6   | 319 | 0.000198715 | 42.2348 | cd14978   | 7tmA_FMRFamide_R-like     | -  | cl28897 | Class_A |
| GSLYST00005786001 | non-specific | 320109 | 6   | 322 | 2.31E-05    | 45.3164 | cd14978   | 7tmA_FMRFamide_R-like     | -  | cl28897 | Class_A |
| GSLYST00005795001 | non-specific | 320109 | 1   | 305 | 3.14E-12    | 65.732  | cd14978   | 7tmA_FMRFamide_R-like     | -  | cl28897 | Class_A |
| GSLYST00005819001 | specific     | 320098 | 83  | 282 | 9.04E-71    | 227.831 | cd14967   | 7tmA_amine_R-like         | C  | cl28897 | Class_A |
| GSLYST00005819001 | non-specific | 320098 | 488 | 559 | 5.61E-24    | 101.1   | cd14967   | 7tmA_amine_R-like         | N  | cl28897 | Class_A |
| GSLYST00005819001 | non-specific | 165021 | 75  | 290 | 1.24E-14    | 75.8202 | PHA02638  | PHA02638                  | NC | cl27963 | Class_A |
| GSLYST00005850001 | specific     | 320086 | 25  | 295 | 8.88E-11    | 61.5224 | cd00637   | 7tm_classA_rhodopsin-like | -  | cl28897 | Class_A |
| GSLYST00005994001 | non-specific | 320109 | 56  | 345 | 1.94E-27    | 109.26  | cd14978   | 7tmA_FMRFamide_R-like     | -  | cl28897 | Class_A |
| GSLYST00005994001 | non-specific | 222976 | 66  | 345 | 0.00267953  | 38.9911 | PHA03087  | PHA03087                  | -  | cl27963 | Class_A |
| GSLYST00006018001 | non-specific | 320109 | 60  | 343 | 1.17E-18    | 84.992  | cd14978   | 7tmA_FMRFamide_R-like     | -  | cl28897 | Class_A |
| GSLYST00006018001 | non-specific | 313536 | 131 | 350 | 0.00370475  | 38.7324 | pfam10324 | 7TM_GPCR_Srw              | N  | cl21561 | Class_A |
| GSLYST00006019001 | non-specific | 320109 | 5   | 301 | 1.25E-17    | 81.14   | cd14978   | 7tmA_FMRFamide_R-like     | -  | cl28897 | Class_A |
| GSLYST00006019001 | non-specific | 313536 | 89  | 308 | 0.00584775  | 37.5768 | pfam10324 | 7TM_GPCR_Srw              | N  | cl21561 | Class_A |
| GSLYST00006020001 | non-specific | 320109 | 20  | 312 | 5.90E-15    | 73.8212 | cd14978   | 7tmA_FMRFamide_R-like     | -  | cl28897 | Class_A |
| GSLYST00006041001 | specific     | 320086 | 1   | 174 | 7.61E-31    | 112.369 | cd00637   | 7tm_classA_rhodopsin-like | C  | cl28897 | Class_A |
| GSLYST00006041001 | non-specific | 222976 | 2   | 167 | 0.000972408 | 38.2207 | PHA03087  | PHA03087                  | C  | cl27963 | Class_A |
| GSLYST00006200001 | non-specific | 320109 | 1   | 317 | 3.04E-13    | 68.8136 | cd14978   | 7tmA_FMRFamide_R-like     | -  | cl28897 | Class_A |
| GSLYST00006201001 | non-specific | 320109 | 3   | 232 | 2.16E-05    | 44.1608 | cd14978   | 7tmA_FMRFamide_R-like     | -  | cl28897 | Class_A |
| GSLYST00006354001 | specific     | 320331 | 45  | 341 | 6.12E-118   | 344.588 | cd15203   | 7tmA_NPYR-like            | -  | cl28897 | Class_A |
| GSLYST00006354001 | non-specific | 222976 | 29  | 337 | 3.88E-22    | 96.0006 | PHA03087  | PHA03087                  | -  | cl27963 | Class_A |
| GSLYST00006494001 | non-specific | 320109 | 57  | 350 | 6.64E-15    | 74.5916 | cd14978   | 7tmA_FMRFamide_R-like     | -  | cl28897 | Class_A |
| GSLYST00006494001 | non-specific | 222976 | 1   | 162 | 0.000223032 | 42.843  | PHA03087  | PHA03087                  | C  | cl27963 | Class_A |
| GSLYST00006510001 | non-specific | 320137 | 20  | 302 | 1.85E-51    | 172.711 | cd15008   | 7tmA_GPR19                | -  | cl28897 | Class_A |
| GSLYST00006510001 | non-specific | 222976 | 51  | 271 | 5.06E-07    | 50.9322 | PHA03087  | PHA03087                  | N  | cl27963 | Class_A |
| GSLYST00006580001 | non-specific | 320128 | 3   | 164 | 2.28E-30    | 111.228 | cd14997   | 7tmA_ETH-R                | N  | cl28897 | Class_A |
| GSLYST00006581001 | non-specific | 320128 | 6   | 57  | 3.16E-12    | 61.5371 | cd14997   | 7tmA_ETH-R                | N  | cl28897 | Class_A |
| GSLYST00006584001 | non-specific | 313536 | 50  | 283 | 0.00132509  | 39.5028 | pfam10324 | 7TM_GPCR_Srw              | N  | cl21561 | Class_A |
| GSLYST00006584001 | non-specific | 320109 | 61  | 283 | 4.25E-11    | 61.88   | cd14978   | 7tmA_FMRFamide_R-like     | N  | cl28897 | Class_A |
| GSLYST00006585001 | non-specific | 320109 | 30  | 322 | 7.39E-24    | 99.2444 | cd14978   | 7tmA_FMRFamide_R-like     | -  | cl28897 | Class_A |
| GSLYST00006707001 | non-specific | 320109 | 52  | 333 | 1.22E-24    | 102.326 | cd14978   | 7tmA_FMRFamide_R-like     | -  | cl28897 | Class_A |
| GSLYST00006789001 | non-specific | 320109 | 16  | 312 | 6.37E-27    | 107.334 | cd14978   | 7tmA_FMRFamide_R-like     | -  | cl28897 | Class_A |
| GSLYST00006861001 | specific     | 320109 | 51  | 389 | 5.79E-61    | 199.011 | cd14978   | 7tmA_FMRFamide_R-like     | -  | cl28897 | Class_A |
| GSLYST00006863001 | specific     | 320109 | 1   | 299 | 1.31E-32    | 121.971 | cd14978   | 7tmA_FMRFamide_R-like     | -  | cl28897 | Class_A |
| GSLYST00006886001 | non-specific | 320109 | 3   | 299 | 6.23E-26    | 103.867 | cd14978   | 7tmA_FMRFamide_R-like     | -  | cl28897 | Class_A |
| GSLYST00006887001 | non-specific | 320109 | 4   | 302 | 3.71E-24    | 99.2444 | cd14978   | 7tmA_FMRFamide_R-like     | -  | cl28897 | Class_A |
| GSLYST00006887001 | non-specific | 313536 | 9   | 172 | 5.82E-06    | 46.8216 | pfam10324 | 7TM_GPCR_Srw              | C  | cl21561 | Class_A |
| GSLYST00006888001 | non-specific | 320109 | 1   | 198 | 9.41E-13    | 65.3468 | cd14978   | 7tmA_FMRFamide_R-like     | N  | cl28897 | Class_A |
| GSLYST00006888001 | superfamily  | 330410 | 16  | 80  | 0.00513012  | 37.1243 | cl25589   | COG4262 superfamily       | NC | cl25589 | Class_A |
| GSLYST00006888001 | non-specific | 235139 | 16  | 80  | 0.00513012  | 37.1243 | PRK03612  | PRK03612                  | NC | cl25589 | Class_A |
| GSLYST00006911001 | non-specific | 320109 | 15  | 324 | 2.90E-20    | 88.844  | cd14978   | 7tmA_FMRFamide_R-like     | -  | cl28897 | Class_A |
| GSLYST00006911001 | non-specific | 313536 | 94  | 331 | 0.0013422   | 39.888  | pfam10324 | 7TM_GPCR_Srw              | N  | cl21561 | Class_A |
| GSLYST00006981001 | specific     | 320109 | 1   | 295 | 6.50E-77    | 237.531 | cd14978   | 7tmA_FMRFamide_R-like     | -  | cl28897 | Class_A |
| GSLYST00007050001 | non-specific | 313536 | 48  | 337 | 5.69E-09    | 56.8368 | pfam10324 | 7TM_GPCR_Srw              | -  | cl21561 | Class_A |
| GSLYST00007050001 | specific     | 320109 | 43  | 333 | 5.40E-54    | 180.521 | cd14978   | 7tmA_FMRFamide_R-like     | -  | cl28897 | Class_A |
| GSLYST00007051001 | non-specific | 320098 | 3   | 251 | 1.10E-41    | 143.087 | cd14967   | 7tmA_amine_R-like         | -  | cl28897 | Class_A |
| GSLYST00007051001 | non-specific | 222976 | 4   | 215 | 1.70E-08    | 54.0138 | PHA03087  | PHA03087                  | N  | cl27963 | Class_A |
| GSLYST00007052001 | non-specific | 320098 | 1   | 243 | 2.78E-30    | 113.427 | cd14967   | 7tmA_amine_R-like         | -  | cl28897 | Class_A |
| GSLYST00007053001 | specific     | 320086 | 1   | 217 | 2.64E-23    | 93.8792 | cd00637   | 7tm_classA_rhodopsin-like | -  | cl28897 | Class_A |
| GSLYST00007053001 | non-specific | 222976 | 31  | 213 | 0.00295149  | 37.8355 | PHA03087  | PHA03087                  | N  | cl27963 | Class_A |
| GSLYST00007054001 | specific     | 320086 | 2   | 304 | 3.45E-25    | 101.583 | cd00637   | 7tm_classA_rhodopsin-like | -  | cl28897 | Class_A |
| GSLYST00007054001 | non-specific | 222976 | 34  | 124 | 0.000282654 | 41.6874 | PHA03087  | PHA03087                  | NC | cl27963 | Class_A |
| GSLYST00007063001 | non-specific | 320098 | 1   | 299 | 3.60E-28    | 108.804 | cd14967   | 7tmA_amine_R-like         | -  | cl28897 | Class_A |
| GSLYST00007063001 | non-specific | 222976 | 29  | 88  | 0.0036763   | 38.2207 | PHA03087  | PHA03087                  | NC | cl27963 | Class_A |
| GSLYST00007064001 | non-specific | 320183 | 3   | 312 | 2.31E-20    | 88.7652 | cd15055   | 7tmA_TAARs                | -  | cl28897 | Class_A |
| GSLYST00007064001 | non-specific | 222976 | 29  | 87  | 0.00271972  | 38.6059 | PHA03087  | PHA03087                  | NC | cl27963 | Class_A |
| GSLYST00007065001 | non-specific | 320098 | 9   | 307 | 4.76E-34    | 124.983 | cd14967   | 7tmA_amine_R-like         | -  | cl28897 | Class_A |
| GSLYST00007065001 | non-specific | 222976 | 82  | 261 | 0.000394093 | 41.3022 | PHA03087  | PHA03087                  | NC | cl27963 | Class_A |
| GSLYST00007066001 | specific     | 320086 | 1   | 299 | 5.40E-26    | 104.28  | cd00637   | 7tm_classA_rhodopsin-like | -  | cl28897 | Class_A |
| GSLYST00007067001 | non-specific | 320183 | 2   | 68  | 1.54E-13    | 62.5716 | cd15055   | 7tmA_TAARs                | C  | cl28897 | Class_A |
| GSLYST00007067001 | non-specific | 222976 | 1   | 69  | 0.00739806  | 32.8279 | PHA03087  | PHA03087                  | NC | cl27963 | Class_A |
| GSLYST00007068001 | non-specific | 320098 | 1   | 307 | 5.03E-35    | 127.294 | cd14967   | 7tmA_amine_R-like         | -  | cl28897 | Class_A |
| GSLYST00007068001 | non-specific | 222976 | 29  | 155 | 7.05E-06    | 46.695  | PHA03087  | PHA03087                  | NC | cl27963 | Class_A |
| GSLYST00007069001 | non-specific | 320098 | 1   | 307 | 6.03E-34    | 124.598 | cd14967   | 7tmA_amine_R-like         | -  | cl28897 | Class_A |
| GSLYST00007069001 | non-specific | 222976 | 29  | 155 | 2.81E-06    | 47.8506 | PHA03087  | PHA03087                  | NC | cl27963 | Class_A |
| GSLYST00007070001 | specific     | 320086 | 3   | 288 | 2.98E-29    | 111.984 | cd00637   | 7tm_classA_rhodopsin-like | -  | cl28897 | Class_A |
| GSLYST00007070001 | non-specific | 222976 | 3   | 260 | 0.0069742   | 37.4503 | PHA03087  | PHA03087                  | C  | cl27963 | Class_A |
| GSLYST00007071001 | non-specific | 320109 | 20  | 300 | 1.75E-26    | 105.408 | cd14978   | 7tmA_FMRFamide_R-like     | -  | cl28897 | Class_A |
| GSLYST00007191001 | specific     | 320086 | 42  | 258 | 3.45E-24    | 102.739 | cd00637   | 7tm_classA_rhodopsin-like | C  | cl28897 | Class_A |
| GSLYST00007191001 | non-specific |        |     |     |             |         |           |                           |    |         |         |

|                    |              |        |     |     |             |         |            |                           |    |         |         |
|--------------------|--------------|--------|-----|-----|-------------|---------|------------|---------------------------|----|---------|---------|
| GSLYST00008092001  | specific     | 197566 | 68  | 101 | 2.18E-09    | 53.0209 | smart00192 | LDLa                      | -  | cI00104 | Class_A |
| GSLYST00008092001  | specific     | 238060 | 69  | 105 | 4.94E-09    | 52.209  | cd00112    | LDLa                      | -  | cI00104 | Class_A |
| GSLYST00008092001  | superfamily  | 294076 | 68  | 101 | 2.18E-09    | 53.0209 | cI00104    | LDLa superfamily          | -  | -       | Class_A |
| GSLYST00008092001  | specific     | 316378 | 266 | 326 | 6.00E-13    | 63.7002 | pfam13855  | LRR_8                     | -  | cI25992 | Class_A |
| GSLYST00008092001  | non-specific | 222976 | 405 | 634 | 5.72E-05    | 45.9246 | PHA03087   | PHA03087                  | C  | cI27963 | Class_A |
| GSLYST00008092001  | specific     | 227223 | 164 | 403 | 8.07E-14    | 73.8489 | COG4886    | LRR                       | N  | cI25992 | Class_A |
| GSLYST00008092001  | superfamily  | 330813 | 164 | 403 | 8.07E-14    | 73.8489 | cI25992    | LRR_8 superfamily         | N  | -       | Class_A |
| GSLYST00008092001  | non-specific | 238064 | 219 | 356 | 1.01E-08    | 57.3654 | cd00116    | LRR_RI                    | N  | cI26161 | Class_A |
| GSLYST00008092001  | superfamily  | 330982 | 219 | 356 | 1.01E-08    | 57.3654 | cI26161    | LRR_RI superfamily        | N  | -       | Class_A |
| GSLYST00008092001  | superfamily  | 330839 | 145 | 298 | 0.000814717 | 42.7618 | cI26018    | NEL superfamily           | NC | -       | Class_A |
| GSLYST00008092001  | non-specific | 185268 | 145 | 298 | 0.000814717 | 42.7618 | PRK15370   | PRK15370                  | NC | cI26018 | Class_A |
| GSLYST00008183001  | specific     | 320331 | 38  | 323 | 6.63E-137   | 394.664 | cd15203    | 7tmA_NPYR-like            | -  | cI28897 | Class_A |
| GSLYST00008183001  | non-specific | 222976 | 41  | 327 | 6.12E-24    | 101.779 | PHA03087   | PHA03087                  | -  | cI27963 | Class_A |
| GSLYST00008197001  | specific     | 320086 | 1   | 119 | 1.27E-12    | 63.0632 | cd00637    | 7tm_classA_rhodopsin-like | C  | cI28897 | Class_A |
| GSLYST00008271001  | non-specific | 320325 | 1   | 64  | 2.39E-23    | 99.4211 | cd15197    | 7tmA_NPSR                 | N  | cI28897 | Class_A |
| GSLYST00008328001  | non-specific | 320336 | 1   | 112 | 8.48E-20    | 83.5928 | cd15208    | 7tmA_OXR                  | N  | cI28897 | Class_A |
| GSLYST00008336001  | non-specific | 320140 | 150 | 216 | 7.72E-18    | 79.4103 | cd15012    | 7tmA_Trissin_R            | N  | cI28897 | Class_A |
| GSLYST00008337001  | non-specific | 320140 | 1   | 56  | 2.65E-10    | 52.8315 | cd15012    | 7tmA_Trissin_R            | NC | cI28897 | Class_A |
| GSLYST00008338001  | non-specific | 320140 | 1   | 55  | 3.29E-17    | 71.7063 | cd15012    | 7tmA_Trissin_R            | C  | cI28897 | Class_A |
| GSLYST000083478001 | non-specific | 320109 | 1   | 175 | 0.00011983  | 41.4644 | cd14978    | 7tmA_FMRFamide_R-like     | N  | cI28897 | Class_A |
| GSLYST00008531001  | non-specific | 320098 | 17  | 177 | 1.31E-05    | 44.4761 | cd14967    | 7tmA_amine_R-like         | N  | cI28897 | Class_A |
| GSLYST00008589001  | specific     | 320086 | 33  | 327 | 1.27E-13    | 70.382  | cd00637    | 7tm_classA_rhodopsin-like | -  | cI28897 | Class_A |
| GSLYST00008625001  | specific     | 313429 | 157 | 411 | 4.65E-62    | 205.17  | pfam10192  | GpcrRhopsn4               | -  | cI21735 | Class_A |
| GSLYST00008625001  | superfamily  | 328874 | 157 | 411 | 4.65E-62    | 205.17  | cI21735    | Lung_7-TM_R superfamily   | -  | -       | Class_A |
| GSLYST00008626001  | specific     | 313429 | 166 | 420 | 6.79E-57    | 192.073 | pfam10192  | GpcrRhopsn4               | -  | cI21735 | Class_A |
| GSLYST00008626001  | superfamily  | 328874 | 166 | 420 | 6.79E-57    | 192.073 | cI21735    | Lung_7-TM_R superfamily   | -  | -       | Class_A |
| GSLYST00008698001  | non-specific | 320109 | 8   | 300 | 1.01E-19    | 86.918  | cd14978    | 7tmA_FMRFamide_R-like     | -  | cI28897 | Class_A |
| GSLYST00008727001  | non-specific | 320109 | 38  | 336 | 1.21E-11    | 64.1912 | cd14978    | 7tmA_FMRFamide_R-like     | -  | cI28897 | Class_A |
| GSLYST00008729001  | non-specific | 313536 | 20  | 311 | 2.46E-07    | 51.0588 | pfam10324  | 7TM_GPCR_Srw              | -  | cI21561 | Class_A |
| GSLYST00008729001  | non-specific | 320109 | 14  | 311 | 8.09E-24    | 98.474  | cd14978    | 7tmA_FMRFamide_R-like     | -  | cI28897 | Class_A |
| GSLYST00008730001  | non-specific | 313536 | 22  | 316 | 5.00E-06    | 47.2068 | pfam10324  | 7TM_GPCR_Srw              | -  | cI21561 | Class_A |
| GSLYST00008730001  | non-specific | 320109 | 15  | 312 | 3.46E-21    | 91.1552 | cd14978    | 7tmA_FMRFamide_R-like     | -  | cI28897 | Class_A |
| GSLYST00008731001  | non-specific | 320109 | 16  | 309 | 3.44E-25    | 101.941 | cd14978    | 7tmA_FMRFamide_R-like     | -  | cI28897 | Class_A |
| GSLYST00008732001  | non-specific | 313536 | 23  | 316 | 1.23E-07    | 52.2144 | pfam10324  | 7TM_GPCR_Srw              | -  | cI21561 | Class_A |
| GSLYST00008732001  | non-specific | 320109 | 14  | 313 | 5.09E-25    | 101.941 | cd14978    | 7tmA_FMRFamide_R-like     | -  | cI28897 | Class_A |
| GSLYST00008733001  | non-specific | 313536 | 22  | 316 | 5.89E-11    | 62.2296 | pfam10324  | 7TM_GPCR_Srw              | -  | cI21561 | Class_A |
| GSLYST00008733001  | non-specific | 320109 | 16  | 313 | 6.31E-30    | 115.038 | cd14978    | 7tmA_FMRFamide_R-like     | -  | cI28897 | Class_A |
| GSLYST00008734001  | non-specific | 313536 | 29  | 322 | 1.21E-07    | 52.2144 | pfam10324  | 7TM_GPCR_Srw              | -  | cI21561 | Class_A |
| GSLYST00008734001  | non-specific | 320109 | 20  | 319 | 8.58E-26    | 103.867 | cd14978    | 7tmA_FMRFamide_R-like     | -  | cI28897 | Class_A |
| GSLYST00008740001  | non-specific | 320109 | 2   | 275 | 3.58E-16    | 76.5176 | cd14978    | 7tmA_FMRFamide_R-like     | -  | cI28897 | Class_A |
| GSLYST00008864001  | non-specific | 320109 | 1   | 338 | 2.45E-08    | 54.176  | cd14978    | 7tmA_FMRFamide_R-like     | -  | cI28897 | Class_A |
| GSLYST00009134001  | non-specific | 320265 | 437 | 718 | 6.18E-100   | 308.745 | cd15137    | 7tmA_Relaxin_R            | -  | cI28897 | Class_A |
| GSLYST00009134001  | non-specific | 278486 | 21  | 58  | 2.75E-06    | 44.1616 | pfam00057  | Ldl_recept_a              | -  | cI00104 | Class_A |
| GSLYST00009134001  | specific     | 238060 | 25  | 58  | 2.24E-07    | 47.2014 | cd00112    | LDLa                      | -  | cI00104 | Class_A |
| GSLYST00009134001  | specific     | 197566 | 22  | 55  | 2.40E-06    | 44.1613 | smart00192 | LDLa                      | -  | cI00104 | Class_A |
| GSLYST00009134001  | specific     | 238060 | 149 | 183 | 1.56E-05    | 42.1938 | cd00112    | LDLa                      | -  | cI00104 | Class_A |
| GSLYST00009134001  | specific     | 197566 | 149 | 180 | 0.000259287 | 38.3833 | smart00192 | LDLa                      | -  | cI00104 | Class_A |
| GSLYST00009134001  | superfamily  | 294076 | 25  | 58  | 2.24E-07    | 47.2014 | cI00104    | LDLa superfamily          | -  | -       | Class_A |
| GSLYST00009134001  | superfamily  | 294076 | 149 | 183 | 1.56E-05    | 42.1938 | cI00104    | LDLa superfamily          | -  | -       | Class_A |
| GSLYST00009134001  | specific     | 316378 | 274 | 331 | 1.01E-07    | 49.0627 | pfam13855  | LRR_8                     | -  | cI25992 | Class_A |
| GSLYST00009134001  | superfamily  | 330813 | 274 | 331 | 1.01E-07    | 49.0627 | cI25992    | LRR_8 superfamily         | -  | -       | Class_A |
| GSLYST00009134001  | non-specific | 222976 | 438 | 716 | 2.84E-06    | 49.7766 | PHA03087   | PHA03087                  | -  | cI27963 | Class_A |
| GSLYST00009134001  | specific     | 227223 | 202 | 359 | 0.00017448  | 44.1886 | COG4886    | LRR                       | NC | cI25992 | Class_A |
| GSLYST00009145001  | non-specific | 320109 | 43  | 356 | 2.01E-17    | 81.5252 | cd14978    | 7tmA_FMRFamide_R-like     | -  | cI28897 | Class_A |
| GSLYST00009145001  | non-specific | 313536 | 117 | 363 | 0.00683602  | 37.962  | pfam10324  | 7TM_GPCR_Srw              | N  | cI21561 | Class_A |
| GSLYST00009165001  | non-specific | 320109 | 1   | 242 | 1.94E-15    | 73.8212 | cd14978    | 7tmA_FMRFamide_R-like     | N  | cI28897 | Class_A |
| GSLYST00009166001  | non-specific | 320109 | 19  | 339 | 2.58E-24    | 100.4   | cd14978    | 7tmA_FMRFamide_R-like     | -  | cI28897 | Class_A |
| GSLYST00009179001  | non-specific | 320109 | 1   | 125 | 3.75E-05    | 43.0052 | cd14978    | 7tmA_FMRFamide_R-like     | C  | cI28897 | Class_A |
| GSLYST00009341001  | specific     | 320086 | 21  | 133 | 1.49E-21    | 93.494  | cd00637    | 7tm_classA_rhodopsin-like | C  | cI28897 | Class_A |
| GSLYST00009341001  | non-specific | 165021 | 14  | 123 | 7.96E-05    | 44.619  | PHA02638   | PHA02638                  | NC | cI27963 | Class_A |
| GSLYST00009352001  | non-specific | 320109 | 10  | 299 | 5.68E-18    | 82.2956 | cd14978    | 7tmA_FMRFamide_R-like     | -  | cI28897 | Class_A |
| GSLYST00009353001  | specific     | 320109 | 1   | 292 | 1.42E-30    | 116.193 | cd14978    | 7tmA_FMRFamide_R-like     | -  | cI28897 | Class_A |
| GSLYST00009353001  | non-specific | 222976 | 210 | 296 | 0.00287075  | 38.6059 | PHA03087   | PHA03087                  | N  | cI27963 | Class_A |
| GSLYST00009354001  | non-specific | 320109 | 1   | 294 | 1.05E-23    | 98.0888 | cd14978    | 7tmA_FMRFamide_R-like     | -  | cI28897 | Class_A |
| GSLYST00009367001  | specific     | 320109 | 28  | 318 | 6.94E-40    | 142.772 | cd14978    | 7tmA_FMRFamide_R-like     | -  | cI28897 | Class_A |
| GSLYST00009367001  | non-specific | 165021 | 22  | 327 | 5.20E-07    | 51.1674 | PHA02638   | PHA02638                  | N  | cI27963 | Class_A |
| GSLYST00009368001  | specific     | 320109 | 1   | 296 | 8.79E-35    | 127.749 | cd14978    | 7tmA_FMRFamide_R-like     | -  | cI28897 | Class_A |
| GSLYST00009368001  | non-specific | 165021 | 8   | 300 | 2.68E-07    | 51.1674 | PHA02638   | PHA02638                  | N  | cI27963 | Class_A |
| GSLYST00009369001  | non-specific | 320431 | 102 | 354 | 2.52E-05    | 45.2755 | cd15305    | 7tmA_5-HT2C               | -  | cI28897 | Class_A |
| GSLYST00009426001  | specific     | 320086 | 40  | 318 | 3.50E-13    | 69.6116 | cd00637    | 7tm_classA_rhodopsin-like | -  | cI28897 | Class_A |
| GSLYST00009501001  | non-specific | 320098 | 1   | 300 | 4.22E-26    | 103.412 | cd14967    | 7tmA_amine_R-like         | -  | cI28897 | Class_A |
| GSLYST00009501001  | non-specific | 165021 | 23  | 103 | 0.00309449  | 38.4558 | PHA02638   | PHA02638                  | NC | cI27963 | Class_A |
| GSLYST00009502001  | non-specific | 320183 | 2   | 309 | 1.45E-29    | 113.803 | cd15055    | 7tmA_TAARs                | -  | cI28897 | Class_A |
| GSLYST00009502001  | non-specific | 222976 | 4   | 165 | 0.00148863  | 39.7615 | PHA03087   | PHA03087                  | NC | cI27963 | Class_A |
| GSLYST00009503001  | specific     | 320086 | 2   | 280 | 7.28E-29    | 110.828 | cd00637    | 7tm_classA_rhodopsin-like | -  | cI28897 | Class_A |
| GSLYST00009503001  | non-specific | 165021 | 72  | 239 | 0.00625823  | 37.6854 | PHA02638   | PHA02638                  | NC | cI27963 | Class_A |
| GSLYST00009504001  | specific     | 320086 | 1   | 295 | 9.64E-29    | 110.828 | cd00637    | 7tm_classA_rhodopsin-like | -  | cI28897 | Class_A |
| GSLYST00009505001  | non-specific | 320098 | 14  | 282 | 1.88E-37    | 132.687 | cd14967    | 7tmA_amine_R-like         | -  | cI28897 | Class_A |
| GSLYST00009505001  | non-specific | 222976 | 15  | 248 | 0.00636877  | 37.4503 | PHA03087   | PHA03087                  | C  | cI27963 | Class_A |
| GSLYST00009506001  | specific     | 320086 | 2   | 288 | 4.60E-37    | 132.784 | cd00637    | 7tm_classA_rhodopsin-like | -  | cI28897 | Class_A |
| GSLYST00009506001  | non-specific | 222976 | 1   | 248 | 2.03E-06    | 48.2358 | PHA03087   | PHA03087                  | C  | cI27963 | Class_A |
| GSLYST00009507001  | non-specific | 320098 | 1   | 133 | 8.83E-11    | 58.3433 | cd14967    | 7tmA_amine_R-like         | C  | cI28897 | Class_A |
| GSLYST00009508001  | superfamily  | 333717 | 1   | 249 | 2.23E-35    | 126.909 | cI28897    | 7tm_GPCRs superfamily     | -  | -       | Class_A |
| GSLYST00009508001  | non-specific | 320098 | 1   | 249 | 2.23E-35    | 126.909 | cd14967    | 7tmA_amine_R-like         | -  | cI28897 | Class_A |
| GSLYST00009508001  | non-specific | 222976 | 29  | 154 | 5.08E-05    | 43.6134 | PHA03087   | PHA03087                  | NC | cI27963 | Class_A |
| GSLYST00009533001  | non-specific | 320109 | 18  | 92  | 6.21E-06    | 42.62   | cd14978    | 7tmA_FMRFamide_R-like     | C  | cI28897 | Class_A |
| GSLYST00009643001  | non-specific | 320099 | 7   | 285 | 2.25E-81    | 247.166 | cd14968    | 7tmA_Adenosine_R          | -  | cI28897 | Class_A |
| GSLYST00009643001  | non-specific | 222976 | 3   | 294 | 3.61E-08    | 53.6286 | PHA03087   | PHA03087                  | -  | cI27963 | Class_A |
| GSLYST00009644001  | non-specific | 320099 | 7   | 285 | 3.51E-73    | 225.98  | cd14968    | 7tmA_Adenosine_R          | -  | cI28897 | Class_A |
| GSLYST00009644001  | non-specific | 222976 | 3   | 292 | 8.03E-06    | 46.3098 | PHA03087   | PHA03087                  | -  | cI27963 | Class_A |
| GSLYST00009645001  | non-specific | 320099 | 17  | 295 | 5.06E-84    | 254.099 | cd14968    | 7tmA_Adenosine_R          | -  | cI28897 | Class_A |
| GSLYST00009645001  | non-specific | 222976 | 13  | 302 | 1.36E-09    | 57.8658 | PHA03087   | PHA03087                  | -  | cI27963 | Class_A |
| GSLYST00009646001  | non-specific | 320099 | 6   | 287 | 4.17E-103   | 315.346 | cd14968    | 7tmA_Adenosine_R          | -  | cI28897 | Class_A |
| GSLYST00009646001  | non-specific | 222976 | 2   | 292 | 1.92E-14    | 74.8146 | PHA03087   | PHA03087                  | -  | cI27963 | Class_A |
| GSLYST00009659001  | specific     | 320086 | 38  | 317 | 9.70E-34    | 124.695 | cd00637    | 7tm_classA_rhodopsin-like | -  | cI28897 | Class_A |
| GSLYST00009659001  | non-specific | 222976 | 16  | 239 | 0.00145886  | 39.7615 | PHA03087   | PHA03087                  | C  | cI27963 | Class_A |
| GSLYST00009660001  | specific     | 320086 | 39  | 307 | 1.92E-35    | 128.932 | cd00637    | 7tm_classA_rhodopsin-like | -  | cI28897 | Class_A |
| GSLYST00009661001  | specific     | 320086 | 1</ |     |             |         |            |                           |    |         |         |

|                    |              |        |     |      |             |         |            |                             |    |         |         |
|--------------------|--------------|--------|-----|------|-------------|---------|------------|-----------------------------|----|---------|---------|
| GSLYST00009693001  | specific     | 238060 | 400 | 437  | 1.54E-05    | 42.579  | cd00112    | LDLa                        | -  | cl00104 | Class_A |
| GSLYST00009693001  | specific     | 238060 | 442 | 477  | 1.78E-05    | 42.1938 | cd00112    | LDLa                        | -  | cl00104 | Class_A |
| GSLYST00009693001  | specific     | 197566 | 69  | 101  | 2.05E-05    | 42.2353 | smart00192 | LDLa                        | -  | cl00104 | Class_A |
| GSLYST00009693001  | specific     | 197566 | 442 | 474  | 3.80E-05    | 41.4649 | smart00192 | LDLa                        | -  | cl00104 | Class_A |
| GSLYST00009693001  | specific     | 197566 | 359 | 391  | 9.76E-05    | 40.3093 | smart00192 | LDLa                        | -  | cl00104 | Class_A |
| GSLYST00009693001  | specific     | 238060 | 189 | 221  | 0.000276331 | 39.1122 | cd00112    | LDLa                        | -  | cl00104 | Class_A |
| GSLYST00009693001  | specific     | 197566 | 400 | 432  | 0.000465398 | 38.3833 | smart00192 | LDLa                        | -  | cl00104 | Class_A |
| GSLYST00009693001  | specific     | 197566 | 190 | 218  | 0.000815086 | 37.6129 | smart00192 | LDLa                        | -  | cl00104 | Class_A |
| GSLYST00009693001  | superfamily  | 294076 | 320 | 355  | 3.39E-10    | 55.7176 | cl00104    | LDLa superfamily            | -  | -       | Class_A |
| GSLYST00009693001  | superfamily  | 294076 | 30  | 64   | 8.12E-07    | 46.0458 | cl00104    | LDLa superfamily            | -  | -       | Class_A |
| GSLYST00009693001  | superfamily  | 294076 | 69  | 104  | 1.48E-06    | 45.2754 | cl00104    | LDLa superfamily            | -  | -       | Class_A |
| GSLYST00009693001  | superfamily  | 294076 | 360 | 394  | 3.50E-06    | 44.505  | cl00104    | LDLa superfamily            | -  | -       | Class_A |
| GSLYST00009693001  | superfamily  | 294076 | 108 | 140  | 5.14E-06    | 43.7761 | cl00104    | LDLa superfamily            | -  | -       | Class_A |
| GSLYST00009693001  | superfamily  | 294076 | 400 | 437  | 1.54E-05    | 42.579  | cl00104    | LDLa superfamily            | -  | -       | Class_A |
| GSLYST00009693001  | superfamily  | 294076 | 442 | 477  | 1.78E-05    | 42.1938 | cl00104    | LDLa superfamily            | -  | -       | Class_A |
| GSLYST00009693001  | superfamily  | 294076 | 189 | 221  | 0.000276331 | 39.1122 | cl00104    | LDLa superfamily            | -  | -       | Class_A |
| GSLYST00009693001  | specific     | 316378 | 610 | 669  | 1.65E-14    | 68.7078 | pfam13855  | LRR_8                       | -  | cl25992 | Class_A |
| GSLYST00009693001  | non-specific | 222976 | 732 | 1005 | 0.00132777  | 42.0726 | PHA03087   | PHA03087                    | -  | cl27963 | Class_A |
| GSLYST00009693001  | non-specific | 238064 | 506 | 701  | 2.32E-05    | 47.3502 | cd00116    | LRR_RI                      | C  | cl26161 | Class_A |
| GSLYST00009693001  | superfamily  | 330982 | 506 | 701  | 2.32E-05    | 47.3502 | cl26161    | LRR_RI superfamily          | C  | -       | Class_A |
| GSLYST00009693001  | non-specific | 278486 | 76  | 104  | 0.00574538  | 35.302  | pfam00057  | Ldl_recept_a                | N  | cl00104 | Class_A |
| GSLYST00009693001  | specific     | 227223 | 538 | 672  | 3.58E-16    | 81.5529 | COG4886    | LRR                         | NC | cl25992 | Class_A |
| GSLYST00009693001  | superfamily  | 330813 | 538 | 672  | 3.58E-16    | 81.5529 | cl25992    | LRR_8 superfamily           | NC | -       | Class_A |
| GSLYST00009693001  | non-specific | 215061 | 536 | 718  | 7.39E-06    | 49.8464 | PLN00113   | PLN00113                    | NC | cl26793 | Class_A |
| GSLYST00009693001  | superfamily  | 331614 | 536 | 718  | 7.39E-06    | 49.8464 | cl26793    | PLN00113 superfamily        | NC | -       | Class_A |
| GSLYST00009799001  | specific     | 320124 | 3   | 289  | 7.48E-84    | 254.061 | cd14993    | 7tmA_CCKR-like              | -  | cl28897 | Class_A |
| GSLYST00009799001  | non-specific | 222976 | 7   | 285  | 1.17E-06    | 49.0062 | PHA03087   | PHA03087                    | -  | cl27963 | Class_A |
| GSLYST00009928001  | non-specific | 320109 | 17  | 314  | 1.87E-15    | 75.362  | cd14978    | 7tmA_FMRFamide_R-like       | -  | cl28897 | Class_A |
| GSLYST00009932001  | non-specific | 320128 | 32  | 330  | 3.63E-97    | 289.575 | cd14997    | 7tmA_ETH-R                  | -  | cl28897 | Class_A |
| GSLYST00009932001  | non-specific | 222976 | 1   | 334  | 6.86E-15    | 74.4294 | PHA03087   | PHA03087                    | -  | cl27963 | Class_A |
| GSLYST00009949001  | specific     | 320109 | 25  | 307  | 1.80E-54    | 179.366 | cd14978    | 7tmA_FMRFamide_R-like       | -  | cl28897 | Class_A |
| GSLYST00009949001  | non-specific | 165021 | 25  | 262  | 1.48E-10    | 61.1826 | PHA02638   | PHA02638                    | N  | cl27963 | Class_A |
| GSLYST00009951001  | non-specific | 320124 | 17  | 137  | 1.32E-08    | 51.446  | cd14993    | 7tmA_CCKR-like              | C  | cl28897 | Class_A |
| GSLYST00009969001  | non-specific | 320109 | 1   | 137  | 1.78E-07    | 49.9388 | cd14978    | 7tmA_FMRFamide_R-like       | C  | cl28897 | Class_A |
| GSLYST00009970001  | non-specific | 320109 | 3   | 143  | 1.89E-06    | 47.2424 | cd14978    | 7tmA_FMRFamide_R-like       | C  | cl28897 | Class_A |
| GSLYST000010013001 | non-specific | 320109 | 7   | 310  | 7.75E-27    | 106.948 | cd14978    | 7tmA_FMRFamide_R-like       | -  | cl28897 | Class_A |
| GSLYST000010013001 | non-specific | 222976 | 7   | 150  | 0.00193709  | 39.3763 | PHA03087   | PHA03087                    | C  | cl27963 | Class_A |
| GSLYST000010015001 | superfamily  | 333717 | 407 | 688  | 8.96E-91    | 284.093 | cl28897    | 7tm_GPCRs superfamily       | -  | -       | Class_A |
| GSLYST000010015001 | non-specific | 320265 | 407 | 688  | 8.96E-91    | 284.093 | cd15137    | 7tmA_Relaxin_R              | -  | cl28897 | Class_A |
| GSLYST000010015001 | non-specific | 278486 | 21  | 56   | 1.08E-05    | 42.6208 | pfam00057  | Ldl_recept_a                | -  | cl00104 | Class_A |
| GSLYST000010015001 | specific     | 238060 | 23  | 56   | 2.82E-08    | 49.8978 | cd00112    | LDLa                        | -  | cl00104 | Class_A |
| GSLYST000010015001 | specific     | 197566 | 23  | 53   | 4.76E-08    | 49.1689 | smart00192 | LDLa                        | -  | cl00104 | Class_A |
| GSLYST000010015001 | specific     | 197566 | 107 | 138  | 0.000204033 | 38.7685 | smart00192 | LDLa                        | -  | cl00104 | Class_A |
| GSLYST000010015001 | specific     | 238060 | 107 | 138  | 0.00037858  | 37.9566 | cd00112    | LDLa                        | -  | cl00104 | Class_A |
| GSLYST000010015001 | superfamily  | 294076 | 23  | 56   | 2.82E-08    | 49.8978 | cl00104    | LDLa superfamily            | -  | -       | Class_A |
| GSLYST000010015001 | superfamily  | 294076 | 107 | 138  | 0.000204033 | 38.7685 | cl00104    | LDLa superfamily            | -  | -       | Class_A |
| GSLYST000010015001 | specific     | 316378 | 237 | 303  | 9.66E-05    | 40.5883 | pfam13855  | LRR_8                       | -  | cl25992 | Class_A |
| GSLYST000010015001 | superfamily  | 330813 | 237 | 303  | 9.66E-05    | 40.5883 | cl25992    | LRR_8 superfamily           | -  | -       | Class_A |
| GSLYST000010015001 | specific     | 316378 | 293 | 335  | 1.27E-06    | 45.5959 | pfam13855  | LRR_8                       | C  | cl25992 | Class_A |
| GSLYST000010015001 | superfamily  | 330813 | 293 | 335  | 1.27E-06    | 45.5959 | cl25992    | LRR_8 superfamily           | C  | -       | Class_A |
| GSLYST000010015001 | non-specific | 215061 | 176 | 328  | 0.000287054 | 44.0685 | PLN00113   | PLN00113                    | C  | cl26793 | Class_A |
| GSLYST000010015001 | superfamily  | 331614 | 176 | 328  | 0.000287054 | 44.0685 | cl26793    | PLN00113 superfamily        | C  | -       | Class_A |
| GSLYST000010015001 | specific     | 227223 | 205 | 334  | 4.77E-06    | 49.1962 | COG4886    | LRR                         | NC | cl25992 | Class_A |
| GSLYST000010016001 | non-specific | 278431 | 421 | 684  | 2.41E-15    | 76.192  | pfam00001  | 7tm_1                       | -  | cl27963 | Class_A |
| GSLYST000010016001 | superfamily  | 332784 | 421 | 684  | 2.41E-15    | 76.192  | cl27963    | 7tm_1 superfamily           | -  | -       | Class_A |
| GSLYST000010016001 | superfamily  | 333717 | 406 | 685  | 2.87E-95    | 296.034 | cl28897    | 7tm_GPCRs superfamily       | -  | -       | Class_A |
| GSLYST000010016001 | non-specific | 320265 | 406 | 685  | 2.87E-95    | 296.034 | cd15137    | 7tmA_Relaxin_R              | -  | cl28897 | Class_A |
| GSLYST000010016001 | non-specific | 278486 | 7   | 36   | 6.93E-06    | 43.006  | pfam00057  | Ldl_recept_a                | -  | cl00104 | Class_A |
| GSLYST000010016001 | specific     | 238060 | 7   | 36   | 1.11E-08    | 51.0534 | cd00112    | LDLa                        | -  | cl00104 | Class_A |
| GSLYST000010016001 | specific     | 197566 | 7   | 33   | 9.40E-08    | 48.3985 | smart00192 | LDLa                        | -  | cl00104 | Class_A |
| GSLYST000010016001 | specific     | 197566 | 77  | 108  | 0.00213089  | 36.0721 | smart00192 | LDLa                        | -  | cl00104 | Class_A |
| GSLYST000010016001 | specific     | 238060 | 77  | 108  | 0.00256835  | 35.6454 | cd00112    | LDLa                        | -  | cl00104 | Class_A |
| GSLYST000010016001 | superfamily  | 294076 | 7   | 36   | 1.11E-08    | 51.0534 | cl00104    | LDLa superfamily            | -  | -       | Class_A |
| GSLYST000010016001 | superfamily  | 294076 | 77  | 108  | 0.00213089  | 36.0721 | cl00104    | LDLa superfamily            | -  | -       | Class_A |
| GSLYST000010016001 | specific     | 316378 | 236 | 301  | 6.66E-06    | 43.6699 | pfam13855  | LRR_8                       | -  | cl25992 | Class_A |
| GSLYST000010016001 | superfamily  | 330813 | 236 | 301  | 6.66E-06    | 43.6699 | cl25992    | LRR_8 superfamily           | -  | -       | Class_A |
| GSLYST000010016001 | specific     | 197566 | 38  | 62   | 0.000743772 | 37.2277 | smart00192 | LDLa                        | -  | cl00104 | Class_A |
| GSLYST000010016001 | specific     | 238060 | 43  | 62   | 0.00242103  | 35.6454 | cd00112    | LDLa                        | C  | cl00104 | Class_A |
| GSLYST000010016001 | superfamily  | 294076 | 38  | 62   | 0.000743772 | 37.2277 | cl00104    | LDLa superfamily            | C  | -       | Class_A |
| GSLYST000010016001 | specific     | 238060 | 131 | 153  | 0.000628797 | 37.5714 | cd00112    | LDLa                        | N  | cl00104 | Class_A |
| GSLYST000010016001 | specific     | 197566 | 131 | 150  | 0.00797114  | 34.1461 | smart00192 | LDLa                        | N  | cl00104 | Class_A |
| GSLYST000010016001 | superfamily  | 294076 | 131 | 153  | 0.000628797 | 37.5714 | cl00104    | LDLa superfamily            | N  | -       | Class_A |
| GSLYST000010016001 | non-specific | 238064 | 217 | 345  | 0.00221754  | 40.4166 | cd00116    | LRR_RI                      | N  | cl26161 | Class_A |
| GSLYST000010016001 | superfamily  | 330982 | 217 | 345  | 0.00221754  | 40.4166 | cl26161    | LRR_RI superfamily          | N  | -       | Class_A |
| GSLYST000010016001 | specific     | 227223 | 179 | 344  | 0.000933359 | 41.8774 | COG4886    | LRR                         | NC | cl25992 | Class_A |
| GSLYST000010016001 | non-specific | 165021 | 407 | 537  | 0.000248567 | 43.8486 | PHA02638   | PHA02638                    | -  | cl27963 | Class_A |
| GSLYST0000191001   | non-specific | 320109 | 1   | 288  | 9.97E-24    | 97.7036 | cd14978    | 7tmA_FMRFamide_R-like       | -  | cl28897 | Class_A |
| GSLYST0000191001   | non-specific | 222976 | 2   | 298  | 0.000244857 | 41.6874 | PHA03087   | PHA03087                    | -  | cl27963 | Class_A |
| GSLYST0000192001   | non-specific | 320109 | 1   | 293  | 2.07E-27    | 107.719 | cd14978    | 7tmA_FMRFamide_R-like       | -  | cl28897 | Class_A |
| GSLYST0000192001   | non-specific | 222976 | 6   | 290  | 0.000174664 | 42.4578 | PHA03087   | PHA03087                    | -  | cl27963 | Class_A |
| GSLYST0000193001   | non-specific | 313540 | 9   | 204  | 8.36E-07    | 47.9541 | pfam10328  | 7TM_GPCR_Srx                | C  | cl21561 | Class_A |
| GSLYST0000193001   | non-specific | 320109 | 6   | 204  | 1.06E-19    | 84.6068 | cd14978    | 7tmA_FMRFamide_R-like       | C  | cl28897 | Class_A |
| GSLYST0000193001   | non-specific | 222976 | 9   | 204  | 0.00363736  | 37.4503 | PHA03087   | PHA03087                    | C  | cl27963 | Class_A |
| GSLYST000019333001 | non-specific | 320109 | 34  | 247  | 2.01E-12    | 65.3468 | cd14978    | 7tmA_FMRFamide_R-like       | N  | cl28897 | Class_A |
| GSLYST000019366001 | specific     | 320086 | 10  | 267  | 8.75E-34    | 123.925 | cd00637    | 7tm_classA_rhodopsin-like   | -  | cl28897 | Class_A |
| GSLYST000019366001 | non-specific | 222976 | 17  | 227  | 4.50E-05    | 43.9986 | PHA03087   | PHA03087                    | NC | cl27963 | Class_A |
| GSLYST000019367001 | specific     | 320086 | 1   | 242  | 1.93E-36    | 129.318 | cd00637    | 7tm_classA_rhodopsin-like   | -  | cl28897 | Class_A |
| GSLYST000019367001 | non-specific | 222976 | 1   | 204  | 2.55E-11    | 62.103  | PHA03087   | PHA03087                    | NC | cl27963 | Class_A |
| GSLYST000019503001 | specific     | 320086 | 36  | 308  | 1.06E-61    | 200.965 | cd00637    | 7tm_classA_rhodopsin-like   | -  | cl28897 | Class_A |
| GSLYST000019503001 | non-specific | 222976 | 43  | 314  | 4.55E-17    | 81.7482 | PHA03087   | PHA03087                    | -  | cl27963 | Class_A |
| GSLYST000019503001 | non-specific | 223664 | 31  | 277  | 0.00122823  | 40.7478 | COG0591    | PutP                        | N  | cl00456 | Class_A |
| GSLYST000019503001 | superfamily  | 320982 | 31  | 277  | 0.00122823  | 40.7478 | cl00456    | SLC5-6-like_sbd superfamily | N  | -       | Class_A |
| GSLYST000019575001 | specific     | 320086 | 51  | 327  | 1.32E-50    | 170.919 | cd00637    | 7tm_classA_rhodopsin-like   | -  | cl28897 | Class_A |
| GSLYST000019575001 | non-specific | 165021 | 53  | 339  | 9.19E-08    | 53.4786 | PHA02638   | PHA02638                    | N  | cl27963 | Class_A |
| GSLYST000019803001 | non-specific | 320109 | 56  | 355  | 7.96E-29    | 113.112 | cd14978    | 7tmA_FMRFamide_R-like       | -  | cl28897 | Class_A |
| GSLYST000019803001 | non-specific | 165021 | 60  | 268  | 0.00717602  | 38.0706 | PHA02638   | PHA02638                    | NC | cl27963 | Class_A |
| GSLYST000019804001 | non-specific | 313536 | 8   | 308  | 5.81E-10    | 59.148  | pfam10324  | 7TM_GPCR_Srw                | -  | cl21561 | Class_A |
| GSLYST000019804001 | non-specific | 320109 | 4   | 303  | 4.61E-25    | 101.941 | cd14978    | 7tmA_FMRFamide_R-like       | -  | cl28897 | Class_A |
| GSLYST000019805001 | non-specific | 313536 | 8   |      |             |         |            |                             |    |         |         |

|                   |              |        |     |     |             |         |           |                           |    |         |         |
|-------------------|--------------|--------|-----|-----|-------------|---------|-----------|---------------------------|----|---------|---------|
| GSLYST00010924001 | non-specific | 320109 | 27  | 356 | 5.31E-11    | 62.6504 | cd14978   | 7tmA_FMRFamide_R-like     | -  | cd28897 | Class_A |
| GSLYST00011001001 | non-specific | 320109 | 66  | 350 | 1.90E-14    | 73.0508 | cd14978   | 7tmA_FMRFamide_R-like     | -  | cd28897 | Class_A |
| non-specific      |              | 313540 | 100 | 229 | 7.89E-05    | 43.7169 | pfam10328 | 7TM_GPCR_Srx              | C  | cd21561 | Class_A |
| GSLYST00011039001 | non-specific | 320109 | 4   | 125 | 4.21E-11    | 58.028  | cd14978   | 7tmA_FMRFamide_R-like     | C  | cd28897 | Class_A |
| GSLYST00011049001 | specific     | 320086 | 50  | 238 | 7.38E-28    | 111.213 | cd00637   | 7tm_classA_rhodopsin-like | C  | cd28897 | Class_A |
| GSLYST00011049001 | non-specific | 322976 | 52  | 168 | 3.33E-07    | 51.7026 | PHAO3087  | PHAO3087                  | C  | cd27963 | Class_A |
| GSLYST00011049001 | non-specific | 320453 | 372 | 437 | 1.25E-05    | 46.5104 | cd15330   | 7tmA_5-HT1A Vertebrates   | N  | cd28897 | Class_A |
| GSLYST00011074001 | specific     | 320109 | 17  | 365 | 2.39E-32    | 122.742 | cd14978   | 7tmA_FMRFamide_R-like     | -  | cd28897 | Class_A |
| GSLYST00011123001 | non-specific | 320109 | 32  | 323 | 9.94E-17    | 78.8288 | cd14978   | 7tmA_FMRFamide_R-like     | -  | cd28897 | Class_A |
| GSLYST00011124001 | non-specific | 320109 | 30  | 327 | 3.24E-19    | 86.1476 | cd14978   | 7tmA_FMRFamide_R-like     | -  | cd28897 | Class_A |
| GSLYST00011218001 | non-specific | 320109 | 56  | 348 | 1.29E-22    | 96.548  | cd14978   | 7tmA_FMRFamide_R-like     | -  | cd28897 | Class_A |
| GSLYST00011227001 | specific     | 320086 | 22  | 291 | 1.57E-14    | 71.9228 | cd00637   | 7tm_classA_rhodopsin-like | -  | cd28897 | Class_A |
| GSLYST00011256001 | non-specific | 313536 | 40  | 335 | 1.00E-10    | 61.8444 | pfam10324 | 7TM_GPCR_Srw              | -  | cd21561 | Class_A |
| GSLYST00011256001 | non-specific | 320109 | 34  | 330 | 2.05E-26    | 106.178 | cd14978   | 7tmA_FMRFamide_R-like     | -  | cd28897 | Class_A |
| GSLYST00011405001 | non-specific | 320109 | 22  | 251 | 1.32E-30    | 115.038 | cd14978   | 7tmA_FMRFamide_R-like     | N  | cd28897 | Class_A |
| GSLYST00011498001 | specific     | 320086 | 17  | 275 | 3.28E-19    | 86.1752 | cd00637   | 7tm_classA_rhodopsin-like | -  | cd28897 | Class_A |
| GSLYST00011508001 | specific     | 320454 | 120 | 515 | 5.45E-137   | 396.725 | cd15331   | 7tmA_5-HT1A_invertebrates | -  | cd28897 | Class_A |
| non-specific      |              | 322976 | 134 | 255 | 1.03E-05    | 47.4654 | PHAO3087  | PHAO3087                  | C  | cd27963 | Class_A |
| GSLYST00011518001 | specific     | 320086 | 49  | 389 | 4.86E-34    | 127.777 | cd00637   | 7tm_classA_rhodopsin-like | -  | cd28897 | Class_A |
| GSLYST00011518001 | non-specific | 165021 | 51  | 176 | 4.91E-05    | 45.0042 | PHAO2638  | PHAO2638                  | NC | cd27963 | Class_A |
| GSLYST00011575001 | non-specific | 320109 | 50  | 349 | 2.22E-08    | 54.5612 | cd14978   | 7tmA_FMRFamide_R-like     | -  | cd28897 | Class_A |
| GSLYST00011644001 | non-specific | 320109 | 4   | 24  | 0.00141177  | 34.1457 | cd14978   | 7tmA_FMRFamide_R-like     | N  | cd28897 | Class_A |
| GSLYST00011645001 | specific     | 320109 | 2   | 300 | 1.67E-47    | 160.876 | cd14978   | 7tmA_FMRFamide_R-like     | -  | cd28897 | Class_A |
| GSLYST00011666001 | non-specific | 320309 | 41  | 87  | 0.00905915  | 33.1832 | cd15181   | 7tmA_XCR5                 | C  | cd28897 | Class_A |
| GSLYST00011682001 | non-specific | 320109 | 62  | 351 | 6.69E-22    | 94.2368 | cd14978   | 7tmA_FMRFamide_R-like     | -  | cd28897 | Class_A |
| GSLYST00011733001 | non-specific | 320429 | 93  | 282 | 2.32E-98    | 299.736 | cd15302   | 7tmA_machR_GAR-2-like     | C  | cd28897 | Class_A |
| GSLYST00011733001 | non-specific | 121564 | 308 | 451 | 0.00833664  | 38.9847 | cd11674   | lambda-1                  | C  | cd17035 | Class_A |
| GSLYST00011733001 | non-specific | 222976 | 107 | 295 | 7.65E-09    | 57.4806 | PHAO3087  | PHAO3087                  | C  | cd27963 | Class_A |
| GSLYST00011733001 | non-specific | 320429 | 493 | 567 | 1.06E-35    | 134.485 | cd15302   | 7tmA_machR_GAR-2-like     | N  | cd28897 | Class_A |
| GSLYST00011733001 | non-specific | 222976 | 491 | 571 | 0.000108476 | 44.3838 | PHAO3087  | PHAO3087                  | N  | cd27963 | Class_A |
| GSLYST00011749001 | specific     | 320086 | 24  | 296 | 1.11E-31    | 118.917 | cd00637   | 7tm_classA_rhodopsin-like | -  | cd28897 | Class_A |
| GSLYST00011750001 | specific     | 320086 | 22  | 296 | 4.03E-30    | 114.68  | cd00637   | 7tm_classA_rhodopsin-like | -  | cd28897 | Class_A |
| GSLYST00011751001 | superfamily  | 333717 | 17  | 289 | 5.30E-30    | 113.427 | cd28897   | 7tm_GPCRs superfamily     | -  | -       | Class_A |
| GSLYST00011751001 | non-specific | 320098 | 17  | 289 | 5.30E-30    | 113.427 | cd14967   | 7tmA_amine_R-like         | -  | cd28897 | Class_A |
| GSLYST00011825001 | specific     | 320112 | 52  | 349 | 9.28E-88    | 268.345 | cd14981   | 7tmA_Prostanoid_R         | -  | cd28897 | Class_A |
| GSLYST00011881001 | specific     | 320086 | 49  | 367 | 2.75E-21    | 93.494  | cd00637   | 7tm_classA_rhodopsin-like | -  | cd28897 | Class_A |
| GSLYST00011887001 | specific     | 320177 | 100 | 437 | 8.68E-117   | 341.988 | cd15049   | 7tmA_machR                | -  | cd28897 | Class_A |
| non-specific      |              | 222976 | 102 | 295 | 1.85E-13    | 70.9626 | PHAO3087  | PHAO3087                  | C  | cd27963 | Class_A |
| GSLYST00011888001 | non-specific | 320177 | 2   | 41  | 4.76E-20    | 79.6668 | cd15049   | 7tmA_machR                | N  | cd28897 | Class_A |
| GSLYST00011952001 | non-specific | 320181 | 2   | 336 | 2.86E-87    | 263.052 | cd15053   | 7tmA_D2-like_dopamine_R   | N  | cd28897 | Class_A |
| GSLYST00011952001 | non-specific | 222976 | 21  | 130 | 3.84E-09    | 57.0954 | PHAO3087  | PHAO3087                  | NC | cd27963 | Class_A |
| GSLYST00011979001 | non-specific | 313536 | 53  | 374 | 0.000337017 | 41.814  | pfam10324 | 7TM_GPCR_Srw              | -  | cd21561 | Class_A |
| GSLYST00011979001 | non-specific | 320109 | 55  | 367 | 3.32E-18    | 83.8364 | cd14978   | 7tmA_FMRFamide_R-like     | -  | cd28897 | Class_A |
| GSLYST00011993001 | specific     | 320109 | 1   | 412 | 3.01E-45    | 158.565 | cd14978   | 7tmA_FMRFamide_R-like     | -  | cd28897 | Class_A |
| GSLYST00011993001 | non-specific | 313536 | 2   | 210 | 6.24E-15    | 74.9412 | pfam10324 | 7TM_GPCR_Srw              | C  | cd21561 | Class_A |
| GSLYST00011993001 | non-specific | 222976 | 7   | 148 | 1.90E-08    | 55.5546 | PHAO3087  | PHAO3087                  | C  | cd27963 | Class_A |
| GSLYST00012013001 | non-specific | 320109 | 4   | 292 | 5.89E-27    | 106.563 | cd14978   | 7tmA_FMRFamide_R-like     | -  | cd28897 | Class_A |
| GSLYST00012029001 | specific     | 320112 | 42  | 336 | 3.18E-95    | 288.76  | cd14981   | 7tmA_Prostanoid_R         | -  | cd28897 | Class_A |
| GSLYST00012029001 | non-specific | 222976 | 44  | 180 | 5.33E-05    | 44.769  | PHAO3087  | PHAO3087                  | C  | cd27963 | Class_A |
| GSLYST00012068001 | non-specific | 320109 | 3   | 120 | 2.33E-07    | 47.2424 | cd14978   | 7tmA_FMRFamide_R-like     | C  | cd28897 | Class_A |
| GSLYST00012097001 | non-specific | 320511 | 1   | 288 | 2.24E-131   | 373.982 | cd15389   | 7tmA_GPR83                | -  | cd28897 | Class_A |
| GSLYST00012097001 | non-specific | 222976 | 1   | 289 | 2.22E-22    | 94.4598 | PHAO3087  | PHAO3087                  | -  | cd27963 | Class_A |
| non-specific      |              | 320222 | 31  | 310 | 1.10E-131   | 377.201 | cd15094   | 7tmA_AstC_insect          | -  | cd28897 | Class_A |
| GSLYST00012110001 | non-specific | 165021 | 29  | 315 | 4.73E-34    | 129.748 | PHAO2638  | PHAO2638                  | N  | cd27963 | Class_A |
| GSLYST00012114001 | non-specific | 320109 | 62  | 329 | 2.15E-17    | 81.14   | cd14978   | 7tmA_FMRFamide_R-like     | -  | cd28897 | Class_A |
| GSLYST00012115001 | non-specific | 320109 | 9   | 306 | 1.58E-20    | 89.6144 | cd14978   | 7tmA_FMRFamide_R-like     | -  | cd28897 | Class_A |
| GSLYST00012117001 | non-specific | 320109 | 19  | 313 | 1.67E-24    | 100.4   | cd14978   | 7tmA_FMRFamide_R-like     | -  | cd28897 | Class_A |
| GSLYST00012119001 | non-specific | 320109 | 17  | 313 | 4.98E-22    | 93.4664 | cd14978   | 7tmA_FMRFamide_R-like     | -  | cd28897 | Class_A |
| GSLYST00012120001 | non-specific | 320109 | 1   | 287 | 8.10E-20    | 87.3032 | cd14978   | 7tmA_FMRFamide_R-like     | -  | cd28897 | Class_A |
| GSLYST00012121001 | non-specific | 320123 | 51  | 166 | 6.32E-06    | 44.731  | cd14992   | 7tmA_TACR_family          | N  | cd28897 | Class_A |
| GSLYST00012122001 | non-specific | 320109 | 16  | 311 | 2.18E-22    | 94.622  | cd14978   | 7tmA_FMRFamide_R-like     | -  | cd28897 | Class_A |
| GSLYST00012123001 | non-specific | 320109 | 23  | 313 | 2.10E-18    | 83.4512 | cd14978   | 7tmA_FMRFamide_R-like     | -  | cd28897 | Class_A |
| GSLYST00012123001 | superfamily  | 331954 | 15  | 92  | 0.00351615  | 38.6661 | cd27133   | GcPe superfamily          | NC | -       | Class_A |
| GSLYST00012123001 | non-specific | 234812 | 15  | 92  | 0.00351615  | 38.6661 | PRK00694  | PRK00694                  | NC | cd27133 | Class_A |
| GSLYST00012124001 | non-specific | 320109 | 17  | 311 | 7.20E-25    | 101.556 | cd14978   | 7tmA_FMRFamide_R-like     | -  | cd28897 | Class_A |
| GSLYST00012125001 | non-specific | 320109 | 18  | 313 | 2.56E-21    | 91.9256 | cd14978   | 7tmA_FMRFamide_R-like     | -  | cd28897 | Class_A |
| GSLYST00012126001 | non-specific | 320109 | 18  | 313 | 1.66E-20    | 89.6144 | cd14978   | 7tmA_FMRFamide_R-like     | -  | cd28897 | Class_A |
| GSLYST00012127001 | non-specific | 320109 | 15  | 305 | 1.15E-17    | 81.14   | cd14978   | 7tmA_FMRFamide_R-like     | -  | cd28897 | Class_A |
| GSLYST00012128001 | non-specific | 313536 | 18  | 317 | 1.80E-06    | 48.3624 | pfam10324 | 7TM_GPCR_Srw              | -  | cd21561 | Class_A |
| GSLYST00012128001 | non-specific | 320109 | 16  | 311 | 1.76E-20    | 89.2292 | cd14978   | 7tmA_FMRFamide_R-like     | -  | cd28897 | Class_A |
| GSLYST00012129001 | non-specific | 320109 | 15  | 309 | 2.75E-21    | 91.5404 | cd14978   | 7tmA_FMRFamide_R-like     | -  | cd28897 | Class_A |
| GSLYST00012130001 | non-specific | 320109 | 30  | 316 | 2.22E-24    | 100.015 | cd14978   | 7tmA_FMRFamide_R-like     | -  | cd28897 | Class_A |
| GSLYST00012131001 | non-specific | 320109 | 1   | 184 | 4.64E-09    | 54.176  | cd14978   | 7tmA_FMRFamide_R-like     | C  | cd28897 | Class_A |
| GSLYST00012132001 | non-specific | 320109 | 23  | 314 | 6.09E-24    | 98.8592 | cd14978   | 7tmA_FMRFamide_R-like     | -  | cd28897 | Class_A |
| GSLYST00012133001 | non-specific | 320109 | 17  | 72  | 3.71E-05    | 44.546  | cd14978   | 7tmA_FMRFamide_R-like     | C  | cd28897 | Class_A |
| GSLYST00012134001 | non-specific | 320109 | 23  | 317 | 8.00E-22    | 93.4664 | cd14978   | 7tmA_FMRFamide_R-like     | -  | cd28897 | Class_A |
| GSLYST00012135001 | non-specific | 320109 | 16  | 311 | 2.37E-23    | 97.3184 | cd14978   | 7tmA_FMRFamide_R-like     | -  | cd28897 | Class_A |
| GSLYST00012136001 | non-specific | 313536 | 22  | 317 | 1.44E-09    | 57.9924 | pfam10324 | 7TM_GPCR_Srw              | -  | cd21561 | Class_A |
| GSLYST00012136001 | non-specific | 320109 | 16  | 310 | 5.20E-21    | 90.77   | cd14978   | 7tmA_FMRFamide_R-like     | -  | cd28897 | Class_A |
| GSLYST00012137001 | non-specific | 320109 | 25  | 316 | 1.91E-29    | 114.267 | cd14978   | 7tmA_FMRFamide_R-like     | -  | cd28897 | Class_A |
| GSLYST00012138001 | non-specific | 320109 | 18  | 313 | 9.80E-26    | 103.867 | cd14978   | 7tmA_FMRFamide_R-like     | -  | cd28897 | Class_A |
| GSLYST00012139001 | non-specific | 320109 | 10  | 307 | 7.14E-06    | 46.8572 | cd14978   | 7tmA_FMRFamide_R-like     | -  | cd28897 | Class_A |
| GSLYST00012140001 | non-specific | 320109 | 31  | 330 | 3.01E-24    | 100.015 | cd14978   | 7tmA_FMRFamide_R-like     | -  | cd28897 | Class_A |
| GSLYST00012180001 | non-specific | 320109 | 18  | 313 | 6.37E-22    | 93.4664 | cd14978   | 7tmA_FMRFamide_R-like     | -  | cd28897 | Class_A |
| GSLYST00012217001 | non-specific | 320109 | 42  | 338 | 1.31E-23    | 98.474  | cd14978   | 7tmA_FMRFamide_R-like     | -  | cd28897 | Class_A |
| GSLYST00012218001 | non-specific | 320109 | 45  | 341 | 2.97E-25    | 103.096 | cd14978   | 7tmA_FMRFamide_R-like     | -  | cd28897 | Class_A |
| GSLYST00012228001 | specific     | 320109 | 1   | 302 | 1.17E-31    | 119.275 | cd14978   | 7tmA_FMRFamide_R-like     | -  | cd28897 | Class_A |
| GSLYST00012228001 | non-specific | 165021 | 4   | 265 | 0.00865977  | 37.3002 | PHAO2638  | PHAO2638                  | N  | cd27963 | Class_A |
| GSLYST00012248001 | non-specific | 320109 | 26  | 323 | 1.77E-26    | 105.793 | cd14978   | 7tmA_FMRFamide_R-like     | -  | cd28897 | Class_A |
| GSLYST00012248001 | non-specific | 313536 | 213 | 327 | 7.20E-07    | 49.9032 | pfam10324 | 7TM_GPCR_Srw              | N  | cd21561 | Class_A |
| GSLYST00012301001 | non-specific | 313536 | 129 | 416 | 9.01E-09    | 56.4516 | pfam10324 | 7TM_GPCR_Srw              | -  | cd21561 | Class_A |
| GSLYST00012301001 | specific     | 320109 | 122 | 410 | 9.61E-51    | 173.973 | cd14978   | 7tmA_FMRFamide_R-like     | -  | cd28897 | Class_A |
| GSLYST00012509001 | non-specific | 320109 | 5   | 278 | 1.76E-23    | 96.548  | cd14978   | 7tmA_FMRFamide_R-like     | -  | cd28897 | Class_A |
| GSLYST00012510001 | non-specific | 320109 | 15  | 283 | 6.61E-13    | 67.2728 | cd14978   | 7tmA_FMRFamide_R-like     | -  | cd28897 | Class_A |
| GSLYST00012511001 | non-specific | 320109 | 2   | 301 | 1.88E-21    | 91.5404 | cd14978   | 7tmA_FMRFamide_R-like     | -  | cd28897 | Class_A |
| GSLYST00012512001 | non-specific | 320109 | 11  | 290 | 8.21E-10    | 58.4132 | cd14978   | 7tmA_FMRFamide_R-like     | -  | cd28897 | Class_A |
| GSLYST00012512001 | non-specific | 313536 | 254 | 2   |             |         |           |                           |    |         |         |

|                   |              |        |     |      |             |         |           |                           |    |         |         |
|-------------------|--------------|--------|-----|------|-------------|---------|-----------|---------------------------|----|---------|---------|
| GSLYST00012818001 | non-specific | 320086 | 1   | 92   | 8.52E-13    | 61.1372 | cd00637   | 7tm_classA_rhodopsin-like | C  | cd18897 | Class_A |
| GSLYST00012822001 | superfamily  | 330316 | 510 | 600  | 0.00202923  | 41.4278 | cd25495   | Endomucin superfamily     | C  | -       | Class_A |
| GSLYST00012822001 | non-specific | 165513 | 510 | 600  | 0.00202923  | 41.4278 | PHA03255  | PHA03255                  | C  | cd25495 | Class_A |
| GSLYST00012822001 | non-specific | 226685 | 969 | 1077 | 0.00040736  | 44.6696 | COG4232   | DsbD                      | NC | cd26469 | Class_A |
| GSLYST00012842001 | specific     | 320086 | 1   | 110  | 2.21E-18    | 83.864  | cd00637   | 7tm_classA_rhodopsin-like | C  | cd18897 | Class_A |
| GSLYST00012853001 | non-specific | 320109 | 24  | 227  | 2.67E-08    | 52.6352 | cd14978   | 7tmA_FMRFamide_R-like     | C  | cd18897 | Class_A |
| GSLYST00012854001 | non-specific | 320109 | 1   | 293  | 1.13E-16    | 78.4436 | cd14978   | 7tmA_FMRFamide_R-like     | C  | cd18897 | Class_A |
| GSLYST00012855001 | non-specific | 320109 | 23  | 157  | 3.62E-10    | 58.028  | cd14978   | 7tmA_FMRFamide_R-like     | C  | cd18897 | Class_A |
| GSLYST00012855001 | non-specific | 313540 | 20  | 154  | 0.00305508  | 37.5537 | pfam10328 | 7TM_GPCR_Srx              | C  | cd21561 | Class_A |
| GSLYST00012855001 | non-specific | 320216 | 100 | 219  | 0.000396179 | 40.1282 | cd15088   | 7tmA_MCHR-like            | NC | cd18897 | Class_A |
| GSLYST00012980001 | specific     | 320191 | 51  | 271  | 3.14E-101   | 308.656 | cd15063   | 7tmA_Octopamine_R         | C  | cd18897 | Class_A |
| GSLYST00012980001 | non-specific | 222976 | 53  | 165  | 2.33E-12    | 68.2662 | PHA03087  | PHA03087                  | C  | cd27963 | Class_A |
| GSLYST00012980001 | non-specific | 320191 | 512 | 583  | 1.72E-40    | 148.413 | cd15063   | 7tmA_Octopamine_R         | N  | cd18897 | Class_A |
| GSLYST00012980001 | non-specific | 222976 | 508 | 587  | 7.29E-06    | 48.2358 | PHA03087  | PHA03087                  | N  | cd27963 | Class_A |
| GSLYST00012995001 | non-specific | 320262 | 2   | 249  | 4.79E-96    | 283.838 | cd15134   | 7tmA_capoR                | -  | cd28897 | Class_A |
| GSLYST00012995001 | non-specific | 222976 | 15  | 258  | 4.85E-07    | 49.7766 | PHA03087  | PHA03087                  | N  | cd27963 | Class_A |
| GSLYST00012998001 | non-specific | 320109 | 13  | 310  | 5.40E-16    | 76.5176 | cd14978   | 7tmA_FMRFamide_R-like     | -  | cd18897 | Class_A |
| GSLYST00013082001 | non-specific | 320109 | 1   | 336  | 1.34E-08    | 54.9464 | cd14978   | 7tmA_FMRFamide_R-like     | -  | cd18897 | Class_A |
| GSLYST00013147001 | non-specific | 320101 | 390 | 458  | 1.21E-05    | 46.5189 | cd14970   | 7tmA_Opioid_R-like        | N  | cd18897 | Class_A |
| GSLYST00013147001 | specific     | 320086 | 3   | 124  | 8.67E-15    | 74.234  | cd00637   | 7tm_classA_rhodopsin-like | NC | cd18897 | Class_A |
| GSLYST00013148001 | non-specific | 320109 | 40  | 365  | 2.08E-18    | 84.2216 | cd14978   | 7tmA_FMRFamide_R-like     | -  | cd18897 | Class_A |
| GSLYST00013149001 | non-specific | 320109 | 2   | 338  | 3.24E-08    | 53.7908 | cd14978   | 7tmA_FMRFamide_R-like     | -  | cd18897 | Class_A |
| GSLYST00013150001 | non-specific | 320109 | 2   | 336  | 1.26E-09    | 58.028  | cd14978   | 7tmA_FMRFamide_R-like     | -  | cd18897 | Class_A |
| GSLYST00013151001 | non-specific | 320109 | 1   | 320  | 5.54E-08    | 53.0204 | cd14978   | 7tmA_FMRFamide_R-like     | -  | cd18897 | Class_A |
| GSLYST00013152001 | non-specific | 320109 | 13  | 373  | 1.34E-10    | 61.4948 | cd14978   | 7tmA_FMRFamide_R-like     | -  | cd18897 | Class_A |
| GSLYST00013153001 | non-specific | 320109 | 1   | 328  | 9.84E-08    | 52.25   | cd14978   | 7tmA_FMRFamide_R-like     | -  | cd18897 | Class_A |
| GSLYST00013154001 | non-specific | 320086 | 5   | 209  | 1.08E-05    | 46.1144 | cd00637   | 7tm_classA_rhodopsin-like | C  | cd18897 | Class_A |
| GSLYST00013155001 | non-specific | 320086 | 5   | 209  | 3.17E-05    | 44.5736 | cd00637   | 7tm_classA_rhodopsin-like | C  | cd18897 | Class_A |
| GSLYST00013156001 | non-specific | 320086 | 5   | 209  | 7.84E-05    | 43.418  | cd00637   | 7tm_classA_rhodopsin-like | C  | cd18897 | Class_A |
| GSLYST00013157001 | non-specific | 320109 | 1   | 196  | 0.00732235  | 37.6125 | cd14978   | 7tmA_FMRFamide_R-like     | C  | cd18897 | Class_A |
| GSLYST00013158001 | non-specific | 320109 | 1   | 194  | 0.00712905  | 37.6125 | cd14978   | 7tmA_FMRFamide_R-like     | C  | cd18897 | Class_A |
| GSLYST00013159001 | non-specific | 320109 | 1   | 196  | 0.0047944   | 37.9977 | cd14978   | 7tmA_FMRFamide_R-like     | C  | cd18897 | Class_A |
| GSLYST00013160001 | non-specific | 320109 | 244 | 338  | 0.000595037 | 41.0793 | cd14978   | 7tmA_FMRFamide_R-like     | N  | cd18897 | Class_A |
| GSLYST00013161001 | non-specific | 320086 | 38  | 223  | 1.51E-07    | 51.8924 | cd00637   | 7tm_classA_rhodopsin-like | C  | cd18897 | Class_A |
| GSLYST00013162001 | non-specific | 320109 | 1   | 347  | 2.31E-06    | 48.398  | cd14978   | 7tmA_FMRFamide_R-like     | -  | cd18897 | Class_A |
| GSLYST00013163001 | non-specific | 320109 | 1   | 343  | 2.64E-06    | 48.0128 | cd14978   | 7tmA_FMRFamide_R-like     | -  | cd18897 | Class_A |
| GSLYST00013164001 | non-specific | 320109 | 1   | 343  | 5.77E-05    | 44.1608 | cd14978   | 7tmA_FMRFamide_R-like     | -  | cd18897 | Class_A |
| GSLYST00013167001 | non-specific | 320109 | 1   | 341  | 1.71E-06    | 48.7832 | cd14978   | 7tmA_FMRFamide_R-like     | -  | cd18897 | Class_A |
| GSLYST00013168001 | non-specific | 320109 | 1   | 341  | 1.15E-07    | 52.25   | cd14978   | 7tmA_FMRFamide_R-like     | -  | cd18897 | Class_A |
| GSLYST00013169001 | non-specific | 320109 | 1   | 343  | 3.43E-08    | 53.7908 | cd14978   | 7tmA_FMRFamide_R-like     | -  | cd18897 | Class_A |
| GSLYST00013170001 | non-specific | 320109 | 1   | 146  | 2.16E-06    | 48.398  | cd14978   | 7tmA_FMRFamide_R-like     | C  | cd18897 | Class_A |
| GSLYST00013171001 | non-specific | 320109 | 1   | 345  | 6.11E-09    | 56.102  | cd14978   | 7tmA_FMRFamide_R-like     | -  | cd18897 | Class_A |
| GSLYST00013172001 | non-specific | 320109 | 1   | 146  | 3.27E-06    | 48.0128 | cd14978   | 7tmA_FMRFamide_R-like     | C  | cd18897 | Class_A |
| GSLYST00013173001 | non-specific | 320109 | 1   | 340  | 1.31E-06    | 49.1684 | cd14978   | 7tmA_FMRFamide_R-like     | -  | cd18897 | Class_A |
| GSLYST00013174001 | non-specific | 320109 | 1   | 344  | 1.86E-06    | 48.7832 | cd14978   | 7tmA_FMRFamide_R-like     | -  | cd18897 | Class_A |
| GSLYST00013229001 | non-specific | 320109 | 2   | 309  | 1.31E-15    | 75.362  | cd14978   | 7tmA_FMRFamide_R-like     | -  | cd18897 | Class_A |
| GSLYST00013244001 | non-specific | 320109 | 55  | 365  | 7.18E-12    | 65.3468 | cd14978   | 7tmA_FMRFamide_R-like     | -  | cd18897 | Class_A |
| GSLYST00013245001 | non-specific | 320109 | 4   | 237  | 0.000346781 | 40.6941 | cd14978   | 7tmA_FMRFamide_R-like     | N  | cd18897 | Class_A |
| GSLYST00013260001 | non-specific | 320109 | 148 | 459  | 4.59E-22    | 95.7776 | cd14978   | 7tmA_FMRFamide_R-like     | -  | cd18897 | Class_A |
| GSLYST00013260001 | non-specific | 313536 | 148 | 463  | 0.00600514  | 38.3472 | pfam10324 | 7TM_GPCR_Srw              | -  | cd21561 | Class_A |
| GSLYST00013329001 | non-specific | 320109 | 2   | 288  | 3.92E-27    | 106.948 | cd14978   | 7tmA_FMRFamide_R-like     | -  | cd18897 | Class_A |
| GSLYST00013329001 | non-specific | 313540 | 2   | 237  | 0.000675631 | 40.2501 | pfam10328 | 7TM_GPCR_Srx              | -  | cd21561 | Class_A |
| GSLYST00013330001 | non-specific | 320109 | 1   | 295  | 6.17E-17    | 79.214  | cd14978   | 7tmA_FMRFamide_R-like     | -  | cd18897 | Class_A |
| GSLYST00013331001 | non-specific | 320109 | 1   | 294  | 5.86E-17    | 78.8288 | cd14978   | 7tmA_FMRFamide_R-like     | -  | cd18897 | Class_A |
| GSLYST00013332001 | non-specific | 320109 | 1   | 291  | 1.45E-17    | 80.7548 | cd14978   | 7tmA_FMRFamide_R-like     | -  | cd18897 | Class_A |
| GSLYST00013366001 | non-specific | 320109 | 18  | 130  | 2.65E-05    | 42.2348 | cd14978   | 7tmA_FMRFamide_R-like     | NC | cd18897 | Class_A |
| GSLYST00013367001 | non-specific | 320180 | 280 | 472  | 2.11E-102   | 318.488 | cd15052   | 7tmA_5-HT2                | C  | cd18897 | Class_A |
| GSLYST00013367001 | non-specific | 222976 | 277 | 466  | 2.61E-13    | 71.733  | PHA03087  | PHA03087                  | C  | cd27963 | Class_A |
| GSLYST00013367001 | non-specific | 320180 | 756 | 828  | 1.01E-36    | 138.985 | cd15052   | 7tmA_5-HT2                | N  | cd18897 | Class_A |
| GSLYST00013423001 | non-specific | 320109 | 2   | 305  | 2.20E-27    | 108.104 | cd14978   | 7tmA_FMRFamide_R-like     | -  | cd18897 | Class_A |
| GSLYST00013424001 | non-specific | 320109 | 2   | 299  | 1.79E-22    | 94.622  | cd14978   | 7tmA_FMRFamide_R-like     | -  | cd18897 | Class_A |
| GSLYST00013424001 | non-specific | 313536 | 12  | 290  | 4.58E-08    | 53.37   | pfam10324 | 7TM_GPCR_Srw              | -  | cd21561 | Class_A |
| GSLYST00013424001 | non-specific | 222976 | 12  | 137  | 0.000860263 | 40.1467 | PHA03087  | PHA03087                  | C  | cd27963 | Class_A |
| GSLYST00013425001 | non-specific | 320109 | 7   | 298  | 2.64E-22    | 93.8516 | cd14978   | 7tmA_FMRFamide_R-like     | -  | cd18897 | Class_A |
| GSLYST00013425001 | non-specific | 313536 | 4   | 293  | 1.07E-11    | 64.1556 | pfam10324 | 7TM_GPCR_Srw              | -  | cd21561 | Class_A |
| GSLYST00013426001 | non-specific | 320109 | 46  | 341  | 7.63E-20    | 88.0736 | cd14978   | 7tmA_FMRFamide_R-like     | -  | cd18897 | Class_A |
| GSLYST00013426001 | non-specific | 313536 | 54  | 211  | 3.77E-07    | 50.6736 | pfam10324 | 7TM_GPCR_Srw              | C  | cd21561 | Class_A |
| GSLYST00013427001 | non-specific | 320109 | 2   | 302  | 1.61E-28    | 111.186 | cd14978   | 7tmA_FMRFamide_R-like     | -  | cd18897 | Class_A |
| GSLYST00013427001 | non-specific | 313536 | 12  | 308  | 9.64E-11    | 61.4592 | pfam10324 | 7TM_GPCR_Srw              | -  | cd21561 | Class_A |
| GSLYST00013430001 | non-specific | 320109 | 35  | 327  | 4.95E-23    | 96.9332 | cd14978   | 7tmA_FMRFamide_R-like     | -  | cd18897 | Class_A |
| GSLYST00013532001 | specific     | 320109 | 82  | 393  | 2.09E-65    | 211.337 | cd14978   | 7tmA_FMRFamide_R-like     | -  | cd18897 | Class_A |
| GSLYST00013532001 | non-specific | 313536 | 86  | 397  | 2.35E-17    | 82.26   | pfam10324 | 7TM_GPCR_Srw              | -  | cd21561 | Class_A |
| GSLYST00013565001 | non-specific | 320325 | 37  | 343  | 2.38E-121   | 352.497 | cd15197   | 7tmA_NPSR                 | -  | cd18897 | Class_A |
| GSLYST00013565001 | non-specific | 222976 | 18  | 333  | 2.30E-16    | 79.0518 | PHA03087  | PHA03087                  | -  | cd27963 | Class_A |
| GSLYST00013609001 | non-specific | 320109 | 109 | 385  | 2.11E-16    | 78.8288 | cd14978   | 7tmA_FMRFamide_R-like     | -  | cd18897 | Class_A |
| GSLYST00013628001 | non-specific | 320109 | 17  | 339  | 5.77E-12    | 65.3468 | cd14978   | 7tmA_FMRFamide_R-like     | -  | cd18897 | Class_A |
| GSLYST00013629001 | non-specific | 320109 | 15  | 348  | 3.83E-11    | 63.0356 | cd14978   | 7tmA_FMRFamide_R-like     | -  | cd18897 | Class_A |
| GSLYST00013635001 | non-specific | 320109 | 1   | 330  | 1.05E-12    | 67.2728 | cd14978   | 7tmA_FMRFamide_R-like     | -  | cd18897 | Class_A |
| GSLYST00013731001 | non-specific | 320109 | 4   | 64   | 2.11E-05    | 39.5385 | cd14978   | 7tmA_FMRFamide_R-like     | C  | cd18897 | Class_A |
| GSLYST00013732001 | non-specific | 320109 | 116 | 214  | 9.60E-14    | 68.0432 | cd14978   | 7tmA_FMRFamide_R-like     | C  | cd18897 | Class_A |
| GSLYST00013737001 | non-specific | 320126 | 27  | 335  | 3.86E-118   | 345.139 | cd14995   | 7tmA_TRH-R                | -  | cd18897 | Class_A |
| GSLYST00013737001 | non-specific | 222976 | 29  | 340  | 1.17E-20    | 92.1486 | PHA03087  | PHA03087                  | -  | cd27963 | Class_A |
| GSLYST00013809001 | non-specific | 320336 | 83  | 403  | 3.53E-135   | 390.597 | cd15208   | 7tmA_OXR                  | -  | cd18897 | Class_A |
| GSLYST00013809001 | non-specific | 222976 | 59  | 405  | 4.33E-14    | 72.8886 | PHA03087  | PHA03087                  | -  | cd27963 | Class_A |
| GSLYST00013839001 | specific     | 320109 | 42  | 340  | 1.23E-35    | 131.601 | cd14978   | 7tmA_FMRFamide_R-like     | -  | cd18897 | Class_A |
| GSLYST00014035001 | non-specific | 320109 | 23  | 316  | 1.43E-19    | 86.918  | cd14978   | 7tmA_FMRFamide_R-like     | -  | cd18897 | Class_A |
| GSLYST00014045001 | non-specific | 320109 | 1   | 126  | 1.44E-05    | 44.1608 | cd14978   | 7tmA_FMRFamide_R-like     | C  | cd18897 | Class_A |
| GSLYST00014051001 | non-specific | 320109 | 3   | 305  | 4.95E-28    | 109.645 | cd14978   | 7tmA_FMRFamide_R-like     | -  | cd18897 | Class_A |
| GSLYST00014054001 | specific     | 320086 | 1   | 291  | 5.37E-34    | 124.31  | cd00637   | 7tm_classA_rhodopsin-like | -  | cd18897 | Class_A |
| GSLYST00014054001 | non-specific | 222976 | 2   | 134  | 0.0037989   | 38.2207 | PHA03087  | PHA03087                  | C  | cd27963 | Class_A |
| GSLYST00014055001 | non-specific | 320098 | 6   | 301  | 4.42E-39    | 137.694 | cd14967   | 7tmA_amine_R-like         | -  | cd18897 | Class_A |
| GSLYST00014055001 | non-specific | 222976 | 15  | 295  | 3.71E-07    | 50.547  | PHA03087  | PHA03087                  | -  | cd27963 | Class_A |
| GSLYST00014126001 | non-specific | 320109 | 34  | 327  | 3.55E-26    | 105.793 | cd14978   | 7tmA_FMRFamide_R-like     | -  | cd18897 | Class_A |
| GSLYST00014137001 | specific     | 320086 | 65  | 343  | 4.94E-19    | 85.79   | cd00637   | 7tm_classA_rhodopsin-like | -  | cd18897 | Class_A |
| GSLYST00014155001 | non-specific | 320211 | 2   | 169  | 1.44E-50    | 163.658 | cd15083   | 7tmA_Melanopsin-like      | N  | cd18897 | Class_A |
| GSLYST00014207001 | specific     | 320086 | 34  | 180  | 2.12E-27    | 111.598 | cd00637   | 7tm_classA_rhodopsin-like | C  | cd18897 | Class_A |

|                   |              |        |     |     |             |         |           |                           |    |         |         |
|-------------------|--------------|--------|-----|-----|-------------|---------|-----------|---------------------------|----|---------|---------|
| GSLYST00014777001 | non-specific | 320109 | 9   | 300 | 7.63E-16    | 76.1324 | cd14978   | 7tmA_FMRFamide_R-like     | -  | cd28897 | Class_A |
| GSLYST00014796001 | non-specific | 320109 | 52  | 351 | 2.51E-29    | 114.652 | cd14978   | 7tmA_FMRFamide_R-like     | -  | cd28897 | Class_A |
| GSLYST00014823001 | non-specific | 320109 | 9   | 284 | 1.40E-16    | 78.0584 | cd14978   | 7tmA_FMRFamide_R-like     | -  | cd28897 | Class_A |
| GSLYST00014912001 | non-specific | 320109 | 12  | 305 | 7.03E-29    | 111.956 | cd14978   | 7tmA_FMRFamide_R-like     | -  | cd28897 | Class_A |
| GSLYST00014912001 | non-specific | 222976 | 17  | 296 | 0.000682412 | 40.5319 | PHA03087  | PHA03087                  | -  | cd27963 | Class_A |
| GSLYST00014916001 | specific     | 320109 | 70  | 358 | 2.87E-31    | 119.66  | cd14978   | 7tmA_FMRFamide_R-like     | -  | cd28897 | Class_A |
| GSLYST00014916001 | non-specific | 313536 | 144 | 362 | 2.77E-07    | 51.444  | pfam10324 | 7TM_GPCR_Srw              | N  | cd21561 | Class_A |
| GSLYST00014920001 | non-specific | 320109 | 5   | 301 | 4.56E-20    | 88.0736 | cd14978   | 7tmA_FMRFamide_R-like     | -  | cd28897 | Class_A |
| GSLYST00014920001 | non-specific | 313536 | 86  | 308 | 8.21E-07    | 49.518  | pfam10324 | 7TM_GPCR_Srw              | N  | cd21561 | Class_A |
| GSLYST00014922001 | specific     | 320109 | 21  | 338 | 6.52E-69    | 218.656 | cd14978   | 7tmA_FMRFamide_R-like     | -  | cd28897 | Class_A |
| GSLYST00014922001 | non-specific | 313536 | 24  | 345 | 2.08E-32    | 123.476 | pfam10324 | 7TM_GPCR_Srw              | -  | cd21561 | Class_A |
| GSLYST00014922001 | non-specific | 222976 | 33  | 163 | 0.00784854  | 37.8355 | PHA03087  | PHA03087                  | C  | cd27963 | Class_A |
| GSLYST00014960001 | non-specific | 320086 | 16  | 264 | 7.70E-08    | 52.2776 | cd00637   | 7tm_classA_rhodopsin-like | -  | cd28897 | Class_A |
| GSLYST00014961001 | specific     | 320086 | 2   | 253 | 2.11E-15    | 73.8488 | cd00637   | 7tm_classA_rhodopsin-like | -  | cd28897 | Class_A |
| GSLYST00014962001 | specific     | 320086 | 99  | 321 | 2.56E-16    | 77.7008 | cd00637   | 7tm_classA_rhodopsin-like | N  | cd28897 | Class_A |
| GSLYST00014963001 | non-specific | 320109 | 22  | 308 | 9.11E-29    | 111.956 | cd14978   | 7tmA_FMRFamide_R-like     | -  | cd28897 | Class_A |
| GSLYST00014963001 | non-specific | 222976 | 2   | 318 | 5.66E-05    | 43.9986 | PHA03087  | PHA03087                  | -  | cd27963 | Class_A |
| GSLYST00014964001 | non-specific | 320109 | 15  | 310 | 7.93E-20    | 87.3032 | cd14978   | 7tmA_FMRFamide_R-like     | -  | cd28897 | Class_A |
| GSLYST00015021001 | non-specific | 320109 | 1   | 289 | 2.21E-19    | 85.7624 | cd14978   | 7tmA_FMRFamide_R-like     | -  | cd28897 | Class_A |
| GSLYST00015021001 | non-specific | 313536 | 1   | 289 | 0.000894857 | 39.888  | pfam10324 | 7TM_GPCR_Srw              | -  | cd21561 | Class_A |
| GSLYST00015022001 | non-specific | 320109 | 1   | 289 | 3.71E-16    | 76.5176 | cd14978   | 7tmA_FMRFamide_R-like     | -  | cd28897 | Class_A |
| GSLYST00015049001 | non-specific | 320109 | 35  | 340 | 1.04E-21    | 93.0812 | cd14978   | 7tmA_FMRFamide_R-like     | -  | cd28897 | Class_A |
| GSLYST00015068001 | non-specific | 320109 | 14  | 359 | 2.34E-06    | 48.398  | cd14978   | 7tmA_FMRFamide_R-like     | -  | cd28897 | Class_A |
| GSLYST00015069001 | non-specific | 320109 | 28  | 369 | 2.43E-08    | 54.5612 | cd14978   | 7tmA_FMRFamide_R-like     | -  | cd28897 | Class_A |
| GSLYST00015124001 | non-specific | 320109 | 10  | 327 | 2.61E-12    | 66.1172 | cd14978   | 7tmA_FMRFamide_R-like     | -  | cd28897 | Class_A |
| GSLYST00015125001 | non-specific | 320109 | 2   | 297 | 8.38E-16    | 75.7472 | cd14978   | 7tmA_FMRFamide_R-like     | -  | cd28897 | Class_A |
| GSLYST00015126001 | non-specific | 320086 | 5   | 97  | 0.00203951  | 38.4104 | cd00637   | 7tm_classA_rhodopsin-like | C  | cd28897 | Class_A |
| GSLYST00015127001 | non-specific | 320109 | 1   | 208 | 4.27E-07    | 48.7832 | cd14978   | 7tmA_FMRFamide_R-like     | C  | cd28897 | Class_A |
| GSLYST00015128001 | non-specific | 320109 | 1   | 310 | 3.04E-15    | 74.5916 | cd14978   | 7tmA_FMRFamide_R-like     | -  | cd28897 | Class_A |
| GSLYST00015129001 | non-specific | 320109 | 45  | 316 | 2.59E-06    | 48.0128 | cd14978   | 7tmA_FMRFamide_R-like     | -  | cd28897 | Class_A |
| GSLYST00015131001 | non-specific | 320109 | 1   | 320 | 3.11E-15    | 74.5916 | cd14978   | 7tmA_FMRFamide_R-like     | -  | cd28897 | Class_A |
| GSLYST00015132001 | non-specific | 320109 | 1   | 320 | 6.26E-15    | 73.8212 | cd14978   | 7tmA_FMRFamide_R-like     | -  | cd28897 | Class_A |
| GSLYST00015133001 | non-specific | 320109 | 1   | 315 | 3.55E-14    | 71.51   | cd14978   | 7tmA_FMRFamide_R-like     | -  | cd28897 | Class_A |
| GSLYST00015168001 | non-specific | 320109 | 1   | 211 | 2.45E-12    | 64.1912 | cd14978   | 7tmA_FMRFamide_R-like     | C  | cd28897 | Class_A |
| GSLYST00015190001 | specific     | 320514 | 98  | 381 | 3.91E-158   | 449.118 | cd15392   | 7tmA_PR4-like             | -  | cd28897 | Class_A |
| GSLYST00015190001 | non-specific | 222976 | 97  | 383 | 5.42E-22    | 96.3858 | PHA03087  | PHA03087                  | -  | cd27963 | Class_A |
| GSLYST00015213001 | non-specific | 320109 | 5   | 92  | 2.66E-06    | 43.3904 | cd14978   | 7tmA_FMRFamide_R-like     | N  | cd28897 | Class_A |
| GSLYST00015319001 | non-specific | 320109 | 5   | 284 | 3.85E-21    | 90.3848 | cd14978   | 7tmA_FMRFamide_R-like     | -  | cd28897 | Class_A |
| GSLYST00015320001 | non-specific | 320109 | 2   | 301 | 1.03E-20    | 89.6144 | cd14978   | 7tmA_FMRFamide_R-like     | -  | cd28897 | Class_A |
| GSLYST00015331001 | non-specific | 320098 | 7   | 305 | 8.18E-38    | 134.613 | cd14967   | 7tmA_amine_R-like         | -  | cd28897 | Class_A |
| GSLYST00015331001 | non-specific | 222976 | 8   | 218 | 7.22E-05    | 43.6134 | PHA03087  | PHA03087                  | C  | cd27963 | Class_A |
| GSLYST00015332001 | non-specific | 320098 | 1   | 254 | 5.60E-31    | 115.738 | cd14967   | 7tmA_amine_R-like         | -  | cd28897 | Class_A |
| GSLYST00015332001 | non-specific | 222976 | 40  | 251 | 0.000625136 | 40.5319 | PHA03087  | PHA03087                  | N  | cd27963 | Class_A |
| GSLYST00015333001 | non-specific | 320098 | 9   | 296 | 3.14E-42    | 146.169 | cd14967   | 7tmA_amine_R-like         | -  | cd28897 | Class_A |
| GSLYST00015333001 | non-specific | 222976 | 86  | 249 | 2.69E-06    | 47.8506 | PHA03087  | PHA03087                  | NC | cd27963 | Class_A |
| GSLYST00015334001 | non-specific | 320098 | 1   | 292 | 5.10E-39    | 137.309 | cd14967   | 7tmA_amine_R-like         | -  | cd28897 | Class_A |
| GSLYST00015334001 | non-specific | 165021 | 7   | 284 | 0.000975637 | 40.3818 | PHA02638  | PHA02638                  | N  | cd27963 | Class_A |
| GSLYST00015335001 | non-specific | 320098 | 1   | 287 | 2.30E-33    | 122.672 | cd14967   | 7tmA_amine_R-like         | -  | cd28897 | Class_A |
| GSLYST00015336001 | specific     | 320086 | 1   | 296 | 4.52E-36    | 130.088 | cd00637   | 7tm_classA_rhodopsin-like | -  | cd28897 | Class_A |
| GSLYST00015337001 | specific     | 320086 | 1   | 296 | 6.96E-35    | 127.006 | cd00637   | 7tm_classA_rhodopsin-like | -  | cd28897 | Class_A |
| GSLYST00015338001 | specific     | 320086 | 2   | 332 | 6.51E-36    | 130.858 | cd00637   | 7tm_classA_rhodopsin-like | -  | cd28897 | Class_A |
| GSLYST00015339001 | non-specific | 320098 | 1   | 296 | 3.31E-34    | 124.598 | cd14967   | 7tmA_amine_R-like         | -  | cd28897 | Class_A |
| GSLYST00015360001 | non-specific | 320098 | 1   | 265 | 7.15E-41    | 141.932 | cd14967   | 7tmA_amine_R-like         | -  | cd28897 | Class_A |
| GSLYST00015361001 | non-specific | 320098 | 7   | 281 | 1.99E-39    | 138.08  | cd14967   | 7tmA_amine_R-like         | -  | cd28897 | Class_A |
| GSLYST00015479001 | non-specific | 278431 | 47  | 292 | 1.66E-08    | 54.6208 | pfam00001 | 7tm_1                     | -  | cd27963 | Class_A |
| GSLYST00015537001 | non-specific | 320334 | 2   | 84  | 8.52E-36    | 121.343 | cd15206   | 7tmA_CCK_R                | C  | cd28897 | Class_A |
| GSLYST00015537001 | non-specific | 222976 | 5   | 80  | 3.03E-08    | 48.621  | PHA03087  | PHA03087                  | C  | cd27963 | Class_A |
| GSLYST00015538001 | non-specific | 320334 | 2   | 282 | 6.20E-69    | 217.643 | cd15206   | 7tmA_CCK_R                | N  | cd28897 | Class_A |
| GSLYST00015538001 | non-specific | 222976 | 204 | 278 | 0.00104077  | 40.5319 | PHA03087  | PHA03087                  | N  | cd27963 | Class_A |
| GSLYST00015603001 | specific     | 320124 | 1   | 270 | 2.87E-80    | 243.661 | cd14993   | 7tmA_CCKR-like            | -  | cd28897 | Class_A |
| GSLYST00015603001 | non-specific | 222976 | 2   | 238 | 8.44E-15    | 72.8886 | PHA03087  | PHA03087                  | C  | cd27963 | Class_A |
| GSLYST00015744001 | non-specific | 320109 | 90  | 402 | 4.68E-09    | 56.8724 | cd14978   | 7tmA_FMRFamide_R-like     | -  | cd28897 | Class_A |
| GSLYST00015745001 | non-specific | 320109 | 1   | 284 | 9.04E-26    | 103.096 | cd14978   | 7tmA_FMRFamide_R-like     | -  | cd28897 | Class_A |
| GSLYST00015745001 | non-specific | 165021 | 1   | 227 | 0.00818097  | 37.3002 | PHA02638  | PHA02638                  | NC | cd27963 | Class_A |
| GSLYST00015782001 | non-specific | 320110 | 12  | 113 | 8.90E-12    | 65.4542 | cd14979   | 7tmA_NTSR-like            | NC | cd28897 | Class_A |
| GSLYST00015783001 | non-specific | 320128 | 69  | 167 | 4.95E-08    | 50.7515 | cd14997   | 7tmA_ETH-R                | N  | cd28897 | Class_A |
| GSLYST00015784001 | specific     | 320086 | 38  | 152 | 1.80E-15    | 72.6932 | cd00637   | 7tm_classA_rhodopsin-like | C  | cd28897 | Class_A |
| GSLYST00015785001 | non-specific | 320131 | 1   | 68  | 1.35E-06    | 43.568  | cd15000   | 7tmA_BNGR-A34-like        | N  | cd28897 | Class_A |
| GSLYST00015787001 | non-specific | 320638 | 1   | 68  | 0.00268481  | 34.3927 | cd15972   | 7tmA_SSTR3                | N  | cd28897 | Class_A |
| GSLYST00015788001 | non-specific | 320331 | 11  | 148 | 5.67E-12    | 61.4663 | cd15203   | 7tmA_NPYR-like            | C  | cd28897 | Class_A |
| GSLYST00015789001 | non-specific | 320335 | 50  | 70  | 0.000566556 | 36.0601 | cd15207   | 7tmA_NPFFR                | N  | cd28897 | Class_A |
| GSLYST00015791001 | specific     | 320086 | 23  | 160 | 1.40E-17    | 76.9304 | cd00637   | 7tm_classA_rhodopsin-like | C  | cd28897 | Class_A |
| GSLYST00015791001 | non-specific | 165021 | 23  | 148 | 0.00127753  | 38.0706 | PHA02638  | PHA02638                  | NC | cd27963 | Class_A |
| GSLYST00015884001 | non-specific | 320593 | 82  | 376 | 3.76E-133   | 383.926 | cd15927   | 7tmA_Bombesin_R-like      | -  | cd28897 | Class_A |
| GSLYST00015884001 | non-specific | 222976 | 81  | 391 | 1.33E-17    | 83.289  | PHA03087  | PHA03087                  | -  | cd27963 | Class_A |
| GSLYST00016128001 | specific     | 320086 | 1   | 134 | 9.80E-23    | 96.9608 | cd00637   | 7tm_classA_rhodopsin-like | C  | cd28897 | Class_A |
| GSLYST00016128001 | non-specific | 320133 | 360 | 419 | 3.09E-05    | 45.0938 | cd15002   | 7tmA_GPR151               | N  | cd28897 | Class_A |
| GSLYST00016169001 | non-specific | 320514 | 96  | 392 | 2.40E-116   | 344.344 | cd15392   | 7tmA_PR4-like             | -  | cd28897 | Class_A |
| GSLYST00016169001 | non-specific | 165021 | 16  | 399 | 1.18E-18    | 87.7614 | PHA02638  | PHA02638                  | -  | cd27963 | Class_A |
| GSLYST00016218001 | specific     | 320086 | 25  | 238 | 5.69E-16    | 76.5452 | cd00637   | 7tm_classA_rhodopsin-like | N  | cd28897 | Class_A |
| GSLYST00016378001 | non-specific | 320134 | 237 | 554 | 4.03E-105   | 319.403 | cd15005   | 7tmA_SREB-like            | -  | cd28897 | Class_A |
| GSLYST00016378001 | non-specific | 165177 | 228 | 434 | 1.11E-07    | 53.7548 | PHA02834  | PHA02834                  | C  | cd27963 | Class_A |
| GSLYST00016446001 | non-specific | 320086 | 21  | 96  | 8.78E-08    | 47.6552 | cd00637   | 7tm_classA_rhodopsin-like | C  | cd28897 | Class_A |
| GSLYST00016447001 | non-specific | 320086 | 328 | 411 | 4.70E-08    | 53.8184 | cd00637   | 7tm_classA_rhodopsin-like | N  | cd28897 | Class_A |
| GSLYST00016447001 | specific     | 320086 | 1   | 125 | 2.48E-12    | 66.53   | cd00637   | 7tm_classA_rhodopsin-like | NC | cd28897 | Class_A |
| GSLYST00016448001 | specific     | 320086 | 60  | 262 | 2.10E-30    | 119.302 | cd00637   | 7tm_classA_rhodopsin-like | C  | cd28897 | Class_A |
| GSLYST00016448001 | non-specific | 222976 | 61  | 175 | 0.000291153 | 42.843  | PHA03087  | PHA03087                  | C  | cd27963 | Class_A |
| GSLYST00016448001 | non-specific | 320101 | 427 | 511 | 0.00310927  | 39.5853 | cd14970   | 7tmA_Opioid_R-like        | N  | cd28897 | Class_A |
| GSLYST00016567001 | specific     | 320109 | 3   | 156 | 2.45E-31    | 120.816 | cd14978   | 7tmA_FMRFamide_R-like     | N  | cd28897 | Class_A |
| GSLYST00016646001 | specific     | 320109 | 2   | 278 | 2.94E-37    | 134.298 | cd14978   | 7tmA_FMRFamide_R-like     | -  | cd28897 | Class_A |
| GSLYST00016675001 | non-specific | 320109 | 1   | 311 | 1.48E-16    | 78.4436 | cd14978   | 7tmA_FMRFamide_R-like     | -  | cd28897 | Class_A |
| GSLYST00016690001 | non-specific | 320124 | 9   | 83  | 7.69E-21    | 82.6472 | cd14993   | 7tmA_CCKR-like            | C  | cd28897 | Class_A |
| GSLYST00016690001 | non-specific | 165021 | 10  | 79  | 1.33E-06    | 43.8486 | PHA02638  | PHA02638                  | NC | cd27963 | Class_A |
| GSLYST00016691001 | non-specific | 320109 | 20  | 310 | 8.93E-23    | 95.7776 | cd14978   | 7tmA_FMRFamide_R-like     | -  | cd28897 | Class_A |
| GSLYST00016691001 | non-specific | 313536 | 22  | 317 | 3.16E-12    | 66.0816 | pfam10324 | 7TM_GPCR_Srw              | -  | cd21561 | Class_A |
| GSLYST00016692001 | non-specific | 320109 | 1   | 272 | 6.76E-17    | 78.8288 | cd14978   | 7tmA_FMRFamide_R-like     | -  | cd28897 | Class_A |
| GSLYST00016718001 | non-specific | 32     |     |     |             |         |           |                           |    |         |         |

|                   |              |        |     |     |             |         |           |                             |    |          |         |
|-------------------|--------------|--------|-----|-----|-------------|---------|-----------|-----------------------------|----|----------|---------|
| GSLYST00016915001 | non-specific | 320109 | 22  | 319 | 7.69E-24    | 98.8592 | cd14978   | 7tmA_FMRFamide_R-like       | -  | cd128897 | Class_A |
| GSLYST00016916001 | non-specific | 320109 | 40  | 339 | 1.23E-21    | 93.8516 | cd14978   | 7tmA_FMRFamide_R-like       | -  | cd128897 | Class_A |
| GSLYST00016916001 | non-specific | 313536 | 68  | 346 | 4.21E-09    | 57.222  | pfam10324 | 7TM_GPCR_Srw                | -  | cd121561 | Class_A |
| GSLYST00017157001 | non-specific | 320109 | 1   | 359 | 5.95E-07    | 50.324  | cd14978   | 7tmA_FMRFamide_R-like       | -  | cd128897 | Class_A |
| GSLYST00017179001 | non-specific | 320109 | 59  | 347 | 1.82E-17    | 81.5252 | cd14978   | 7tmA_FMRFamide_R-like       | -  | cd128897 | Class_A |
| GSLYST00017179001 | non-specific | 313536 | 59  | 351 | 0.000646882 | 41.0436 | pfam10324 | 7TM_GPCR_Srw                | -  | cd121561 | Class_A |
| GSLYST00017180001 | non-specific | 320109 | 11  | 211 | 4.08E-07    | 49.1684 | cd14978   | 7tmA_FMRFamide_R-like       | -  | cd128897 | Class_A |
| GSLYST00017240001 | non-specific | 320109 | 45  | 333 | 7.55E-26    | 104.637 | cd14978   | 7tmA_FMRFamide_R-like       | -  | cd128897 | Class_A |
| GSLYST00017240001 | non-specific | 313536 | 45  | 338 | 4.06E-10    | 59.9184 | pfam10324 | 7TM_GPCR_Srw                | -  | cd121561 | Class_A |
| GSLYST00017249001 | specific     | 320086 | 46  | 250 | 4.38E-28    | 114.295 | cd00637   | 7tm_classA_rhodopsin-like   | C  | cd128897 | Class_A |
| GSLYST00017249001 | non-specific | 165021 | 4   | 176 | 2.50E-06    | 50.397  | PHAO2638  | PHAO2638                    | C  | cd127963 | Class_A |
| GSLYST00017249001 | non-specific | 320086 | 673 | 767 | 6.57E-09    | 57.6704 | cd00637   | 7tm_classA_rhodopsin-like   | N  | cd128897 | Class_A |
| GSLYST00017250001 | specific     | 320086 | 129 | 330 | 3.32E-19    | 88.4864 | cd00637   | 7tm_classA_rhodopsin-like   | C  | cd128897 | Class_A |
| GSLYST00017250001 | non-specific | 165021 | 6   | 280 | 7.51E-09    | 58.8714 | PHAO2638  | PHAO2638                    | C  | cd127963 | Class_A |
| GSLYST00017250001 | non-specific | 320086 | 910 | 993 | 3.44E-09    | 58.826  | cd00637   | 7tm_classA_rhodopsin-like   | N  | cd128897 | Class_A |
| GSLYST00017251001 | non-specific | 320086 | 5   | 75  | 0.000230256 | 37.2548 | cd00637   | 7tm_classA_rhodopsin-like   | C  | cd128897 | Class_A |
| GSLYST00017252001 | non-specific | 320086 | 7   | 83  | 2.41E-06    | 43.8032 | cd00637   | 7tm_classA_rhodopsin-like   | N  | cd128897 | Class_A |
| GSLYST00017253001 | non-specific | 320109 | 2   | 81  | 0.0038313   | 34.1457 | cd14978   | 7tmA_FMRFamide_R-like       | N  | cd128897 | Class_A |
| GSLYST00017254001 | non-specific | 320086 | 4   | 99  | 1.16E-08    | 49.9664 | cd00637   | 7tm_classA_rhodopsin-like   | C  | cd128897 | Class_A |
| GSLYST00017255001 | non-specific | 320124 | 205 | 277 | 1.93E-05    | 44.8976 | cd14993   | 7tmA_CCKR-like              | N  | cd128897 | Class_A |
| GSLYST00017256001 | non-specific | 320086 | 5   | 101 | 2.45E-09    | 52.2776 | cd00637   | 7tm_classA_rhodopsin-like   | C  | cd128897 | Class_A |
| GSLYST00017257001 | non-specific | 320124 | 10  | 82  | 2.12E-06    | 43.3568 | cd14993   | 7tmA_CCKR-like              | N  | cd128897 | Class_A |
| GSLYST00017258001 | non-specific | 320086 | 31  | 106 | 3.32E-10    | 54.5888 | cd00637   | 7tm_classA_rhodopsin-like   | C  | cd128897 | Class_A |
| GSLYST00017258001 | non-specific | 165021 | 27  | 93  | 0.00778886  | 34.2186 | PHAO2638  | PHAO2638                    | NC | cd127963 | Class_A |
| GSLYST00017259001 | non-specific | 320428 | 2   | 80  | 4.73E-08    | 47.8952 | cd15301   | 7tmA_mAChR_DM1-like         | N  | cd128897 | Class_A |
| GSLYST00017260001 | specific     | 320086 | 5   | 139 | 1.21E-14    | 69.2264 | cd00637   | 7tm_classA_rhodopsin-like   | C  | cd128897 | Class_A |
| GSLYST00017261001 | non-specific | 320124 | 4   | 76  | 1.27E-06    | 43.742  | cd14993   | 7tmA_CCKR-like              | N  | cd128897 | Class_A |
| GSLYST00017262001 | non-specific | 320110 | 11  | 117 | 3.05E-05    | 41.1866 | cd14979   | 7tmA_NTSR-like              | C  | cd128897 | Class_A |
| GSLYST00017283001 | non-specific | 320109 | 25  | 321 | 9.89E-27    | 106.563 | cd14978   | 7tmA_FMRFamide_R-like       | -  | cd128897 | Class_A |
| GSLYST00017283001 | non-specific | 313536 | 28  | 328 | 5.63E-11    | 62.2296 | pfam10324 | 7TM_GPCR_Srw                | -  | cd121561 | Class_A |
| GSLYST00017295001 | specific     | 320086 | 7   | 131 | 1.29E-16    | 73.0784 | cd00637   | 7tm_classA_rhodopsin-like   | NC | cd128897 | Class_A |
| GSLYST00017296001 | non-specific | 320086 | 4   | 118 | 3.05E-11    | 58.0556 | cd00637   | 7tm_classA_rhodopsin-like   | C  | cd128897 | Class_A |
| GSLYST00017329001 | non-specific | 320109 | 17  | 312 | 8.40E-28    | 109.26  | cd14978   | 7tmA_FMRFamide_R-like       | -  | cd128897 | Class_A |
| GSLYST00017330001 | non-specific | 320109 | 15  | 313 | 1.18E-27    | 108.874 | cd14978   | 7tmA_FMRFamide_R-like       | -  | cd128897 | Class_A |
| GSLYST00017330001 | non-specific | 313536 | 23  | 320 | 4.09E-06    | 47.592  | pfam10324 | 7TM_GPCR_Srw                | -  | cd121561 | Class_A |
| GSLYST00017331001 | non-specific | 320109 | 16  | 312 | 6.61E-27    | 106.948 | cd14978   | 7tmA_FMRFamide_R-like       | -  | cd128897 | Class_A |
| GSLYST00017331001 | non-specific | 313536 | 46  | 316 | 1.11E-06    | 49.1328 | pfam10324 | 7TM_GPCR_Srw                | -  | cd121561 | Class_A |
| GSLYST00017391001 | non-specific | 320109 | 9   | 265 | 2.32E-19    | 85.3772 | cd14978   | 7tmA_FMRFamide_R-like       | N  | cd128897 | Class_A |
| GSLYST00017392001 | non-specific | 320109 | 1   | 48  | 2.59E-09    | 50.324  | cd14978   | 7tmA_FMRFamide_R-like       | C  | cd128897 | Class_A |
| GSLYST00017531001 | specific     | 320452 | 71  | 410 | 4.56E-148   | 422.835 | cd15329   | 7tmA_5-HT7                  | -  | cd128897 | Class_A |
| GSLYST00017531001 | non-specific | 222976 | 85  | 417 | 7.12E-10    | 60.177  | PHAO3087  | PHAO3087                    | -  | cd127963 | Class_A |
| GSLYST00017736001 | non-specific | 320098 | 1   | 315 | 1.99E-36    | 131.531 | cd14967   | 7tmA_amine_R-like           | -  | cd128897 | Class_A |
| GSLYST00017737001 | specific     | 320086 | 1   | 253 | 6.17E-25    | 99.272  | cd00637   | 7tm_classA_rhodopsin-like   | -  | cd128897 | Class_A |
| GSLYST00017737001 | non-specific | 165021 | 1   | 225 | 0.000461506 | 40.767  | PHAO2638  | PHAO2638                    | N  | cd127963 | Class_A |
| GSLYST00017738001 | specific     | 320086 | 1   | 282 | 1.24E-31    | 118.147 | cd00637   | 7tm_classA_rhodopsin-like   | -  | cd128897 | Class_A |
| GSLYST00017738001 | non-specific | 222976 | 2   | 244 | 4.85E-06    | 47.0802 | PHAO3087  | PHAO3087                    | C  | cd127963 | Class_A |
| GSLYST00017739001 | non-specific | 320098 | 10  | 364 | 2.75E-32    | 121.516 | cd14967   | 7tmA_amine_R-like           | -  | cd128897 | Class_A |
| GSLYST00017739001 | non-specific | 222976 | 2   | 180 | 0.00139966  | 40.1467 | PHAO3087  | PHAO3087                    | C  | cd127963 | Class_A |
| GSLYST00017739001 | non-specific | 320109 | 3   | 298 | 3.94E-23    | 96.9332 | cd14978   | 7tmA_FMRFamide_R-like       | -  | cd128897 | Class_A |
| GSLYST00017803001 | non-specific | 313536 | 3   | 302 | 1.32E-05    | 46.0512 | pfam10324 | 7TM_GPCR_Srw                | -  | cd121561 | Class_A |
| GSLYST00017809001 | non-specific | 320109 | 21  | 275 | 1.24E-19    | 86.918  | cd14978   | 7tmA_FMRFamide_R-like       | -  | cd128897 | Class_A |
| GSLYST00017809001 | non-specific | 313540 | 28  | 243 | 0.00393963  | 37.9389 | pfam10328 | 7TM_GPCR_Srx                | C  | cd121561 | Class_A |
| GSLYST00017834001 | non-specific | 320109 | 13  | 303 | 1.42E-13    | 69.584  | cd14978   | 7tmA_FMRFamide_R-like       | -  | cd128897 | Class_A |
| GSLYST00017834001 | non-specific | 313540 | 13  | 138 | 0.000800179 | 40.2501 | pfam10328 | 7TM_GPCR_Srx                | C  | cd121561 | Class_A |
| GSLYST00017836001 | specific     | 320324 | 1   | 302 | 3.42E-125   | 363.093 | cd15196   | 7tmA_Vasopressin_Oxytocin   | -  | cd128897 | Class_A |
| GSLYST00017836001 | non-specific | 222976 | 1   | 170 | 5.30E-07    | 50.9322 | PHAO3087  | PHAO3087                    | NC | cd127963 | Class_A |
| GSLYST00017880001 | specific     | 320109 | 43  | 340 | 4.79E-56    | 185.144 | cd14978   | 7tmA_FMRFamide_R-like       | -  | cd128897 | Class_A |
| GSLYST00017895001 | non-specific | 320109 | 23  | 342 | 3.07E-06    | 48.0128 | cd14978   | 7tmA_FMRFamide_R-like       | -  | cd128897 | Class_A |
| GSLYST00017958001 | specific     | 320086 | 6   | 197 | 1.51E-34    | 123.154 | cd00637   | 7tm_classA_rhodopsin-like   | N  | cd128897 | Class_A |
| GSLYST00017958001 | non-specific | 222976 | 5   | 205 | 1.20E-05    | 44.769  | PHAO3087  | PHAO3087                    | N  | cd127963 | Class_A |
| GSLYST00018112001 | non-specific | 291157 | 203 | 307 | 0.00226939  | 38.4475 | pfam14468 | DUF4427                     | -  | cd16903  | Class_A |
| GSLYST00018112001 | non-specific | 320109 | 49  | 248 | 1.85E-27    | 111.956 | cd14978   | 7tmA_FMRFamide_R-like       | C  | cd128897 | Class_A |
| GSLYST00018112001 | non-specific | 222976 | 53  | 222 | 2.96E-05    | 45.9246 | PHAO3087  | PHAO3087                    | C  | cd127963 | Class_A |
| GSLYST00018148001 | specific     | 315159 | 283 | 450 | 1.20E-38    | 138.099 | pfam12430 | ABA_GPCR                    | -  | cd13817  | Class_A |
| GSLYST00018148001 | specific     | 315250 | 143 | 210 | 1.01E-29    | 110.295 | pfam12537 | GPHR_N                      | -  | cd13913  | Class_A |
| GSLYST00018259001 | non-specific | 320124 | 1   | 113 | 3.55E-15    | 70.3208 | cd14993   | 7tmA_CCKR-like              | N  | cd128897 | Class_A |
| GSLYST00018259001 | non-specific | 222976 | 3   | 130 | 5.43E-08    | 50.547  | PHAO3087  | PHAO3087                    | N  | cd127963 | Class_A |
| GSLYST00018296001 | non-specific | 320109 | 121 | 266 | 2.76E-14    | 73.0508 | cd14978   | 7tmA_FMRFamide_R-like       | C  | cd128897 | Class_A |
| GSLYST00018296001 | non-specific | 222976 | 125 | 283 | 0.00186769  | 40.1467 | PHAO3087  | PHAO3087                    | C  | cd127963 | Class_A |
| GSLYST00018320001 | specific     | 320086 | 42  | 258 | 7.82E-29    | 115.45  | cd00637   | 7tm_classA_rhodopsin-like   | C  | cd128897 | Class_A |
| GSLYST00018321001 | specific     | 320086 | 22  | 223 | 2.74E-21    | 88.8716 | cd00637   | 7tm_classA_rhodopsin-like   | C  | cd128897 | Class_A |
| GSLYST00018324001 | non-specific | 320086 | 1   | 68  | 0.00454154  | 33.0176 | cd00637   | 7tm_classA_rhodopsin-like   | N  | cd128897 | Class_A |
| GSLYST00018384001 | specific     | 320086 | 1   | 265 | 1.74E-47    | 159.363 | cd00637   | 7tm_classA_rhodopsin-like   | -  | cd128897 | Class_A |
| GSLYST00018384001 | non-specific | 222976 | 2   | 165 | 5.43E-08    | 52.8582 | PHAO3087  | PHAO3087                    | NC | cd127963 | Class_A |
| GSLYST00018433001 | non-specific | 320109 | 2   | 290 | 3.15E-19    | 85.7624 | cd14978   | 7tmA_FMRFamide_R-like       | -  | cd128897 | Class_A |
| GSLYST00018481001 | non-specific | 320336 | 1   | 66  | 2.72E-10    | 54.3176 | cd15208   | 7tmA_OXR                    | NC | cd128897 | Class_A |
| GSLYST00018494001 | non-specific | 320117 | 54  | 432 | 1.54E-92    | 288.505 | cd14986   | 7tmA_Vasopressin-like       | -  | cd128897 | Class_A |
| GSLYST00018494001 | non-specific | 222976 | 13  | 244 | 5.71E-18    | 85.6002 | PHAO3087  | PHAO3087                    | C  | cd127963 | Class_A |
| GSLYST00018494001 | superfamily  | 331068 | 455 | 554 | 0.0011059   | 42.0699 | cd26247   | DNA_pol3_delta2 superfamily | NC | -        | Class_A |
| GSLYST00018494001 | non-specific | 237874 | 455 | 554 | 0.0011059   | 42.0699 | PRK14971  | PRK14971                    | NC | cd126247 | Class_A |
| GSLYST00018530001 | specific     | 320086 | 18  | 315 | 4.65E-58    | 187.868 | cd00637   | 7tm_classA_rhodopsin-like   | -  | cd128897 | Class_A |
| GSLYST00018530001 | non-specific | 222976 | 13  | 316 | 8.04E-16    | 76.7406 | PHAO3087  | PHAO3087                    | -  | cd127963 | Class_A |
| GSLYST00018558001 | non-specific | 320117 | 1   | 286 | 2.68E-96    | 290.816 | cd14986   | 7tmA_Vasopressin-like       | -  | cd128897 | Class_A |
| GSLYST00018656001 | specific     | 320086 | 44  | 177 | 8.82E-27    | 108.517 | cd00637   | 7tm_classA_rhodopsin-like   | C  | cd128897 | Class_A |
| GSLYST00018656001 | non-specific | 222976 | 50  | 186 | 0.00188057  | 40.1467 | PHAO3087  | PHAO3087                    | C  | cd127963 | Class_A |
| GSLYST00018656001 | non-specific | 320226 | 385 | 454 | 2.66E-07    | 51.6505 | cd15098   | 7tmA_Gal1_R                 | N  | cd128897 | Class_A |
| GSLYST00018718001 | non-specific | 320109 | 1   | 302 | 5.43E-27    | 106.948 | cd14978   | 7tmA_FMRFamide_R-like       | -  | cd128897 | Class_A |
| GSLYST00018718001 | non-specific | 313536 | 4   | 306 | 5.26E-10    | 59.148  | pfam10324 | 7TM_GPCR_Srw                | -  | cd121561 | Class_A |
| GSLYST00018755001 | non-specific | 320325 | 45  | 352 | 2.88E-107   | 138.985 | cd15197   | 7tmA_NPSR                   | -  | cd128897 | Class_A |
| GSLYST00018764001 | specific     | 320086 | 39  | 293 | 4.45E-13    | 68.0708 | cd00637   | 7tm_classA_rhodopsin-like   | -  | cd128897 | Class_A |
| GSLYST00018795001 | non-specific | 320109 | 21  | 316 | 9.46E-23    | 95.7776 | cd14978   | 7tmA_FMRFamide_R-like       | -  | cd128897 | Class_A |
| GSLYST00018795001 | non-specific | 313536 | 101 | 321 | 2.21E-05    | 45.2808 | pfam10324 | 7TM_GPCR_Srw                | N  | cd121561 | Class_A |
| GSLYST00018796001 | non-specific | 320109 | 30  | 325 | 1.98E-23    | 97.7036 | cd14978   | 7tmA_FMRFamide_R-like       | -  | cd128897 | Class_A |
| GSLYST00018796001 | non-specific | 313536 | 30  | 330 | 0.000795781 | 40.6584 | pfam10324 | 7TM_GPCR_Srw                | -  | cd121561 | Class_A |
| GSLYST00018797001 | non-specific | 320109 | 21  | 316 | 4.96E-26    | 104.637 | cd14978   | 7tmA_FMRFamide_R-like       | -  | cd128897 | Class_A |
| GSLYST00018797001 | non-specific | 313536 | 21  | 321 | 0.          |         |           |                             |    |          |         |

|                    |              |        |     |     |             |         |           |                           |    |         |         |
|--------------------|--------------|--------|-----|-----|-------------|---------|-----------|---------------------------|----|---------|---------|
| GSLYST00018955001  | non-specific | 222976 | 39  | 238 | 4.04E-11    | 64.4142 | PHA03087  | PHA03087                  | C  | c127963 | Class_A |
| GSLYST00018955001  | non-specific | 139494 | 280 | 406 | 3.08E-05    | 46.2726 | PRK13335  | PRK13335                  | C  | c127863 | Class_A |
| GSLYST00018955001  | superfamily  | 332684 | 280 | 406 | 3.08E-05    | 46.2726 | ci27863   | SSL_OB superfamily        | C  | -       | Class_A |
| GSLYST00018992001  | non-specific | 320109 | 51  | 335 | 8.26E-25    | 101.941 | cd14978   | 7tmA_FMRFamide_R-like     | -  | c128897 | Class_A |
| GSLYST00018992001  | non-specific | 222976 | 13  | 178 | 0.00576617  | 37.8355 | PHA03087  | PHA03087                  | C  | c127963 | Class_A |
| GSLYST00018993001  | superfamily  | 332784 | 12  | 121 | 7.22E-05    | 40.3684 | ci27963   | 7tm_1 superfamily         | C  | -       | Class_A |
| GSLYST00018994001  | specific     | 320086 | 3   | 283 | 2.18E-15    | 74.234  | cd00637   | 7tm_classA_rhodopsin-like | -  | c128897 | Class_A |
| GSLYST00018995001  | specific     | 320086 | 11  | 273 | 1.52E-13    | 68.8412 | cd00637   | 7tm_classA_rhodopsin-like | -  | c128897 | Class_A |
| GSLYST00019017001  | non-specific | 320109 | 58  | 359 | 1.30E-21    | 93.4664 | cd14978   | 7tmA_FMRFamide_R-like     | -  | c128897 | Class_A |
| GSLYST00019017001  | non-specific | 255903 | 66  | 363 | 0.0027569   | 38.7287 | pfam10320 | 7TM_GPCR_Srx              | -  | c121561 | Class_A |
| GSLYST00019107001  | non-specific | 320109 | 33  | 340 | 3.94E-19    | 86.1476 | cd14978   | 7tmA_FMRFamide_R-like     | -  | c128897 | Class_A |
| GSLYST00019107001  | non-specific | 313536 | 42  | 346 | 9.29E-05    | 43.3548 | pfam10324 | 7TM_GPCR_Srw              | -  | c121561 | Class_A |
| GSLYST00019108001  | non-specific | 320109 | 1   | 291 | 1.23E-19    | 86.5328 | cd14978   | 7tmA_FMRFamide_R-like     | -  | c128897 | Class_A |
| GSLYST00019108001  | non-specific | 313536 | 6   | 298 | 1.78E-06    | 48.3624 | pfam10324 | 7TM_GPCR_Srw              | -  | c121561 | Class_A |
| GSLYST00019116001  | non-specific | 320109 | 6   | 223 | 2.08E-14    | 70.7396 | cd14978   | 7tmA_FMRFamide_R-like     | N  | c128897 | Class_A |
| GSLYST00019154001  | non-specific | 320108 | 20  | 76  | 0.00743315  | 37.4017 | cd14977   | 7tmA_ET_R-like            | C  | c128897 | Class_A |
| GSLYST00019383001  | non-specific | 320109 | 25  | 334 | 2.53E-07    | 51.0944 | cd14978   | 7tmA_FMRFamide_R-like     | -  | c128897 | Class_A |
| GSLYST00019384001  | non-specific | 320109 | 51  | 365 | 2.28E-09    | 57.6428 | cd14978   | 7tmA_FMRFamide_R-like     | -  | c128897 | Class_A |
| GSLYST00019385001  | non-specific | 320109 | 43  | 365 | 2.63E-06    | 48.398  | cd14978   | 7tmA_FMRFamide_R-like     | -  | c128897 | Class_A |
| GSLYST00019386001  | non-specific | 320109 | 21  | 339 | 2.22E-11    | 63.4208 | cd14978   | 7tmA_FMRFamide_R-like     | -  | c128897 | Class_A |
| GSLYST00019387001  | non-specific | 320109 | 45  | 352 | 7.04E-08    | 53.0204 | cd14978   | 7tmA_FMRFamide_R-like     | -  | c128897 | Class_A |
| GSLYST00019388001  | non-specific | 320109 | 9   | 331 | 1.33E-06    | 49.1684 | cd14978   | 7tmA_FMRFamide_R-like     | -  | c128897 | Class_A |
| GSLYST00019389001  | non-specific | 320109 | 27  | 341 | 4.36E-11    | 62.6504 | cd14978   | 7tmA_FMRFamide_R-like     | -  | c128897 | Class_A |
| GSLYST00019390001  | non-specific | 320109 | 9   | 316 | 1.29E-07    | 51.8648 | cd14978   | 7tmA_FMRFamide_R-like     | -  | c128897 | Class_A |
| GSLYST00019391001  | non-specific | 320109 | 21  | 335 | 4.29E-12    | 65.732  | cd14978   | 7tmA_FMRFamide_R-like     | -  | c128897 | Class_A |
| GSLYST00019392001  | non-specific | 320109 | 20  | 338 | 4.69E-09    | 56.4872 | cd14978   | 7tmA_FMRFamide_R-like     | -  | c128897 | Class_A |
| GSLYST00019393001  | non-specific | 320109 | 34  | 346 | 9.16E-10    | 58.7984 | cd14978   | 7tmA_FMRFamide_R-like     | -  | c128897 | Class_A |
| GSLYST00019394001  | non-specific | 320109 | 34  | 346 | 4.32E-09    | 56.4872 | cd14978   | 7tmA_FMRFamide_R-like     | -  | c128897 | Class_A |
| GSLYST00019395001  | non-specific | 320109 | 33  | 346 | 9.71E-10    | 58.7984 | cd14978   | 7tmA_FMRFamide_R-like     | -  | c128897 | Class_A |
| GSLYST00019396001  | non-specific | 320109 | 33  | 345 | 1.20E-09    | 58.4132 | cd14978   | 7tmA_FMRFamide_R-like     | -  | c128897 | Class_A |
| GSLYST00019397001  | non-specific | 320109 | 33  | 345 | 2.96E-10    | 60.3392 | cd14978   | 7tmA_FMRFamide_R-like     | -  | c128897 | Class_A |
| GSLYST00019398001  | non-specific | 320109 | 51  | 377 | 1.48E-09    | 58.4132 | cd14978   | 7tmA_FMRFamide_R-like     | -  | c128897 | Class_A |
| GSLYST00019477001  | superfamily  | 333717 | 35  | 270 | 1.59E-05    | 45.6673 | cd28897   | 7tm_GPCRs superfamily     | -  | -       | Class_A |
| GSLYST00019477001  | non-specific | 320420 | 35  | 270 | 1.59E-05    | 45.6673 | cd15293   | 7tmC_GPR158-like          | -  | c128897 | Class_A |
| GSLYST00019502001  | specific     | 320086 | 15  | 280 | 1.41E-33    | 123.54  | cd00637   | 7tm_classA_rhodopsin-like | -  | c128897 | Class_A |
| GSLYST00019502001  | non-specific | 222976 | 7   | 136 | 8.47E-05    | 43.2282 | PHA03087  | PHA03087                  | C  | c127963 | Class_A |
| GSLYST00019519001  | specific     | 320086 | 60  | 263 | 6.69E-27    | 110.828 | cd00637   | 7tm_classA_rhodopsin-like | C  | c128897 | Class_A |
| GSLYST00019519001  | non-specific | 320086 | 653 | 744 | 8.86E-10    | 59.9816 | cd00637   | 7tm_classA_rhodopsin-like | N  | c128897 | Class_A |
| GSLYST00019636001  | non-specific | 320132 | 95  | 435 | 3.58E-75    | 237.174 | cd15001   | 7tmA_GPRna14-like         | -  | c128897 | Class_A |
| GSLYST00019636001  | non-specific | 222976 | 99  | 437 | 1.72E-17    | 83.289  | PHA03087  | PHA03087                  | -  | c127963 | Class_A |
| GSLYST00019782001  | non-specific | 320109 | 29  | 347 | 2.90E-14    | 71.8952 | cd14978   | 7tmA_FMRFamide_R-like     | -  | c128897 | Class_A |
| GSLYST00019783001  | non-specific | 320109 | 47  | 362 | 2.59E-13    | 69.584  | cd14978   | 7tmA_FMRFamide_R-like     | -  | c128897 | Class_A |
| GSLYST00019784001  | non-specific | 320109 | 21  | 340 | 3.95E-11    | 62.6504 | cd14978   | 7tmA_FMRFamide_R-like     | -  | c128897 | Class_A |
| GSLYST00019785001  | non-specific | 320109 | 4   | 170 | 0.000477576 | 39.9237 | cd14978   | 7tmA_FMRFamide_R-like     | C  | c128897 | Class_A |
| GSLYST00019786001  | non-specific | 320109 | 22  | 331 | 3.65E-09    | 56.8724 | cd14978   | 7tmA_FMRFamide_R-like     | -  | c128897 | Class_A |
| GSLYST00019787001  | non-specific | 320109 | 13  | 334 | 4.92E-11    | 62.2652 | cd14978   | 7tmA_FMRFamide_R-like     | -  | c128897 | Class_A |
| GSLYST00019788001  | non-specific | 320109 | 22  | 331 | 9.43E-10    | 58.4132 | cd14978   | 7tmA_FMRFamide_R-like     | -  | c128897 | Class_A |
| GSLYST00019789001  | non-specific | 320109 | 13  | 334 | 3.08E-10    | 59.954  | cd14978   | 7tmA_FMRFamide_R-like     | -  | c128897 | Class_A |
| GSLYST00019791001  | non-specific | 320109 | 22  | 335 | 2.13E-10    | 60.3392 | cd14978   | 7tmA_FMRFamide_R-like     | -  | c128897 | Class_A |
| GSLYST00019793001  | non-specific | 320109 | 10  | 316 | 4.63E-11    | 62.2652 | cd14978   | 7tmA_FMRFamide_R-like     | -  | c128897 | Class_A |
| GSLYST00019794001  | non-specific | 320109 | 20  | 294 | 2.84E-06    | 47.6276 | cd14978   | 7tmA_FMRFamide_R-like     | -  | c128897 | Class_A |
| GSLYST00019795001  | non-specific | 320109 | 13  | 327 | 4.54E-06    | 47.2424 | cd14978   | 7tmA_FMRFamide_R-like     | -  | c128897 | Class_A |
| GSLYST00019796001  | non-specific | 320109 | 42  | 356 | 4.70E-10    | 59.5688 | cd14978   | 7tmA_FMRFamide_R-like     | -  | c128897 | Class_A |
| GSLYST00019797001  | non-specific | 320109 | 15  | 328 | 5.98E-09    | 56.102  | cd14978   | 7tmA_FMRFamide_R-like     | -  | c128897 | Class_A |
| GSLYST00019798001  | non-specific | 320109 | 22  | 337 | 8.91E-14    | 70.7396 | cd14978   | 7tmA_FMRFamide_R-like     | -  | c128897 | Class_A |
| GSLYST00019799001  | non-specific | 320109 | 3   | 309 | 2.63E-09    | 57.2576 | cd14978   | 7tmA_FMRFamide_R-like     | -  | c128897 | Class_A |
| GSLYST00019857001  | specific     | 320109 | 8   | 247 | 7.92E-46    | 155.869 | cd14978   | 7tmA_FMRFamide_R-like     | N  | c128897 | Class_A |
| GSLYST00019857001  | non-specific | 313536 | 16  | 251 | 3.08E-16    | 76.8672 | pfam10324 | 7TM_GPCR_Srw              | N  | c121561 | Class_A |
| GSLYST00019858001  | specific     | 320109 | 63  | 365 | 2.19E-71    | 225.59  | cd14978   | 7tmA_FMRFamide_R-like     | -  | c128897 | Class_A |
| GSLYST00019858001  | non-specific | 313536 | 66  | 369 | 9.98E-32    | 122.321 | pfam10324 | 7TM_GPCR_Srw              | -  | c121561 | Class_A |
| GSLYST00019858001  | non-specific | 222976 | 74  | 250 | 1.57E-05    | 46.3098 | PHA03087  | PHA03087                  | C  | c127963 | Class_A |
| GSLYST00019942001  | non-specific | 320109 | 3   | 283 | 3.74E-24    | 98.474  | cd14978   | 7tmA_FMRFamide_R-like     | -  | c128897 | Class_A |
| GSLYST00019942001  | non-specific | 222976 | 3   | 228 | 1.23E-05    | 45.9246 | PHA03087  | PHA03087                  | C  | c127963 | Class_A |
| GSLYST00019944001  | non-specific | 320109 | 1   | 287 | 3.45E-22    | 94.2368 | cd14978   | 7tmA_FMRFamide_R-like     | -  | c128897 | Class_A |
| GSLYST00019944001  | non-specific | 222976 | 7   | 296 | 0.00031979  | 41.6874 | PHA03087  | PHA03087                  | -  | c127963 | Class_A |
| GSLYST00019973001  | non-specific | 320109 | 5   | 92  | 2.66E-06    | 43.3904 | cd14978   | 7tmA_FMRFamide_R-like     | N  | c128897 | Class_A |
| GSLYST00019981001  | non-specific | 320109 | 6   | 281 | 9.15E-16    | 75.7472 | cd14978   | 7tmA_FMRFamide_R-like     | -  | c128897 | Class_A |
| GSLYST00019982001  | non-specific | 320109 | 13  | 322 | 1.61E-18    | 84.2216 | cd14978   | 7tmA_FMRFamide_R-like     | -  | c128897 | Class_A |
| GSLYST00019982001  | non-specific | 313536 | 45  | 328 | 0.000218147 | 42.1992 | pfam10324 | 7TM_GPCR_Srw              | -  | c121561 | Class_A |
| GSLYST00019985001  | non-specific | 320109 | 2   | 327 | 1.09E-15    | 76.1324 | cd14978   | 7tmA_FMRFamide_R-like     | -  | c128897 | Class_A |
| GSLYST00020000001  | non-specific | 320109 | 1   | 319 | 1.47E-13    | 69.584  | cd14978   | 7tmA_FMRFamide_R-like     | -  | c128897 | Class_A |
| GSLYST00020000001  | non-specific | 313540 | 1   | 196 | 1.55E-05    | 45.6429 | pfam10328 | 7TM_GPCR_Srx              | C  | c121561 | Class_A |
| GSLYST00020001001  | non-specific | 320109 | 30  | 309 | 3.78E-11    | 62.6504 | cd14978   | 7tmA_FMRFamide_R-like     | -  | c128897 | Class_A |
| GSLYST000200017001 | non-specific | 320109 | 17  | 288 | 7.28E-10    | 58.4132 | cd14978   | 7tmA_FMRFamide_R-like     | -  | c128897 | Class_A |
| GSLYST000200055001 | non-specific | 320109 | 31  | 351 | 1.32E-21    | 93.0812 | cd14978   | 7tmA_FMRFamide_R-like     | -  | c128897 | Class_A |
| GSLYST000200084001 | non-specific | 320109 | 1   | 315 | 4.59E-17    | 79.9844 | cd14978   | 7tmA_FMRFamide_R-like     | -  | c128897 | Class_A |
| GSLYST00020136001  | non-specific | 320109 | 2   | 285 | 8.85E-16    | 75.7472 | cd14978   | 7tmA_FMRFamide_R-like     | -  | c128897 | Class_A |
| GSLYST00020197001  | non-specific | 320109 | 5   | 129 | 4.92E-15    | 73.436  | cd14978   | 7tmA_FMRFamide_R-like     | C  | c128897 | Class_A |
| GSLYST00020204001  | non-specific | 320109 | 11  | 280 | 4.26E-16    | 76.5176 | cd14978   | 7tmA_FMRFamide_R-like     | -  | c128897 | Class_A |
| GSLYST00020205001  | non-specific | 320109 | 13  | 314 | 5.08E-24    | 99.2444 | cd14978   | 7tmA_FMRFamide_R-like     | -  | c128897 | Class_A |
| GSLYST00020268001  | specific     | 320420 | 102 | 303 | 2.85E-85    | 256.371 | cd15293   | 7tmC_GPR158-like          | C  | c128897 | Class_A |
| GSLYST00020280001  | non-specific | 320109 | 25  | 321 | 1.67E-26    | 106.178 | cd14978   | 7tmA_FMRFamide_R-like     | -  | c128897 | Class_A |
| GSLYST00020280001  | non-specific | 222976 | 20  | 274 | 0.000600807 | 40.9171 | PHA03087  | PHA03087                  | -  | c127963 | Class_A |
| GSLYST00020285001  | non-specific | 320109 | 1   | 200 | 4.72E-16    | 74.5916 | cd14978   | 7tmA_FMRFamide_R-like     | N  | c128897 | Class_A |
| GSLYST00020305001  | non-specific | 320109 | 4   | 291 | 5.59E-24    | 98.8592 | cd14978   | 7tmA_FMRFamide_R-like     | -  | c128897 | Class_A |
| GSLYST00020316001  | non-specific | 320109 | 12  | 310 | 7.92E-26    | 104.252 | cd14978   | 7tmA_FMRFamide_R-like     | -  | c128897 | Class_A |
| GSLYST00020340001  | non-specific | 320109 | 4   | 303 | 9.90E-24    | 98.0888 | cd14978   | 7tmA_FMRFamide_R-like     | -  | c128897 | Class_A |
| GSLYST00020340001  | non-specific | 313540 | 11  | 246 | 4.35E-08    | 52.9617 | pfam10328 | 7TM_GPCR_Srx              | -  | c121561 | Class_A |
| GSLYST00020340001  | non-specific | 165021 | 11  | 218 | 0.0098339   | 37.3002 | PHA02638  | PHA02638                  | NC | c127963 | Class_A |
| GSLYST00020341001  | non-specific | 320109 | 28  | 327 | 1.15E-21    | 93.0812 | cd14978   | 7tmA_FMRFamide_R-like     | -  | c128897 | Class_A |
| GSLYST00020342001  | non-specific | 320109 | 4   | 303 | 3.81E-22    | 93.8516 | cd14978   | 7tmA_FMRFamide_R-like     | -  | c128897 | Class_A |
| GSLYST00020342001  | non-specific | 313540 | 11  | 246 | 2.34E-09    | 56.8137 | pfam10328 | 7TM_GPCR_Srx              | -  | c121561 | Class_A |
| GSLYST00020342001  | non-specific | 165021 | 10  | 254 | 0.0018087   | 39.6114 | PHA02638  | PHA02638                  | N  | c127963 | Class_A |
| GSLYST00020343001  | non-specific | 320109 | 4   | 303 | 1.10E-22    | 95.3924 | cd14978   | 7tmA_FMRFamide_R-like     | -  | c128897 | Class_A |
| GSLYST00020343001  | non-specific | 313540 | 11  | 246 | 7.28E-08    | 52.5765 | pfam10328 | 7TM_GPCR_Srx              | -  | c121561 | Class_A |
| GSLYST00020344001  | non-specific | 320109 | 1   | 291 | 7.38E-18    | 81.5252 | cd14978   | 7tmA_FMRFamide_R-like     | -  |         |         |

|                   |              |        |      |      |             |         |            |                               |    |         |         |
|-------------------|--------------|--------|------|------|-------------|---------|------------|-------------------------------|----|---------|---------|
| GSLYST00020795001 | superfamily  | 314733 | 151  | 426  | 3.76E-83    | 257.174 | cl13359    | GPCR_chapero_1 superfamily    | -  | -       | Class_A |
| GSLYST00020795001 | specific     | 238125 | 7    | 85   | 4.28E-21    | 88.2094 | cd00204    | ANK                           | C  | cl02529 | Class_A |
| GSLYST00020795001 | superfamily  | 321973 | 7    | 85   | 4.28E-21    | 88.2094 | cl02529    | ANK superfamily               | C  | -       | Class_A |
| GSLYST00020795001 | specific     | 315466 | 8    | 80   | 2.26E-15    | 70.9089 | pfam12796  | Ank_2                         | C  | cl26073 | Class_A |
| GSLYST00020795001 | superfamily  | 330894 | 8    | 80   | 2.26E-15    | 70.9089 | cl26073    | Ank_2 superfamily             | C  | -       | Class_A |
| GSLYST00020795001 | specific     | 223738 | 7    | 92   | 2.24E-10    | 60.2231 | COG0666    | ANKYR                         | N  | cl26073 | Class_A |
| GSLYST00020795001 | non-specific | 165205 | 8    | 89   | 3.42E-10    | 61.518  | PHA02874   | PHA02874                      | NC | cl26073 | Class_A |
| GSLYST00020840001 | non-specific | 320109 | 74   | 211  | 9.19E-25    | 98.8592 | cd14978    | 7tmA_FMRFamide_R-like         | C  | cl28897 | Class_A |
| GSLYST00020840001 | non-specific | 313536 | 77   | 212  | 8.05E-06    | 45.666  | pfam10324  | 7TM_GPCR_Srw                  | C  | cl21561 | Class_A |
| GSLYST00020843001 | non-specific | 222976 | 21   | 223  | 1.41E-09    | 59.0214 | PHA03087   | PHA03087                      | C  | cl27963 | Class_A |
| GSLYST00020843001 | non-specific | 320101 | 355  | 418  | 0.000382265 | 41.8965 | cd14970    | 7tmA_Opioid_R-like            | N  | cl28897 | Class_A |
| GSLYST00020845001 | non-specific | 222976 | 12   | 176  | 9.06E-08    | 54.399  | PHA03087   | PHA03087                      | C  | cl27963 | Class_A |
| GSLYST00020845001 | non-specific | 320117 | 642  | 766  | 1.61E-06    | 50.4519 | cd14986    | 7tmA_Vasopressin-like         | N  | cl28897 | Class_A |
| GSLYST00020925001 | non-specific | 320109 | 35   | 336  | 1.32E-21    | 93.0812 | cd14978    | 7tmA_FMRFamide_R-like         | -  | cl28897 | Class_A |
| GSLYST00021115001 | non-specific | 320109 | 62   | 97   | 1.00E-10    | 56.102  | cd14978    | 7tmA_FMRFamide_R-like         | C  | cl28897 | Class_A |
| GSLYST00021231001 | non-specific | 320086 | 12   | 139  | 0.00384677  | 35.714  | cd00637    | 7tm_classA_rhodopsin-like     | C  | cl28897 | Class_A |
| GSLYST00021326001 | non-specific | 320109 | 47   | 362  | 3.95E-16    | 78.0584 | cd14978    | 7tmA_FMRFamide_R-like         | -  | cl28897 | Class_A |
| GSLYST00021360001 | non-specific | 320109 | 1    | 210  | 1.21E-07    | 50.7092 | cd14978    | 7tmA_FMRFamide_R-like         | N  | cl28897 | Class_A |
| GSLYST00021362001 | non-specific | 320109 | 20   | 318  | 9.79E-19    | 84.6068 | cd14978    | 7tmA_FMRFamide_R-like         | -  | cl28897 | Class_A |
| GSLYST00021363001 | non-specific | 320109 | 20   | 312  | 4.07E-19    | 85.3772 | cd14978    | 7tmA_FMRFamide_R-like         | -  | cl28897 | Class_A |
| GSLYST00021412001 | non-specific | 320124 | 1    | 208  | 6.42E-36    | 128.101 | cd14993    | 7tmA_CCKR-like                | N  | cl28897 | Class_A |
| GSLYST00021412001 | non-specific | 165021 | 12   | 226  | 9.63E-11    | 60.4122 | PHA02638   | PHA02638                      | N  | cl27963 | Class_A |
| GSLYST00021539001 | non-specific | 320109 | 1    | 135  | 6.97E-06    | 44.9312 | cd14978    | 7tmA_FMRFamide_R-like         | N  | cl28897 | Class_A |
| GSLYST00021540001 | non-specific | 320109 | 10   | 135  | 1.33E-12    | 62.6504 | cd14978    | 7tmA_FMRFamide_R-like         | C  | cl28897 | Class_A |
| GSLYST00021592001 | non-specific | 320124 | 1    | 234  | 2.16E-62    | 196.666 | cd14993    | 7tmA_CCKR-like                | N  | cl28897 | Class_A |
| GSLYST00021592001 | non-specific | 222976 | 3    | 230  | 4.90E-06    | 46.3098 | PHA03087   | PHA03087                      | N  | cl27963 | Class_A |
| GSLYST00021598001 | non-specific | 320109 | 18   | 276  | 2.67E-14    | 71.1248 | cd14978    | 7tmA_FMRFamide_R-like         | -  | cl28897 | Class_A |
| GSLYST00021598001 | non-specific | 313536 | 18   | 264  | 1.29E-05    | 45.666  | pfam10324  | 7TM_GPCR_Srw                  | -  | cl21561 | Class_A |
| GSLYST00021661001 | specific     | 320109 | 1    | 240  | 7.01E-53    | 172.432 | cd14978    | 7tmA_FMRFamide_R-like         | -  | cl28897 | Class_A |
| GSLYST00021869001 | specific     | 320086 | 147  | 403  | 1.04E-26    | 109.672 | cd00637    | 7tm_classA_rhodopsin-like     | -  | cl28897 | Class_A |
| GSLYST00021869001 | non-specific | 222976 | 113  | 281  | 3.04E-08    | 55.5546 | PHA03087   | PHA03087                      | C  | cl27963 | Class_A |
| GSLYST00021869001 | non-specific | 320646 | 515  | 568  | 0.00012627  | 44.1072 | cd15980    | 7tmA_NPFFR2                   | N  | cl28897 | Class_A |
| GSLYST00021930001 | non-specific | 320098 | 28   | 299  | 2.24E-39    | 138.465 | cd14967    | 7tmA_amine_R-like             | -  | cl28897 | Class_A |
| GSLYST00021943001 | specific     | 320100 | 3    | 219  | 4.91E-71    | 218.229 | cd14969    | 7tmA_Opsins_type2_animals     | -  | cl28897 | Class_A |
| GSLYST00021943001 | non-specific | 222976 | 19   | 198  | 3.09E-14    | 70.1922 | PHA03087   | PHA03087                      | NC | cl27963 | Class_A |
| GSLYST00022238001 | non-specific | 320109 | 1    | 350  | 2.06E-08    | 54.5612 | cd14978    | 7tmA_FMRFamide_R-like         | -  | cl28897 | Class_A |
| GSLYST00022429001 | non-specific | 320109 | 101  | 316  | 1.07E-07    | 52.25   | cd14978    | 7tmA_FMRFamide_R-like         | N  | cl28897 | Class_A |
| GSLYST00000610001 | superfamily  | 306508 | 69   | 327  | 2.27E-58    | 188.614 | pfam00002  | 7tm_2                         | -  | cl21561 | Class_B |
| GSLYST00000610001 | superfamily  | 328797 | 69   | 327  | 2.27E-58    | 188.614 | cl21561    | 7tm_4 superfamily             | -  | -       | Class_B |
| GSLYST00000610001 | superfamily  | 333717 | 70   | 343  | 1.40E-93    | 280.044 | cl28897    | 7tm_GPCRs superfamily         | -  | -       | Class_B |
| GSLYST00000610001 | non-specific | 320400 | 70   | 343  | 1.40E-93    | 280.044 | cd15272    | 7tmB1_PTH-R_related           | -  | cl28897 | Class_B |
| GSLYST00000610001 | specific     | 214468 | 1    | 63   | 2.88E-13    | 64.0728 | smart00008 | HormR                         | -  | cl02422 | Class_B |
| GSLYST00000610001 | specific     | 308439 | 1    | 58   | 9.80E-18    | 75.8885 | pfam02793  | HRM                           | -  | cl02422 | Class_B |
| GSLYST00000610001 | superfamily  | 321928 | 1    | 58   | 9.80E-18    | 75.8885 | cl02422    | HRM superfamily               | -  | -       | Class_B |
| GSLYST00000732001 | specific     | 306508 | 157  | 410  | 6.77E-75    | 239.846 | pfam00002  | 7tm_2                         | -  | cl21561 | Class_B |
| GSLYST00000732001 | superfamily  | 328797 | 157  | 410  | 6.77E-75    | 239.846 | cl21561    | 7tm_4 superfamily             | -  | -       | Class_B |
| GSLYST00000732001 | superfamily  | 333717 | 151  | 431  | 4.90E-126   | 373.647 | cl28897    | 7tm_GPCRs superfamily         | -  | -       | Class_B |
| GSLYST00000732001 | non-specific | 320400 | 151  | 431  | 4.90E-126   | 373.647 | cd15272    | 7tmB1_PTH-R_related           | -  | cl28897 | Class_B |
| GSLYST00000732001 | specific     | 214468 | 70   | 142  | 4.59E-15    | 69.8508 | smart00008 | HormR                         | -  | cl02422 | Class_B |
| GSLYST00000732001 | specific     | 308439 | 70   | 140  | 1.15E-17    | 77.0441 | pfam02793  | HRM                           | -  | cl02422 | Class_B |
| GSLYST00000732001 | superfamily  | 321928 | 70   | 140  | 1.15E-17    | 77.0441 | cl02422    | HRM superfamily               | -  | -       | Class_B |
| GSLYST00000732001 | superfamily  | 320873 | 274  | 429  | 6.09E-05    | 45.9148 | cl00275    | Heme_Cu_Oxidase_1 superfamily | NC | -       | Class_B |
| GSLYST00000732001 | non-specific | 225795 | 274  | 429  | 6.09E-05    | 45.9148 | COG3256    | NorB                          | NC | cl00275 | Class_B |
| GSLYST00001176001 | superfamily  | 333717 | 1414 | 1641 | 6.57E-25    | 105.733 | cl28897    | 7tm_GPCRs superfamily         | -  | -       | Class_B |
| GSLYST00001176001 | non-specific | 320168 | 1414 | 1641 | 6.57E-25    | 105.733 | cd15040    | 7tmB2_Adhesion                | -  | cl28897 | Class_B |
| GSLYST00001176001 | non-specific | 197594 | 683  | 802  | 5.46E-08    | 51.8715 | smart00237 | Calk_beta                     | -  | cl02522 | Class_B |
| GSLYST00001176001 | non-specific | 197594 | 207  | 289  | 0.00241062  | 38.7747 | smart00237 | Calk_beta                     | -  | cl02522 | Class_B |
| GSLYST00001176001 | non-specific | 308663 | 556  | 647  | 9.16E-09    | 54.1779 | pfam03160  | Calk-beta                     | -  | cl02522 | Class_B |
| GSLYST00001176001 | superfamily  | 321969 | 207  | 289  | 0.00241062  | 38.7747 | cl02522    | Calk-beta superfamily         | -  | -       | Class_B |
| GSLYST00001176001 | non-specific | 197639 | 1320 | 1366 | 0.000143664 | 40.8338 | smart00303 | GPS                           | -  | cl02559 | Class_B |
| GSLYST00001176001 | specific     | 307782 | 1319 | 1365 | 0.000646729 | 38.8871 | pfam01825  | GPS                           | -  | cl02559 | Class_B |
| GSLYST00001176001 | superfamily  | 321989 | 1320 | 1366 | 0.000143664 | 40.8338 | cl02559    | GPS superfamily               | -  | -       | Class_B |
| GSLYST00001176001 | non-specific | 306508 | 1374 | 1565 | 3.14E-12    | 68.0467 | pfam00002  | 7tm_2                         | C  | cl21561 | Class_B |
| GSLYST00001176001 | superfamily  | 328797 | 1374 | 1565 | 3.14E-12    | 68.0467 | cl21561    | 7tm_4 superfamily             | C  | -       | Class_B |
| GSLYST00001176001 | non-specific | 273296 | 552  | 804  | 3.11E-14    | 78.2952 | TIGR00845  | coca                          | NC | cl02522 | Class_B |
| GSLYST00001176001 | non-specific | 273296 | 10   | 160  | 0.000169486 | 46.3236 | TIGR00845  | coca                          | NC | cl02522 | Class_B |
| GSLYST00001176001 | superfamily  | 321969 | 552  | 804  | 3.11E-14    | 78.2952 | cl02522    | Calk-beta superfamily         | NC | -       | Class_B |
| GSLYST00001176001 | superfamily  | 321969 | 10   | 160  | 0.000169486 | 46.3236 | cl02522    | Calk-beta superfamily         | NC | -       | Class_B |
| GSLYST00001547001 | non-specific | 306508 | 1    | 87   | 1.27E-13    | 63.0391 | pfam00002  | 7tm_2                         | C  | cl21561 | Class_B |
| GSLYST00001547001 | superfamily  | 328797 | 1    | 87   | 1.27E-13    | 63.0391 | cl21561    | 7tm_4 superfamily             | C  | -       | Class_B |
| GSLYST00001547001 | superfamily  | 333717 | 1    | 87   | 5.82E-31    | 109.4   | cl28897    | 7tm_GPCRs superfamily         | C  | -       | Class_B |
| GSLYST00001547001 | non-specific | 320400 | 1    | 87   | 5.82E-31    | 109.4   | cd15272    | 7tmB1_PTH-R_related           | C  | cl28897 | Class_B |
| GSLYST00001548001 | non-specific | 306508 | 1    | 81   | 2.14E-19    | 79.2175 | pfam00002  | 7tm_2                         | N  | cl21561 | Class_B |
| GSLYST00001548001 | superfamily  | 328797 | 1    | 81   | 2.14E-19    | 79.2175 | cl21561    | 7tm_4 superfamily             | N  | -       | Class_B |
| GSLYST00001548001 | superfamily  | 333717 | 1    | 102  | 2.17E-44    | 144.839 | cl28897    | 7tm_GPCRs superfamily         | N  | -       | Class_B |
| GSLYST00001548001 | non-specific | 320400 | 1    | 102  | 2.17E-44    | 144.839 | cd15272    | 7tmB1_PTH-R_related           | N  | cl28897 | Class_B |
| GSLYST00001571001 | superfamily  | 333717 | 2    | 171  | 5.31E-17    | 75.7236 | cl28897    | 7tm_GPCRs superfamily         | N  | -       | Class_B |
| GSLYST00001571001 | non-specific | 320167 | 2    | 171  | 5.31E-17    | 75.7236 | cd15039    | 7tmB3_Methuselah-like         | N  | cl28897 | Class_B |
| GSLYST00001572001 | superfamily  | 333717 | 1    | 154  | 3.44E-15    | 70.716  | cl28897    | 7tm_GPCRs superfamily         | C  | -       | Class_B |
| GSLYST00001572001 | non-specific | 320167 | 1    | 154  | 3.44E-15    | 70.716  | cd15039    | 7tmB3_Methuselah-like         | C  | cl28897 | Class_B |
| GSLYST00001573001 | superfamily  | 333717 | 1    | 142  | 4.49E-20    | 83.0424 | cl28897    | 7tm_GPCRs superfamily         | C  | -       | Class_B |
| GSLYST00001573001 | non-specific | 320167 | 1    | 142  | 4.49E-20    | 83.0424 | cd15039    | 7tmB3_Methuselah-like         | C  | cl28897 | Class_B |
| GSLYST00001575001 | superfamily  | 333717 | 1    | 90   | 4.85E-14    | 64.5528 | cl28897    | 7tm_GPCRs superfamily         | C  | -       | Class_B |
| GSLYST00001575001 | non-specific | 320167 | 1    | 90   | 4.85E-14    | 64.5528 | cd15039    | 7tmB3_Methuselah-like         | C  | cl28897 | Class_B |
| GSLYST00001619001 | superfamily  | 333717 | 2    | 37   | 0.00333525  | 34.8924 | cl28897    | 7tm_GPCRs superfamily         | NC | -       | Class_B |
| GSLYST00001619001 | non-specific | 320167 | 2    | 37   | 0.00333525  | 34.8924 | cd15039    | 7tmB3_Methuselah-like         | NC | cl28897 | Class_B |
| GSLYST00001859001 | non-specific | 306508 | 204  | 464  | 1.86E-36    | 135.842 | pfam00002  | 7tm_2                         | -  | cl21561 | Class_B |
| GSLYST00001859001 | superfamily  | 328797 | 204  | 464  | 1.86E-36    | 135.842 | cl21561    | 7tm_4 superfamily             | -  | -       | Class_B |
| GSLYST00001859001 | superfamily  | 333717 | 204  | 485  | 4.28E-115   | 342.281 | cl28897    | 7tm_GPCRs superfamily         | -  | -       | Class_B |
| GSLYST00001859001 | specific     | 320169 | 204  | 485  | 4.28E-115   | 342.281 | cd15041    | 7tmB1_hormone_R               | -  | cl28897 | Class_B |
| GSLYST00001859001 | specific     | 214468 | 132  | 179  | 1.27E-11    | 60.2208 | smart00008 | HormR                         | C  | cl02422 | Class_B |
| GSLYST00001859001 | specific     | 308439 | 132  | 179  | 1.47E-12    | 62.4065 | pfam02793  | HRM                           | C  | cl02422 | Class_B |
| GSLYST00001859001 | superfamily  | 321928 | 132  | 179  | 1.47E-12    | 62.4065 | cl02422    | HRM superfamily               | C  | -       | Class_B |
| GSLYST00001860001 | specific     | 306508 | 141  | 399  | 9.24E-80    | 252.943 | pfam00002  | 7tm_2                         | -  | cl21561 | Class_B |
| GSLYST00001860001 | superfamily  | 328797 | 141  | 399  | 9.24E-80    | 252.943 | cl21561    | 7tm_4 superfamily             | -  | -       | Class_B |
| GSLYST00001860001 | superfamily  | 333717 | 138  | 420  | 4.88E-139   | 407.16  | cl28897    | 7tm_GPCRs superfamily         | -  | -       | Class_B |
| GSLYST00001860001 | non-specific | 320400 | 138  | 420  | 4.88E-139   | 407.16  | cd15272    | 7tmB1_PTH-R_related           | -  | cl28897 | Class_B |
| GSLYST00001860001 | specific     | 214468 | 59   | 131  | 6.59E-25    | 97.9704 | smart00008 | HormR                         | -  | cl02422 | Class_B |
| GSLYST00001860001 | specific     | 308439 | 58   | 123  | 9.50E-27    |         |            |                               |    |         |         |

|                   |              |        |      |      |             |           |            |                                     |    |         |         |
|-------------------|--------------|--------|------|------|-------------|-----------|------------|-------------------------------------|----|---------|---------|
| GSLYST00004304001 | non-specific | 306508 | 198  | 424  | 1.52E-20    | 90.0031   | pfam00002  | 7tm_2                               | -  | cl21561 | Class_B |
| GSLYST00004304001 | superfamily  | 328797 | 198  | 424  | 1.52E-20    | 90.0031   | cl21561    | 7tm_4 superfamily                   | -  | -       | Class_B |
| GSLYST00004304001 | superfamily  | 333717 | 192  | 436  | 6.65E-40    | 143.16    | cl28897    | 7tm_GPCRs superfamily               | -  | -       | Class_B |
| GSLYST00004304001 | non-specific | 320557 | 192  | 436  | 6.65E-40    | 143.16    | cl215441   | 7tmB2_CELSR_Adhesion_IV             | -  | cl28897 | Class_B |
| GSLYST00005400001 | non-specific | 306508 | 1010 | 1305 | 5.16E-15    | 76.1359   | pfam00002  | 7tm_2                               | -  | cl21561 | Class_B |
| GSLYST00005400001 | superfamily  | 328797 | 1010 | 1305 | 5.16E-15    | 76.1359   | cl21561    | 7tm_4 superfamily                   | -  | -       | Class_B |
| GSLYST00005400001 | superfamily  | 333717 | 999  | 1320 | 4.26E-79    | 261.775   | cl28897    | 7tm_GPCRs superfamily               | -  | -       | Class_B |
| GSLYST00005400001 | specific     | 320167 | 999  | 1320 | 4.26E-79    | 261.775   | cl215039   | 7tmB3_Methuselah-like               | -  | cl28897 | Class_B |
| GSLYST00005590001 | non-specific | 306508 | 143  | 388  | 4.39E-49    | 169.354   | pfam00002  | 7tm_2                               | -  | cl21561 | Class_B |
| GSLYST00005590001 | superfamily  | 328797 | 143  | 388  | 4.39E-49    | 169.354   | cl21561    | 7tm_4 superfamily                   | -  | -       | Class_B |
| GSLYST00005590001 | superfamily  | 333717 | 142  | 403  | 1.53E-100   | 303.34    | cl28897    | 7tm_GPCRs superfamily               | -  | -       | Class_B |
| GSLYST00005590001 | specific     | 320168 | 142  | 403  | 1.53E-100   | 303.34    | cl215040   | 7tmB2_Adhesion                      | -  | cl28897 | Class_B |
| GSLYST00005590001 | specific     | 307782 | 88   | 128  | 1.78E-10    | 55.8359   | pfam01825  | GPS                                 | -  | cl02559 | Class_B |
| GSLYST00005590001 | specific     | 197639 | 86   | 133  | 2.04E-09    | 53.1602   | smart00303 | GPS                                 | -  | cl02559 | Class_B |
| GSLYST00005590001 | superfamily  | 321989 | 88   | 128  | 1.78E-10    | 55.8359   | cl02559    | GPS superfamily                     | -  | -       | Class_B |
| GSLYST00005707001 | non-specific | 306508 | 976  | 1214 | 5.11E-38    | 142.775   | pfam00002  | 7tm_2                               | -  | cl21561 | Class_B |
| GSLYST00005707001 | superfamily  | 328797 | 976  | 1214 | 5.11E-38    | 142.775   | cl21561    | 7tm_4 superfamily                   | -  | -       | Class_B |
| GSLYST00005707001 | superfamily  | 333717 | 977  | 1229 | 1.90E-100   | 320.289   | cl28897    | 7tm_GPCRs superfamily               | -  | -       | Class_B |
| GSLYST00005707001 | specific     | 320168 | 977  | 1229 | 1.90E-100   | 320.289   | cl215040   | 7tmB2_Adhesion                      | -  | cl28897 | Class_B |
| GSLYST00005707001 | non-specific | 214480 | 41   | 179  | 0.000361987 | 41.4314   | smart00034 | CLECT                               | -  | cl02432 | Class_B |
| GSLYST00005707001 | specific     | 153057 | 44   | 181  | 0.00339538  | 38.755    | cl00037    | CLECT                               | -  | cl02432 | Class_B |
| GSLYST00005707001 | superfamily  | 321932 | 41   | 179  | 0.000361987 | 41.4314   | cl02432    | CLECT superfamily                   | -  | -       | Class_B |
| GSLYST00005707001 | specific     | 307782 | 919  | 962  | 2.43E-15    | 70.8586   | pfam01825  | GPS                                 | -  | cl02559 | Class_B |
| GSLYST00005707001 | specific     | 197639 | 918  | 963  | 2.20E-09    | 53.9306   | smart00303 | GPS                                 | -  | cl02559 | Class_B |
| GSLYST00005707001 | superfamily  | 321989 | 919  | 962  | 2.43E-15    | 70.8586   | cl02559    | GPS superfamily                     | -  | -       | Class_B |
| GSLYST00005709001 | non-specific | 306508 | 2    | 225  | 2.00E-25    | 99.6331   | pfam00002  | 7tm_2                               | -  | cl21561 | Class_B |
| GSLYST00005709001 | superfamily  | 328797 | 2    | 225  | 2.00E-25    | 99.6331   | cl21561    | 7tm_4 superfamily                   | -  | -       | Class_B |
| GSLYST00005709001 | superfamily  | 333717 | 1    | 240  | 4.16E-81    | 242.864   | cl28897    | 7tm_GPCRs superfamily               | -  | -       | Class_B |
| GSLYST00005709001 | specific     | 320168 | 1    | 240  | 4.16E-81    | 242.864   | cl215040   | 7tmB2_Adhesion                      | -  | cl28897 | Class_B |
| GSLYST00005710001 | non-specific | 306508 | 2    | 236  | 1.22E-33    | 123.515   | pfam00002  | 7tm_2                               | -  | cl21561 | Class_B |
| GSLYST00005710001 | superfamily  | 328797 | 2    | 236  | 1.22E-33    | 123.515   | cl21561    | 7tm_4 superfamily                   | -  | -       | Class_B |
| GSLYST00005710001 | superfamily  | 333717 | 1    | 251  | 1.46E-90    | 270.213   | cl28897    | 7tm_GPCRs superfamily               | -  | -       | Class_B |
| GSLYST00005710001 | specific     | 320168 | 1    | 251  | 1.46E-90    | 270.213   | cl215040   | 7tmB2_Adhesion                      | -  | cl28897 | Class_B |
| GSLYST00005851001 | non-specific | 306508 | 119  | 360  | 1.39E-56    | 187.459   | pfam00002  | 7tm_2                               | -  | cl21561 | Class_B |
| GSLYST00005851001 | superfamily  | 328797 | 119  | 360  | 1.39E-56    | 187.459   | cl21561    | 7tm_4 superfamily                   | -  | -       | Class_B |
| GSLYST00005851001 | superfamily  | 333717 | 118  | 380  | 4.00E-110   | 326.152   | cl28897    | 7tm_GPCRs superfamily               | -  | -       | Class_B |
| GSLYST00005851001 | non-specific | 320388 | 118  | 380  | 4.00E-110   | 326.152   | cl215260   | 7tmB1_NPR_B4_insect-like            | -  | cl28897 | Class_B |
| GSLYST00005851001 | specific     | 214468 | 36   | 99   | 1.81E-11    | 59.4504   | smart00008 | HormR                               | -  | cl02422 | Class_B |
| GSLYST00005851001 | specific     | 308439 | 37   | 102  | 6.71E-14    | 65.8733   | pfam02793  | HRM                                 | -  | cl02422 | Class_B |
| GSLYST00005851001 | superfamily  | 321928 | 37   | 102  | 6.71E-14    | 65.8733   | cl02422    | HRM superfamily                     | -  | -       | Class_B |
| GSLYST00006197001 | non-specific | 306508 | 70   | 258  | 1.47E-26    | 103.1     | pfam00002  | 7tm_2                               | C  | cl21561 | Class_B |
| GSLYST00006197001 | superfamily  | 328797 | 70   | 258  | 1.47E-26    | 103.1     | cl21561    | 7tm_4 superfamily                   | C  | -       | Class_B |
| GSLYST00006197001 | superfamily  | 333717 | 76   | 258  | 2.11E-33    | 121.281   | cl28897    | 7tm_GPCRs superfamily               | C  | -       | Class_B |
| GSLYST00006197001 | non-specific | 320599 | 76   | 258  | 2.11E-33    | 121.281   | cl215933   | 7tmB2_GPR133-like_Adhesion_V        | C  | cl28897 | Class_B |
| GSLYST00006197001 | non-specific | 197639 | 32   | 61   | 2.49E-06    | 43.5302   | smart00303 | GPS                                 | N  | cl02559 | Class_B |
| GSLYST00006197001 | specific     | 307782 | 32   | 60   | 0.00239033  | 35.0351   | pfam01825  | GPS                                 | N  | cl02559 | Class_B |
| GSLYST00006197001 | superfamily  | 321989 | 32   | 61   | 2.49E-06    | 43.5302   | cl02559    | GPS superfamily                     | N  | -       | Class_B |
| GSLYST00006198001 | superfamily  | 333717 | 1    | 60   | 1.63E-14    | 65.0416   | cl28897    | 7tm_GPCRs superfamily               | N  | -       | Class_B |
| GSLYST00006198001 | non-specific | 320599 | 1    | 60   | 1.63E-14    | 65.0416   | cl215933   | 7tmB2_GPR133-like_Adhesion_V        | N  | cl28897 | Class_B |
| GSLYST00006940001 | non-specific | 306508 | 299  | 540  | 4.19E-24    | 101.174   | pfam00002  | 7tm_2                               | -  | cl21561 | Class_B |
| GSLYST00006940001 | superfamily  | 328797 | 299  | 540  | 4.19E-24    | 101.174   | cl21561    | 7tm_4 superfamily                   | -  | -       | Class_B |
| GSLYST00006940001 | superfamily  | 333717 | 298  | 555  | 9.31E-77    | 243.285   | cl28897    | 7tm_GPCRs superfamily               | -  | -       | Class_B |
| GSLYST00006940001 | specific     | 320167 | 298  | 555  | 9.31E-77    | 243.285   | cl215039   | 7tmB3_Methuselah-like               | -  | cl28897 | Class_B |
| GSLYST00007655001 | non-specific | 306508 | 64   | 301  | 5.55E-43    | 147.783   | pfam00002  | 7tm_2                               | -  | cl21561 | Class_B |
| GSLYST00007655001 | superfamily  | 328797 | 64   | 301  | 5.55E-43    | 147.783   | cl21561    | 7tm_4 superfamily                   | -  | -       | Class_B |
| GSLYST00007655001 | superfamily  | 333717 | 67   | 312  | 1.17E-86    | 261.004   | cl28897    | 7tm_GPCRs superfamily               | -  | -       | Class_B |
| GSLYST00007655001 | specific     | 320169 | 67   | 312  | 1.17E-86    | 261.004   | cl215041   | 7tmB1_hormone_R                     | -  | cl28897 | Class_B |
| GSLYST00007655001 | specific     | 214468 | 2    | 65   | 1.68E-11    | 58.68     | smart00008 | HormR                               | -  | cl02422 | Class_B |
| GSLYST00007655001 | specific     | 308439 | 2    | 63   | 5.73E-14    | 65.4881   | pfam02793  | HRM                                 | -  | cl02422 | Class_B |
| GSLYST00007655001 | superfamily  | 321928 | 2    | 63   | 5.73E-14    | 65.4881   | cl02422    | HRM superfamily                     | -  | -       | Class_B |
| GSLYST00008178001 | superfamily  | 333717 | 2    | 154  | 7.19E-12    | 61.086    | cl28897    | 7tm_GPCRs superfamily               | N  | -       | Class_B |
| GSLYST00008178001 | non-specific | 320167 | 2    | 154  | 7.19E-12    | 61.086    | cl215039   | 7tmB3_Methuselah-like               | N  | cl28897 | Class_B |
| GSLYST00008179001 | non-specific | 320167 | 1    | 181  | 1.40E-27    | 104.614   | cl215039   | 7tmB3_Methuselah-like               | N  | cl28897 | Class_B |
| GSLYST00008179001 | superfamily  | 333717 | 1    | 181  | 1.40E-27    | 104.614   | cl28897    | 7tm_GPCRs superfamily               | N  | -       | Class_B |
| GSLYST00008902001 | non-specific | 306508 | 1365 | 1599 | 4.22E-53    | 186.688   | pfam00002  | 7tm_2                               | -  | cl21561 | Class_B |
| GSLYST00008902001 | superfamily  | 328797 | 1365 | 1599 | 4.22E-53    | 186.688   | cl21561    | 7tm_4 superfamily                   | -  | -       | Class_B |
| GSLYST00008902001 | superfamily  | 333717 | 1364 | 1612 | 5.26E-83    | 272.91    | cl28897    | 7tm_GPCRs superfamily               | -  | -       | Class_B |
| GSLYST00008902001 | specific     | 320168 | 1364 | 1612 | 5.26E-83    | 272.91    | cl215040   | 7tmB2_Adhesion                      | -  | cl28897 | Class_B |
| GSLYST00008902001 | non-specific | 214520 | 664  | 728  | 0.000107224 | 42.3367   | smart00112 | CA                                  | -  | cl09101 | Class_B |
| GSLYST00008902001 | superfamily  | 333701 | 642  | 730  | 2.69E-10    | 58.8641   | cl28881    | CA_like superfamily                 | -  | -       | Class_B |
| GSLYST00008902001 | non-specific | 278457 | 642  | 728  | 2.17E-08    | 53.073    | pfam00028  | Cadherin                            | -  | cl09101 | Class_B |
| GSLYST00008902001 | specific     | 206637 | 642  | 730  | 2.69E-10    | 58.8641   | cl211304   | Cadherin_repeat                     | -  | cl28881 | Class_B |
| GSLYST00008902001 | superfamily  | 324323 | 642  | 728  | 2.17E-08    | 53.073    | cl09101    | E_set superfamily                   | -  | -       | Class_B |
| GSLYST00008902001 | specific     | 306513 | 153  | 179  | 0.00512071  | 36.2067   | pfam00008  | EGF                                 | -  | cl21504 | Class_B |
| GSLYST00008902001 | specific     | 238011 | 146  | 180  | 3.25E-07    | 48.0166   | cd00054    | EGF_CA                              | -  | cl21504 | Class_B |
| GSLYST00008902001 | specific     | 214542 | 146  | 180  | 1.19E-05    | 43.7748   | smart00179 | EGF_CA                              | -  | cl21504 | Class_B |
| GSLYST00008902001 | superfamily  | 328759 | 146  | 180  | 3.25E-07    | 48.0166   | cl21504    | EGF_CA superfamily                  | -  | -       | Class_B |
| GSLYST00008902001 | non-specific | 318649 | 1098 | 1283 | 1.74E-07    | 53.3947   | pfam16489  | GAIN                                | -  | cl24904 | Class_B |
| GSLYST00008902001 | superfamily  | 318649 | 1098 | 1283 | 1.74E-07    | 53.3947   | cl24904    | GAIN superfamily                    | -  | -       | Class_B |
| GSLYST00008902001 | specific     | 307782 | 1309 | 1354 | 8.99E-12    | 61.2287   | pfam01825  | GPS                                 | -  | cl02559 | Class_B |
| GSLYST00008902001 | specific     | 197639 | 1307 | 1355 | 1.55E-10    | 57.7826   | smart00303 | GPS                                 | -  | cl02559 | Class_B |
| GSLYST00008902001 | superfamily  | 321989 | 1309 | 1354 | 8.99E-12    | 61.2287   | cl02559    | GPS superfamily                     | -  | -       | Class_B |
| GSLYST00009392001 | specific     | 306508 | 741  | 978  | 3.52E-64    | 217.119   | pfam00002  | 7tm_2                               | -  | cl21561 | Class_B |
| GSLYST00009392001 | superfamily  | 328797 | 741  | 978  | 3.52E-64    | 217.119   | cl21561    | 7tm_4 superfamily                   | -  | -       | Class_B |
| GSLYST00009392001 | superfamily  | 333717 | 740  | 998  | 1.46E-128   | 390.47    | cl28897    | 7tm_GPCRs superfamily               | -  | -       | Class_B |
| GSLYST00009392001 | specific     | 320556 | 740  | 998  | 1.46E-128   | 390.47    | cl215440   | 7tmB2_latrophilin-like_invertebrate | -  | cl28897 | Class_B |
| GSLYST00009392001 | non-specific | 318649 | 447  | 597  | 1.33E-18    | 84.9811   | pfam16489  | GAIN                                | -  | cl24904 | Class_B |
| GSLYST00009392001 | superfamily  | 318649 | 447  | 597  | 1.33E-18    | 84.9811   | cl24904    | GAIN superfamily                    | -  | -       | Class_B |
| GSLYST00009392001 | specific     | 307782 | 678  | 722  | 4.45E-15    | 69.703    | pfam01825  | GPS                                 | -  | cl02559 | Class_B |
| GSLYST00009392001 | specific     | 197639 | 678  | 727  | 4.36E-13    | 64.331    | smart00303 | GPS                                 | -  | cl02559 | Class_B |
| GSLYST00009392001 | superfamily  | 321989 | 678  | 722  | 4.45E-15    | 69.703    | cl02559    | GPS superfamily                     | -  | -       | Class_B |
| GSLYST00009392001 | non-specific | 214468 | 340  | 392  | 0.00147713  | 37.8793   | smart00008 | HormR                               | -  | cl02422 | Class_B |
| GSLYST00009392001 | non-specific | 308439 | 340  | 392  | 0.00252348  | 36.9834   | pfam02793  | HRM                                 | -  | cl02422 | Class_B |
| GSLYST00009392001 | superfamily  | 321928 | 340  | 392  | 0.00147713  | 37.8793   | cl02422    | HRM superfamily                     | -  | -       | Class_B |
| GSLYST00009392001 | non-specific | 223885 | 803  | 981  | 0.000535411 | 43.5525   | COG0815    | Lnt                                 | C  | cl25421 | Class_B |
| GSLYST00009392001 | superfamily  | 330242 | 803  | 981  | 0.000535411 | 43.5525   | cl25421    | Lnt superfamily                     | C  | -       | Class_B |
| GSLYST00009392001 | superfamily  | 330571 | 68   | 201  | 0.000304165 | 43.773    | cl25750    | DamX superfamily                    | NC | -       | Class_B |
| GSLYST00009392001 | non-specific | 236792 | 68   | 201  | 0.000304165 | 43.773    | PRK10905   | PRK10905                            | NC | cl25750 | Class_B |
| GSLYST00009674001 | non-specific | 306508 | 1    | 150  | 3.16E-18    | 78.8323   | pfam00002  | 7tm_2                               | N  | cl21561 | Class_B |
| GSLYST00009674001 | superfamily  | 328797 | 1    | 150  | 3.16E-18    | 78.8323</ |            |                                     |    |         |         |

|                   |              |        |      |      |             |         |            |                                     |    |         |         |
|-------------------|--------------|--------|------|------|-------------|---------|------------|-------------------------------------|----|---------|---------|
| GSLYST00011530001 | specific     | 214542 | 171  | 207  | 2.93E-06    | 45.3156 | smart00179 | EGF_CA                              | -  | cl21504 | Class_B |
| GSLYST00011530001 | specific     | 238011 | 462  | 493  | 0.00411893  | 36.0754 | cd00054    | EGF_CA                              | -  | cl21504 | Class_B |
| GSLYST00011530001 | superfamily  | 328759 | 172  | 207  | 4.15E-08    | 50.3278 | cl21504    | EGF_CA superfamily                  | -  | -       | Class_B |
| GSLYST00011530001 | superfamily  | 328759 | 462  | 492  | 0.000396987 | 38.9031 | cl21504    | EGF_CA superfamily                  | -  | -       | Class_B |
| GSLYST00011530001 | non-specific | 318649 | 853  | 1064 | 2.68E-15    | 76.1215 | pfam16489  | GAIN                                | -  | cl24904 | Class_B |
| GSLYST00011530001 | superfamily  | 318649 | 853  | 1064 | 2.68E-15    | 76.1215 | cl24904    | GAIN superfamily                    | -  | -       | Class_B |
| GSLYST00011530001 | non-specific | 197639 | 1092 | 1153 | 8.90E-06    | 44.3006 | smart00303 | GPS                                 | -  | cl02559 | Class_B |
| GSLYST00011530001 | specific     | 307782 | 1096 | 1150 | 7.58E-05    | 41.5835 | pfam01825  | GPS                                 | -  | cl02559 | Class_B |
| GSLYST00011530001 | superfamily  | 321989 | 1092 | 1153 | 8.90E-06    | 44.3006 | cl02559    | GPS superfamily                     | -  | -       | Class_B |
| GSLYST00011530001 | specific     | 238058 | 259  | 436  | 6.01E-25    | 102.111 | cd00110    | LamG                                | -  | cl22861 | Class_B |
| GSLYST00011530001 | specific     | 214598 | 278  | 438  | 1.79E-20    | 88.5505 | smart00282 | LamG                                | -  | cl22861 | Class_B |
| GSLYST00011530001 | specific     | 238058 | 509  | 642  | 3.18E-14    | 71.2952 | cd00110    | LamG                                | -  | cl22861 | Class_B |
| GSLYST00011530001 | specific     | 214598 | 527  | 644  | 3.07E-11    | 62.3569 | smart00282 | LamG                                | -  | cl22861 | Class_B |
| GSLYST00011530001 | superfamily  | 328935 | 259  | 436  | 6.01E-25    | 102.111 | cl22861    | LamG superfamily                    | -  | -       | Class_B |
| GSLYST00011530001 | superfamily  | 328935 | 509  | 642  | 3.18E-14    | 71.2952 | cl22861    | LamG superfamily                    | -  | -       | Class_B |
| GSLYST00011530001 | specific     | 308045 | 283  | 438  | 5.89E-21    | 89.8007 | pfam02210  | Laminin_G_2                         | -  | cl22861 | Class_B |
| GSLYST00011530001 | specific     | 308045 | 527  | 644  | 1.49E-12    | 65.9183 | pfam02210  | Laminin_G_2                         | -  | cl22861 | Class_B |
| GSLYST00012075001 | non-specific | 306508 | 1    | 237  | 4.19E-56    | 182.066 | pfam00002  | 7tm_2                               | -  | cl21561 | Class_B |
| GSLYST00012075001 | superfamily  | 328797 | 1    | 237  | 4.19E-56    | 182.066 | cl21561    | 7tm_4 superfamily                   | -  | -       | Class_B |
| GSLYST00012075001 | superfamily  | 333717 | 1    | 257  | 1.39E-103   | 304.34  | cl28897    | 7tm_GPCRs superfamily               | -  | -       | Class_B |
| GSLYST00012075001 | non-specific | 320392 | 1    | 257  | 1.39E-103   | 304.34  | cd15264    | 7tmB1_CRF-R                         | -  | cl28897 | Class_B |
| GSLYST00012348001 | non-specific | 306508 | 1059 | 1312 | 1.01E-58    | 202.481 | pfam00002  | 7tm_2                               | -  | cl21561 | Class_B |
| GSLYST00012348001 | superfamily  | 328797 | 1059 | 1312 | 1.01E-58    | 202.481 | cl21561    | 7tm_4 superfamily                   | -  | -       | Class_B |
| GSLYST00012348001 | superfamily  | 333717 | 1058 | 1327 | 7.33E-113   | 356.498 | cl28897    | 7tm_GPCRs superfamily               | -  | -       | Class_B |
| GSLYST00012348001 | specific     | 320168 | 1058 | 1327 | 7.33E-113   | 356.498 | cd15040    | 7tmB2_Adhesion                      | -  | cl28897 | Class_B |
| GSLYST00012348001 | specific     | 307782 | 997  | 1041 | 1.49E-14    | 68.9326 | pfam01825  | GPS                                 | -  | cl02559 | Class_B |
| GSLYST00012348001 | specific     | 197639 | 995  | 1045 | 5.10E-14    | 67.4126 | smart00303 | GPS                                 | -  | cl02559 | Class_B |
| GSLYST00012348001 | superfamily  | 321989 | 997  | 1041 | 1.49E-14    | 68.9326 | cl02559    | GPS superfamily                     | -  | -       | Class_B |
| GSLYST00012348001 | specific     | 316378 | 89   | 147  | 3.65E-12    | 62.5446 | pfam13855  | LRR_8                               | -  | cl25992 | Class_B |
| GSLYST00012348001 | specific     | 316378 | 136  | 199  | 0.000636353 | 39.0475 | pfam13855  | LRR_8                               | -  | cl25992 | Class_B |
| GSLYST00012348001 | superfamily  | 330813 | 89   | 147  | 3.65E-12    | 62.5446 | cl25992    | LRR_8 superfamily                   | -  | -       | Class_B |
| GSLYST00012348001 | superfamily  | 330813 | 136  | 199  | 0.000636353 | 39.0475 | cl25992    | LRR_8 superfamily                   | -  | -       | Class_B |
| GSLYST00012348001 | specific     | 272723 | 67   | 303  | 7.72E-06    | 49.9666 | COG4886    | LRR                                 | N  | cl25992 | Class_B |
| GSLYST00012348001 | non-specific | 238064 | 66   | 200  | 8.17E-05    | 46.1946 | cd00116    | LRR_RI                              | N  | cl26161 | Class_B |
| GSLYST00012348001 | superfamily  | 330982 | 66   | 200  | 8.17E-05    | 46.1946 | cl26161    | LRR_RI superfamily                  | N  | -       | Class_B |
| GSLYST00012348001 | superfamily  | 330317 | 601  | 691  | 0.000294229 | 44.4437 | cl25496    | Herpes_BLLF1 superfamily            | NC | -       | Class_B |
| GSLYST00012348001 | non-specific | 319112 | 601  | 691  | 0.000294229 | 44.4437 | pfam17061  | PARM                                | NC | cl25496 | Class_B |
| GSLYST00012405001 | non-specific | 306508 | 592  | 822  | 1.34E-43    | 158.183 | pfam00002  | 7tm_2                               | -  | cl21561 | Class_B |
| GSLYST00012405001 | superfamily  | 328797 | 592  | 822  | 1.34E-43    | 158.183 | cl21561    | 7tm_4 superfamily                   | -  | -       | Class_B |
| GSLYST00012405001 | superfamily  | 333717 | 590  | 836  | 3.75E-61    | 207.811 | cl28897    | 7tm_GPCRs superfamily               | -  | -       | Class_B |
| GSLYST00012405001 | specific     | 320168 | 590  | 836  | 3.75E-61    | 207.811 | cd15040    | 7tmB2_Adhesion                      | -  | cl28897 | Class_B |
| GSLYST00012405001 | specific     | 306538 | 25   | 106  | 8.96E-07    | 47.4097 | pfam00041  | fn3                                 | -  | cl21522 | Class_B |
| GSLYST00012405001 | specific     | 214495 | 25   | 103  | 1.68E-05    | 43.7573 | smart00060 | FN3                                 | -  | cl21522 | Class_B |
| GSLYST00012405001 | specific     | 238020 | 25   | 103  | 0.000411445 | 40.1723 | cd00063    | FN3                                 | -  | cl21522 | Class_B |
| GSLYST00012405001 | superfamily  | 328772 | 25   | 106  | 8.96E-07    | 47.4097 | cl21522    | FN3 superfamily                     | -  | -       | Class_B |
| GSLYST00012405001 | specific     | 307782 | 536  | 578  | 4.62E-09    | 52.7543 | pfam01825  | GPS                                 | -  | cl02559 | Class_B |
| GSLYST00012405001 | non-specific | 197639 | 538  | 579  | 4.22E-08    | 50.0786 | smart00303 | GPS                                 | -  | cl02559 | Class_B |
| GSLYST00012405001 | superfamily  | 321989 | 536  | 578  | 4.62E-09    | 52.7543 | cl02559    | GPS superfamily                     | -  | -       | Class_B |
| GSLYST00012405001 | non-specific | 308439 | 245  | 297  | 0.00940083  | 35.4426 | pfam02793  | HRM                                 | -  | cl02422 | Class_B |
| GSLYST00012405001 | superfamily  | 321928 | 245  | 297  | 0.00940083  | 35.4426 | cl02422    | HRM superfamily                     | -  | -       | Class_B |
| GSLYST00012592001 | non-specific | 306508 | 668  | 902  | 2.56E-15    | 76.5211 | pfam00002  | 7tm_2                               | -  | cl21561 | Class_B |
| GSLYST00012592001 | superfamily  | 328797 | 668  | 902  | 2.56E-15    | 76.5211 | cl21561    | 7tm_4 superfamily                   | -  | -       | Class_B |
| GSLYST00012592001 | superfamily  | 333717 | 668  | 916  | 1.15E-54    | 190.898 | cl28897    | 7tm_GPCRs superfamily               | -  | -       | Class_B |
| GSLYST00012592001 | specific     | 320167 | 668  | 916  | 1.15E-54    | 190.898 | cd15039    | 7tmB3_Methuselah-like               | -  | cl28897 | Class_B |
| GSLYST00012609001 | non-specific | 306508 | 28   | 187  | 1.18E-43    | 145.087 | pfam00002  | 7tm_2                               | C  | cl21561 | Class_B |
| GSLYST00012609001 | superfamily  | 328797 | 28   | 187  | 1.18E-43    | 145.087 | cl21561    | 7tm_4 superfamily                   | C  | -       | Class_B |
| GSLYST00012609001 | superfamily  | 333717 | 27   | 189  | 1.04E-58    | 184.003 | cl28897    | 7tm_GPCRs superfamily               | C  | -       | Class_B |
| GSLYST00012609001 | non-specific | 320556 | 27   | 189  | 1.04E-58    | 184.003 | cd15440    | 7tmB2_latrophilin-like_invertebrate | C  | cl28897 | Class_B |
| GSLYST00012609001 | specific     | 307782 | 3    | 14   | 0.00200697  | 34.6499 | pfam01825  | GPS                                 | N  | cl02559 | Class_B |
| GSLYST00012609001 | non-specific | 197639 | 3    | 19   | 0.00355038  | 33.9002 | smart00303 | GPS                                 | N  | cl02559 | Class_B |
| GSLYST00012609001 | superfamily  | 321989 | 3    | 14   | 0.00200697  | 34.6499 | cl02559    | GPS superfamily                     | N  | -       | Class_B |
| GSLYST00012813001 | non-specific | 306508 | 122  | 361  | 1.78E-41    | 147.398 | pfam00002  | 7tm_2                               | -  | cl21561 | Class_B |
| GSLYST00012813001 | superfamily  | 328797 | 122  | 361  | 1.78E-41    | 147.398 | cl21561    | 7tm_4 superfamily                   | -  | -       | Class_B |
| GSLYST00012813001 | superfamily  | 333717 | 117  | 382  | 2.85E-93    | 282.624 | cl28897    | 7tm_GPCRs superfamily               | -  | -       | Class_B |
| GSLYST00012813001 | non-specific | 320388 | 117  | 382  | 2.85E-93    | 282.624 | cd15260    | 7tmB1_NPR_B4_insect-like            | -  | cl28897 | Class_B |
| GSLYST00012813001 | specific     | 214468 | 45   | 111  | 1.88E-15    | 70.6212 | smart00008 | HRM                                 | -  | cl02422 | Class_B |
| GSLYST00012813001 | specific     | 308439 | 45   | 111  | 4.71E-17    | 74.7329 | pfam02793  | HRM                                 | -  | cl02422 | Class_B |
| GSLYST00012813001 | superfamily  | 321928 | 45   | 111  | 4.71E-17    | 74.7329 | cl02422    | HRM superfamily                     | -  | -       | Class_B |
| GSLYST00012996001 | non-specific | 306508 | 651  | 886  | 5.23E-26    | 107.337 | pfam00002  | 7tm_2                               | -  | cl21561 | Class_B |
| GSLYST00012996001 | superfamily  | 328797 | 651  | 886  | 5.23E-26    | 107.337 | cl21561    | 7tm_4 superfamily                   | -  | -       | Class_B |
| GSLYST00012996001 | superfamily  | 333717 | 648  | 901  | 5.82E-75    | 245.946 | cl28897    | 7tm_GPCRs superfamily               | -  | -       | Class_B |
| GSLYST00012996001 | specific     | 320168 | 648  | 901  | 5.82E-75    | 245.946 | cd15040    | 7tmB2_Adhesion                      | -  | cl28897 | Class_B |
| GSLYST00012996001 | specific     | 307782 | 591  | 634  | 5.25E-14    | 66.6214 | pfam01825  | GPS                                 | -  | cl02559 | Class_B |
| GSLYST00012996001 | non-specific | 197639 | 590  | 634  | 5.85E-07    | 46.6118 | smart00303 | GPS                                 | -  | cl02559 | Class_B |
| GSLYST00012996001 | superfamily  | 321989 | 591  | 634  | 5.25E-14    | 66.6214 | cl02559    | GPS superfamily                     | -  | -       | Class_B |
| GSLYST00012997001 | superfamily  | 333717 | 1    | 208  | 7.12E-70    | 213.589 | cl28897    | 7tm_GPCRs superfamily               | -  | -       | Class_B |
| GSLYST00012997001 | specific     | 320168 | 1    | 208  | 7.12E-70    | 213.589 | cd15040    | 7tmB2_Adhesion                      | -  | cl28897 | Class_B |
| GSLYST00012997001 | non-specific | 306508 | 12   | 193  | 4.56E-25    | 98.0923 | pfam00002  | 7tm_2                               | N  | cl21561 | Class_B |
| GSLYST00012997001 | superfamily  | 328797 | 12   | 193  | 4.56E-25    | 98.0923 | cl21561    | 7tm_4 superfamily                   | N  | -       | Class_B |
| GSLYST00013103001 | non-specific | 306508 | 705  | 941  | 3.88E-41    | 151.25  | pfam00002  | 7tm_2                               | -  | cl21561 | Class_B |
| GSLYST00013103001 | superfamily  | 328797 | 705  | 941  | 3.88E-41    | 151.25  | cl21561    | 7tm_4 superfamily                   | -  | -       | Class_B |
| GSLYST00013103001 | superfamily  | 333717 | 703  | 956  | 1.58E-101   | 318.363 | cl28897    | 7tm_GPCRs superfamily               | -  | -       | Class_B |
| GSLYST00013103001 | specific     | 320168 | 703  | 956  | 1.58E-101   | 318.363 | cd15040    | 7tmB2_Adhesion                      | -  | cl28897 | Class_B |
| GSLYST00013103001 | specific     | 307782 | 646  | 688  | 2.07E-13    | 65.0806 | pfam01825  | GPS                                 | -  | cl02559 | Class_B |
| GSLYST00013103001 | specific     | 197639 | 643  | 690  | 1.92E-10    | 56.627  | smart00303 | GPS                                 | -  | cl02559 | Class_B |
| GSLYST00013103001 | superfamily  | 321989 | 646  | 688  | 2.07E-13    | 65.0806 | cl02559    | GPS superfamily                     | -  | -       | Class_B |
| GSLYST00014513001 | specific     | 306508 | 166  | 429  | 6.73E-83    | 258.335 | pfam00002  | 7tm_2                               | -  | cl21561 | Class_B |
| GSLYST00014513001 | superfamily  | 328797 | 166  | 429  | 6.73E-83    | 258.335 | cl21561    | 7tm_4 superfamily                   | -  | -       | Class_B |
| GSLYST00014513001 | superfamily  | 333717 | 166  | 450  | 1.09E-160   | 459.162 | cl28897    | 7tm_GPCRs superfamily               | -  | -       | Class_B |
| GSLYST00014513001 | specific     | 320400 | 166  | 450  | 1.09E-160   | 459.162 | cd15272    | 7tmB1_PTH-R_related                 | -  | cl28897 | Class_B |
| GSLYST00014513001 | specific     | 214468 | 84   | 146  | 1.93E-19    | 82.1772 | smart00008 | HRM                                 | -  | cl02422 | Class_B |
| GSLYST00014513001 | specific     | 308439 | 84   | 146  | 6.60E-21    | 86.2889 | pfam02793  | HRM                                 | -  | cl02422 | Class_B |
| GSLYST00014513001 | superfamily  | 321928 | 84   | 146  | 6.60E-21    | 86.2889 | cl02422    | HRM superfamily                     | -  | -       | Class_B |
| GSLYST00014738001 | non-specific | 306508 | 1043 | 1279 | 1.74E-45    | 164.347 | pfam00002  | 7tm_2                               | -  | cl21561 | Class_B |
| GSLYST00014738001 | superfamily  | 328797 | 1043 | 1279 | 1.74E-45    | 164.347 | cl21561    | 7tm_4 superfamily                   | -  | -       | Class_B |
| GSLYST00014738001 | specific     | 320090 | 1042 | 1292 | 5.85E-71    | 237.856 | cl213952   | 7tm_classB                          | -  | cl28897 | Class_B |
| GSLYST00014738001 | superfamily  | 333717 | 1042 | 1292 | 5.85E-71    | 237.856 | cl28897    | 7tm_GPCRs superfamily               | -  | -       | Class_B |
| GSLYST00014738001 | superfamily  | 333701 | 489  | 578  | 0.000846805 | 39.9894 | cl28881    | CA_like superfamily                 | -  | -       | Class_B |
| GSLYST00014738001 | specific     | 206637 | 489  | 578  | 0.000846805 | 39.9894 | cd11304    | Cadherin_repeat                     | -  | cl28881 | Class_B |
| GSLYST00014738001 | specific     | 197639 | 988  | 1036 | 6.68E-11    | 58.553  | smart00303 | GPS</                               |    |         |         |

|                   |              |        |      |      |             |         |            |                                     |   |   |         |
|-------------------|--------------|--------|------|------|-------------|---------|------------|-------------------------------------|---|---|---------|
| GSLYST00014739001 | superfamily  | 321989 | 469  | 512  | 1.11E-12    | 62.7694 | cl02559    | GPS superfamily                     | - | - | Class_B |
| GSLYST00014740001 | specific     | 306508 | 1919 | 2153 | 2.38E-63    | 216.349 | pfam00002  | 7tm_2                               | - | - | Class_B |
| GSLYST00014740001 | superfamily  | 328797 | 1919 | 2153 | 2.38E-63    | 216.349 | cl21561    | 7tm_4 superfamily                   | - | - | Class_B |
| GSLYST00014740001 | superfamily  | 333717 | 1918 | 2166 | 1.28E-92    | 300.644 | cl28897    | 7tm_GPCRs superfamily               | - | - | Class_B |
| GSLYST00014740001 | specific     | 320168 | 1918 | 2166 | 1.28E-92    | 300.644 | cd15040    | 7tmB2_Adhesion                      | - | - | Class_B |
| GSLYST00014740001 | specific     | 307643 | 2    | 40   | 0.000328206 | 40.0862 | pfam01607  | CBM_14                              | - | - | Class_B |
| GSLYST00014740001 | superfamily  | 322027 | 2    | 40   | 0.000154349 | 40.8902 | cl02629    | CBM_14 superfamily                  | - | - | Class_B |
| GSLYST00014740001 | specific     | 214696 | 2    | 40   | 0.000154349 | 40.8902 | smart00494 | ChtBD2                              | - | - | Class_B |
| GSLYST00014740001 | specific     | 306513 | 1183 | 1209 | 0.00303764  | 36.9771 | pfam00008  | EGF                                 | - | - | Class_B |
| GSLYST00014740001 | specific     | 306513 | 686  | 713  | 0.00511636  | 36.2067 | pfam00008  | EGF                                 | - | - | Class_B |
| GSLYST00014740001 | specific     | 238011 | 1175 | 1210 | 9.05E-10    | 55.3354 | cd00054    | EGF_CA                              | - | - | Class_B |
| GSLYST00014740001 | specific     | 238011 | 679  | 714  | 4.46E-09    | 53.4094 | cd00054    | EGF_CA                              | - | - | Class_B |
| GSLYST00014740001 | specific     | 214542 | 1175 | 1211 | 6.44E-09    | 53.0196 | smart00179 | EGF_CA                              | - | - | Class_B |
| GSLYST00014740001 | specific     | 214542 | 679  | 715  | 8.06E-09    | 53.0196 | smart00179 | EGF_CA                              | - | - | Class_B |
| GSLYST00014740001 | specific     | 238011 | 177  | 211  | 2.99E-05    | 42.6238 | cd00054    | EGF_CA                              | - | - | Class_B |
| GSLYST00014740001 | specific     | 214542 | 177  | 211  | 5.01E-05    | 42.234  | smart00179 | EGF_CA                              | - | - | Class_B |
| GSLYST00014740001 | superfamily  | 328759 | 1175 | 1210 | 9.05E-10    | 55.3354 | cl21504    | EGF_CA superfamily                  | - | - | Class_B |
| GSLYST00014740001 | superfamily  | 328759 | 679  | 714  | 4.46E-09    | 53.4094 | cl21504    | EGF_CA superfamily                  | - | - | Class_B |
| GSLYST00014740001 | superfamily  | 328759 | 177  | 211  | 2.99E-05    | 42.6238 | cl21504    | EGF_CA superfamily                  | - | - | Class_B |
| GSLYST00014740001 | non-specific | 318649 | 1654 | 1839 | 1.72E-06    | 50.6983 | pfam16489  | GAIN                                | - | - | Class_B |
| GSLYST00014740001 | superfamily  | 318649 | 1654 | 1839 | 1.72E-06    | 50.6983 | cl24904    | GAIN superfamily                    | - | - | Class_B |
| GSLYST00014740001 | specific     | 307782 | 1863 | 1908 | 1.30E-12    | 63.925  | pfam01825  | GPS                                 | - | - | Class_B |
| GSLYST00014740001 | specific     | 197639 | 1861 | 1911 | 4.91E-12    | 62.405  | smart00303 | GPS                                 | - | - | Class_B |
| GSLYST00014740001 | superfamily  | 321989 | 1863 | 1908 | 1.30E-12    | 63.925  | cl02559    | GPS superfamily                     | - | - | Class_B |
| GSLYST00014740001 | non-specific | 214468 | 1565 | 1618 | 1.70E-06    | 47.124  | smart00008 | HormR                               | - | - | Class_B |
| GSLYST00014740001 | superfamily  | 321928 | 1565 | 1618 | 1.70E-06    | 47.124  | cl02422    | HRM superfamily                     | - | - | Class_B |
| GSLYST00014740001 | non-specific | 224214 | 2007 | 2156 | 0.0096616   | 40.3729 | COG1295    | BrkB                                | N | - | Class_B |
| GSLYST00014740001 | specific     | 308439 | 1578 | 1618 | 0.000430361 | 40.4502 | pfam02793  | HRM                                 | N | - | Class_B |
| GSLYST00014740001 | superfamily  | 324181 | 2007 | 2156 | 0.0096616   | 40.3729 | cl07918    | Virul_fac_BrkB superfamily          | N | - | Class_B |
| GSLYST00014882001 | non-specific | 197639 | 129  | 190  | 1.49E-06    | 43.9154 | smart00303 | GPS                                 | - | - | Class_B |
| GSLYST00014882001 | specific     | 307782 | 133  | 187  | 2.20E-05    | 40.8131 | pfam01825  | GPS                                 | - | - | Class_B |
| GSLYST00014882001 | superfamily  | 321989 | 129  | 190  | 1.49E-06    | 43.9154 | cl02559    | GPS superfamily                     | - | - | Class_B |
| GSLYST00014882001 | superfamily  | 333717 | 229  | 258  | 0.000176686 | 41.4676 | cl28897    | 7tm_GPCRs superfamily               | C | - | Class_B |
| GSLYST00014882001 | non-specific | 320557 | 229  | 258  | 0.000176686 | 41.4676 | cd15441    | 7tmB2_CELSR_Adhesion_IV             | C | - | Class_B |
| GSLYST00014882001 | non-specific | 318649 | 1    | 101  | 4.06E-05    | 42.9943 | pfam16489  | GAIN                                | N | - | Class_B |
| GSLYST00014882001 | superfamily  | 318649 | 1    | 101  | 4.06E-05    | 42.9943 | cl24904    | GAIN superfamily                    | N | - | Class_B |
| GSLYST00015600001 | non-specific | 306508 | 1    | 246  | 4.09E-06    | 46.4755 | pfam00002  | 7tm_2                               | - | - | Class_B |
| GSLYST00015600001 | superfamily  | 328797 | 1    | 246  | 4.09E-06    | 46.4755 | cl21561    | 7tm_4 superfamily                   | - | - | Class_B |
| GSLYST00015600001 | superfamily  | 333717 | 1    | 261  | 6.91E-46    | 154.304 | cl28897    | 7tm_GPCRs superfamily               | - | - | Class_B |
| GSLYST00015600001 | specific     | 320167 | 1    | 261  | 6.91E-46    | 154.304 | cd15039    | 7tmB3_Methuselah-like               | - | - | Class_B |
| GSLYST00015912001 | non-specific | 306508 | 29   | 260  | 5.84E-24    | 97.7071 | pfam00002  | 7tm_2                               | - | - | Class_B |
| GSLYST00015912001 | superfamily  | 328797 | 29   | 260  | 5.84E-24    | 97.7071 | cl21561    | 7tm_4 superfamily                   | - | - | Class_B |
| GSLYST00015912001 | superfamily  | 333717 | 28   | 275  | 2.66E-52    | 172.512 | cl28897    | 7tm_GPCRs superfamily               | - | - | Class_B |
| GSLYST00015912001 | non-specific | 320599 | 28   | 275  | 2.66E-52    | 172.512 | cd15933    | 7tmB2_GPR133-like_Adhesion_V        | - | - | Class_B |
| GSLYST00016055001 | non-specific | 306508 | 1    | 104  | 2.21E-05    | 41.4679 | pfam00002  | 7tm_2                               | N | - | Class_B |
| GSLYST00016055001 | superfamily  | 328797 | 1    | 104  | 2.21E-05    | 41.4679 | cl21561    | 7tm_4 superfamily                   | N | - | Class_B |
| GSLYST00016055001 | superfamily  | 333717 | 1    | 106  | 1.05E-18    | 77.7532 | cl28897    | 7tm_GPCRs superfamily               | N | - | Class_B |
| GSLYST00016055001 | non-specific | 320599 | 1    | 106  | 1.05E-18    | 77.7532 | cd15933    | 7tmB2_GPR133-like_Adhesion_V        | N | - | Class_B |
| GSLYST00016055001 | non-specific | 306508 | 1    | 104  | 2.21E-05    | 41.4679 | pfam00002  | 7tm_2                               | N | - | Class_B |
| GSLYST00016055001 | superfamily  | 328797 | 1    | 104  | 2.21E-05    | 41.4679 | cl21561    | 7tm_4 superfamily                   | N | - | Class_B |
| GSLYST00016055001 | superfamily  | 333717 | 1    | 106  | 1.05E-18    | 77.7532 | cl28897    | 7tm_GPCRs superfamily               | N | - | Class_B |
| GSLYST00016055001 | non-specific | 320599 | 1    | 106  | 1.05E-18    | 77.7532 | cd15933    | 7tmB2_GPR133-like_Adhesion_V        | N | - | Class_B |
| GSLYST00016478001 | non-specific | 306508 | 300  | 412  | 0.00367517  | 38.3864 | pfam00002  | 7tm_2                               | C | - | Class_B |
| GSLYST00016478001 | superfamily  | 328797 | 300  | 412  | 0.00367517  | 38.3864 | cl21561    | 7tm_4 superfamily                   | C | - | Class_B |
| GSLYST00016478001 | superfamily  | 333717 | 296  | 406  | 2.42E-09    | 57.6569 | cl28897    | 7tm_GPCRs superfamily               | C | - | Class_B |
| GSLYST00016478001 | non-specific | 320654 | 296  | 406  | 2.42E-09    | 57.6569 | cd15988    | 7tmB2_BAI2                          | C | - | Class_B |
| GSLYST00016693001 | superfamily  | 333717 | 2    | 147  | 3.96E-22    | 88.4352 | cl28897    | 7tm_GPCRs superfamily               | C | - | Class_B |
| GSLYST00016693001 | non-specific | 320167 | 2    | 147  | 3.96E-22    | 88.4352 | cd15039    | 7tmB3_Methuselah-like               | C | - | Class_B |
| GSLYST00016827001 | non-specific | 306508 | 16   | 66   | 4.48E-06    | 44.9347 | pfam00002  | 7tm_2                               | N | - | Class_B |
| GSLYST00016827001 | superfamily  | 328797 | 16   | 66   | 4.48E-06    | 44.9347 | cl21561    | 7tm_4 superfamily                   | N | - | Class_B |
| GSLYST00016827001 | superfamily  | 333717 | 2    | 87   | 9.81E-30    | 109.62  | cl28897    | 7tm_GPCRs superfamily               | N | - | Class_B |
| GSLYST00016827001 | non-specific | 320169 | 2    | 87   | 9.81E-30    | 109.62  | cd15041    | 7tmB1_hormone_R                     | N | - | Class_B |
| GSLYST00018277001 | non-specific | 197639 | 40   | 101  | 2.34E-06    | 43.5302 | smart00303 | GPS                                 | - | - | Class_B |
| GSLYST00018277001 | specific     | 307782 | 44   | 98   | 2.06E-05    | 40.8131 | pfam01825  | GPS                                 | - | - | Class_B |
| GSLYST00018277001 | superfamily  | 321989 | 40   | 101  | 2.34E-06    | 43.5302 | cl02559    | GPS superfamily                     | - | - | Class_B |
| GSLYST00018277001 | non-specific | 306508 | 118  | 263  | 1.56E-29    | 111.189 | pfam00002  | 7tm_2                               | C | - | Class_B |
| GSLYST00018277001 | superfamily  | 328797 | 118  | 263  | 1.56E-29    | 111.189 | cl21561    | 7tm_4 superfamily                   | C | - | Class_B |
| GSLYST00018277001 | superfamily  | 333717 | 114  | 263  | 5.81E-62    | 195.162 | cl28897    | 7tm_GPCRs superfamily               | C | - | Class_B |
| GSLYST00018277001 | non-specific | 320557 | 114  | 263  | 5.81E-62    | 195.162 | cd15441    | 7tmB2_CELSR_Adhesion_IV             | C | - | Class_B |
| GSLYST00018774001 | non-specific | 306508 | 33   | 150  | 5.68E-14    | 67.2763 | pfam00002  | 7tm_2                               | N | - | Class_B |
| GSLYST00018774001 | superfamily  | 328797 | 33   | 150  | 5.68E-14    | 67.2763 | cl21561    | 7tm_4 superfamily                   | N | - | Class_B |
| GSLYST00018774001 | superfamily  | 333717 | 1    | 164  | 6.19E-32    | 114.732 | cl28897    | 7tm_GPCRs superfamily               | N | - | Class_B |
| GSLYST00018774001 | non-specific | 320599 | 1    | 164  | 6.19E-32    | 114.732 | cd15933    | 7tmB2_GPR133-like_Adhesion_V        | N | - | Class_B |
| GSLYST00020067001 | non-specific | 306508 | 225  | 486  | 3.18E-61    | 204.407 | pfam00002  | 7tm_2                               | - | - | Class_B |
| GSLYST00020067001 | superfamily  | 328797 | 225  | 486  | 3.18E-61    | 204.407 | cl21561    | 7tm_4 superfamily                   | - | - | Class_B |
| GSLYST00020067001 | superfamily  | 333717 | 226  | 510  | 3.15E-106   | 323.571 | cl28897    | 7tm_GPCRs superfamily               | - | - | Class_B |
| GSLYST00020067001 | non-specific | 320400 | 226  | 510  | 3.15E-106   | 323.571 | cl15272    | 7tmB1_PTH-R_related                 | - | - | Class_B |
| GSLYST00020067001 | specific     | 214468 | 144  | 213  | 2.91E-19    | 81.792  | smart00008 | HormR                               | - | - | Class_B |
| GSLYST00020067001 | superfamily  | 308439 | 144  | 213  | 5.68E-22    | 89.3705 | pfam02793  | HRM                                 | - | - | Class_B |
| GSLYST00020067001 | superfamily  | 321928 | 144  | 213  | 5.68E-22    | 89.3705 | cl02422    | HRM superfamily                     | - | - | Class_B |
| GSLYST00020718001 | non-specific | 306508 | 30   | 140  | 2.05E-14    | 67.2763 | pfam00002  | 7tm_2                               | C | - | Class_B |
| GSLYST00020718001 | superfamily  | 328797 | 30   | 140  | 2.05E-14    | 67.2763 | cl21561    | 7tm_4 superfamily                   | C | - | Class_B |
| GSLYST00020718001 | superfamily  | 333717 | 24   | 141  | 3.48E-34    | 120.02  | cl28897    | 7tm_GPCRs superfamily               | C | - | Class_B |
| GSLYST00020718001 | non-specific | 320169 | 24   | 141  | 3.48E-34    | 120.02  | cd15041    | 7tmB1_hormone_R                     | C | - | Class_B |
| GSLYST00020775001 | superfamily  | 333717 | 4    | 76   | 4.72E-10    | 55.7817 | cl28897    | 7tm_GPCRs superfamily               | N | - | Class_B |
| GSLYST00020775001 | non-specific | 320598 | 4    | 76   | 4.72E-10    | 55.7817 | cd15932    | 7tmB2_GPR116-like_Adhesion_VI       | N | - | Class_B |
| GSLYST00021398001 | non-specific | 306508 | 44   | 154  | 2.37E-13    | 64.9651 | pfam00002  | 7tm_2                               | C | - | Class_B |
| GSLYST00021398001 | superfamily  | 328797 | 44   | 154  | 2.37E-13    | 64.9651 | cl21561    | 7tm_4 superfamily                   | C | - | Class_B |
| GSLYST00021398001 | superfamily  | 333717 | 47   | 136  | 1.36E-17    | 76.5326 | cl28897    | 7tm_GPCRs superfamily               | C | - | Class_B |
| GSLYST00021398001 | non-specific | 320556 | 47   | 136  | 1.36E-17    | 76.5326 | cd15440    | 7tmB2_latrophilin-like_invertebrate | C | - | Class_B |
| GSLYST00021398001 | non-specific | 197639 | 6    | 35   | 0.00144507  | 34.6706 | smart00303 | GPS                                 | N | - | Class_B |
| GSLYST00021398001 | superfamily  | 321989 | 6    | 35   | 0.00144507  | 34.6706 | cl02559    | GPS superfamily                     | N | - | Class_B |
| GSLYST00021790001 | specific     | 306508 | 540  | 777  | 2.49E-69    | 232.142 | pfam00002  | 7tm_2                               | - | - | Class_B |
| GSLYST00021790001 | superfamily  | 328797 | 540  | 777  | 2.49E-69    | 232.142 | cl21561    | 7tm_4 superfamily                   | - | - | Class_B |
| GSLYST00021790001 | superfamily  | 333717 | 539  | 797  | 5.42E-137   | 415.893 | cl28897    | 7tm_GPCRs superfamily               | - | - | Class_B |
| GSLYST00021790001 | specific     | 320556 | 539  | 797  | 5.42E-137   | 415.893 | cd15440    | 7tmB2_latrophilin-like_invertebrate | - | - | Class_B |
| GSLYST00021790001 | specific     | 197639 | 482  | 529  | 1.68E-17    | 77.0426 | smart00303 | GPS                                 | - | - | Class_B |
| GSLYST00021790001 | specific     | 307782 | 482  | 526  | 2.46E-17    | 76.2514 | pfam01825  | GPS                                 | - | - | Class_B |
| GSLYST00021790001 | superfamily  | 321989 | 482  | 529  | 1.68E-17    | 77.0426 | cl02559    | GPS superfamily                     | - | - | Class_B |
| GSLYST00021790001 | specific     | 214468 | 156  | 215  | 2.18E-09    | 54.828  | smart00008 | HormR                               | - | - | Class_B |
| GSLYST00021790001 | specific     | 308439 | 156  | 209  | 0.000858505 | 38.5242 | pfam02793  | HRM                                 | - | - | Class_B |
| GSLYST00021790001 | non-specific | 321928 | 156  | 215  | 2.18E-09    | 54.828  | cl02422    | HRM superfamily                     | - | - | Class_B |
| GSLYST00021790001 |              |        |      |      |             |         |            |                                     |   |   |         |

|                   |              |        |      |      |             |         |           |                                                |    |         |         |
|-------------------|--------------|--------|------|------|-------------|---------|-----------|------------------------------------------------|----|---------|---------|
| GSLYST00022112001 | superfamily  | 328797 | 1    | 89   | 1.87E-13    | 62.6539 | cl21561   | 7tm_4 superfamily                              | NC | -       | Class_B |
| GSLYST00022112001 | superfamily  | 333717 | 1    | 89   | 2.92E-19    | 78.1384 | cl28897   | 7tm_GPCRs superfamily                          | NC | -       | Class_B |
| GSLYST00022112001 | non-specific | 320599 | 1    | 89   | 2.92E-19    | 78.1384 | cd15933   | 7tmB2_GPR133-like_Adhesion_V                   | NC | cl28897 | Class_B |
| GSLYST00022150001 | non-specific | 306508 | 1    | 67   | 6.16E-06    | 41.0828 | pfam00002 | 7tm_2                                          | NC | cl21561 | Class_B |
| GSLYST00022150001 | superfamily  | 328797 | 1    | 67   | 6.16E-06    | 41.0828 | cl21561   | 7tm_4 superfamily                              | NC | -       | Class_B |
| GSLYST00022150001 | superfamily  | 333717 | 1    | 66   | 1.01E-11    | 57.2726 | cl28897   | 7tm_GPCRs superfamily                          | NC | -       | Class_B |
| GSLYST00022150001 | non-specific | 320556 | 1    | 66   | 1.01E-11    | 57.2726 | cd15440   | 7tmB2_latrophilin-like_invertebrate            | NC | cl28897 | Class_B |
| GSLYST00000580001 | superfamily  | 333717 | 381  | 628  | 1.08E-87    | 275.631 | cl28897   | 7tm_GPCRs superfamily                          | -  | -       | Class_C |
| GSLYST00000580001 | specific     | 320420 | 381  | 628  | 1.08E-87    | 275.631 | cd15293   | 7tmC_GPR158-like                               | -  | cl28897 | Class_C |
| GSLYST00000580001 | specific     | 214542 | 270  | 321  | 0.00696773  | 34.53   | smar00179 | EGF_CA                                         | -  | cl21504 | Class_C |
| GSLYST00000580001 | non-specific | 311536 | 270  | 320  | 0.00541751  | 35.0211 | pfam07645 | EGF_CA                                         | C  | cl21504 | Class_C |
| GSLYST00000580001 | superfamily  | 328759 | 270  | 320  | 0.00541751  | 35.0211 | cl21504   | EGF_CA superfamily                             | C  | -       | Class_C |
| GSLYST00000580001 | specific     | 306509 | 540  | 624  | 1.52E-12    | 64.1209 | pfam00003 | 7tm_3                                          | N  | cl02802 | Class_C |
| GSLYST00000580001 | superfamily  | 306509 | 540  | 624  | 1.52E-12    | 64.1209 | cl02802   | 7tm_3 superfamily                              | N  | -       | Class_C |
| GSLYST00000807001 | specific     | 320091 | 383  | 625  | 2.61E-43    | 156.243 | cd13953   | 7tm_classC_mGluR-like                          | -  | cl28897 | Class_C |
| GSLYST00000807001 | superfamily  | 333717 | 383  | 625  | 2.61E-43    | 156.243 | cl28897   | 7tm_GPCRs superfamily                          | -  | -       | Class_C |
| GSLYST00000807001 | specific     | 306509 | 544  | 624  | 2.88E-12    | 63.3505 | pfam00003 | 7tm_3                                          | N  | cl02802 | Class_C |
| GSLYST00000807001 | superfamily  | 306509 | 544  | 624  | 2.88E-12    | 63.3505 | cl02802   | 7tm_3 superfamily                              | N  | -       | Class_C |
| GSLYST00000807001 | non-specific | 107370 | 119  | 267  | 2.52E-06    | 50.1527 | cd06375   | PBP1_mGluR_group1                              | N  | cl10011 | Class_C |
| GSLYST00000807001 | superfamily  | 324556 | 119  | 267  | 2.52E-06    | 50.1527 | cl10011   | Periplasmic_Binding_Protein_Type_1 superfamily | N  | -       | Class_C |
| GSLYST00000853001 | specific     | 306509 | 109  | 194  | 2.23E-16    | 73.3657 | pfam00003 | 7tm_3                                          | N  | cl02802 | Class_C |
| GSLYST00000853001 | superfamily  | 306509 | 109  | 194  | 2.23E-16    | 73.3657 | cl02802   | 7tm_3 superfamily                              | N  | -       | Class_C |
| GSLYST00000853001 | superfamily  | 333717 | 1    | 197  | 2.18E-93    | 277.557 | cl28897   | 7tm_GPCRs superfamily                          | N  | -       | Class_C |
| GSLYST00000853001 | specific     | 320420 | 1    | 197  | 2.18E-93    | 277.557 | cd15293   | 7tmC_GPR158-like                               | N  | cl28897 | Class_C |
| GSLYST00000854001 | superfamily  | 333717 | 125  | 155  | 0.000198054 | 39.8893 | cl28897   | 7tm_GPCRs superfamily                          | C  | -       | Class_C |
| GSLYST00000854001 | non-specific | 320420 | 125  | 155  | 0.000198054 | 39.8893 | cd15293   | 7tmC_GPR158-like                               | C  | cl28897 | Class_C |
| GSLYST00001391001 | superfamily  | 333717 | 1    | 53   | 4.86E-07    | 43.3178 | cl28897   | 7tm_GPCRs superfamily                          | N  | -       | Class_C |
| GSLYST00001391001 | non-specific | 320175 | 1    | 53   | 4.86E-07    | 43.3178 | cd15047   | 7tmC_GABA-B-like                               | N  | cl28897 | Class_C |
| GSLYST00001392001 | superfamily  | 333717 | 3    | 100  | 1.49E-28    | 103.024 | cl28897   | 7tm_GPCRs superfamily                          | C  | -       | Class_C |
| GSLYST00001392001 | non-specific | 320175 | 3    | 100  | 1.49E-28    | 103.024 | cd15047   | 7tmC_GABA-B-like                               | C  | cl28897 | Class_C |
| GSLYST00001393001 | superfamily  | 333717 | 9    | 61   | 2.14E-06    | 42.1622 | cl28897   | 7tm_GPCRs superfamily                          | N  | -       | Class_C |
| GSLYST00001393001 | non-specific | 320175 | 9    | 61   | 2.14E-06    | 42.1622 | cd15047   | 7tmC_GABA-B-like                               | N  | cl28897 | Class_C |
| GSLYST00001475001 | specific     | 320091 | 543  | 809  | 8.79E-58    | 197.459 | cd13953   | 7tm_classC_mGluR-like                          | -  | cl28897 | Class_C |
| GSLYST00001475001 | superfamily  | 333717 | 543  | 809  | 8.79E-58    | 197.459 | cl28897   | 7tm_GPCRs superfamily                          | -  | -       | Class_C |
| GSLYST00001475001 | specific     | 307306 | 56   | 423  | 1.15E-37    | 143.272 | pfam01094 | ANF_receptor                                   | -  | cl27603 | Class_C |
| GSLYST00001475001 | superfamily  | 307306 | 56   | 423  | 1.15E-37    | 143.272 | cl27603   | ANF_receptor superfamily                       | -  | -       | Class_C |
| GSLYST00001475001 | specific     | 311495 | 472  | 521  | 7.23E-13    | 63.4118 | pfam07562 | NCD3G                                          | -  | cl08456 | Class_C |
| GSLYST00001475001 | superfamily  | 311495 | 472  | 521  | 7.23E-13    | 63.4118 | cl08456   | NCD3G superfamily                              | -  | -       | Class_C |
| GSLYST00001475001 | non-specific | 107357 | 29   | 431  | 9.08E-79    | 261.023 | cd06362   | PBP1_mGluR                                     | -  | cl10011 | Class_C |
| GSLYST00001475001 | superfamily  | 324556 | 29   | 431  | 9.08E-79    | 261.023 | cl10011   | Periplasmic_Binding_Protein_Type_1 superfamily | -  | -       | Class_C |
| GSLYST00001475001 | specific     | 306509 | 726  | 808  | 2.25E-18    | 81.0697 | pfam00003 | 7tm_3                                          | N  | cl02802 | Class_C |
| GSLYST00001475001 | superfamily  | 306509 | 726  | 808  | 2.25E-18    | 81.0697 | cl02802   | 7tm_3 superfamily                              | N  | -       | Class_C |
| GSLYST00001475001 | specific     | 223755 | 105  | 317  | 2.23E-15    | 78.2497 | COG0683   | LivK                                           | N  | cl10011 | Class_C |
| GSLYST00001476001 | specific     | 307306 | 39   | 435  | 6.70E-53    | 184.488 | pfam01094 | ANF_receptor                                   | -  | cl27603 | Class_C |
| GSLYST00001476001 | superfamily  | 307306 | 39   | 435  | 6.70E-53    | 184.488 | cl27603   | ANF_receptor superfamily                       | -  | -       | Class_C |
| GSLYST00001476001 | specific     | 223755 | 112  | 433  | 1.59E-09    | 60.1453 | COG0683   | LivK                                           | -  | cl10011 | Class_C |
| GSLYST00001476001 | specific     | 311495 | 468  | 517  | 1.78E-11    | 59.1747 | pfam07562 | NCD3G                                          | -  | cl08456 | Class_C |
| GSLYST00001476001 | superfamily  | 311495 | 468  | 517  | 1.78E-11    | 59.1747 | cl08456   | NCD3G superfamily                              | -  | -       | Class_C |
| GSLYST00001476001 | non-specific | 107357 | 5    | 434  | 2.62E-95    | 301.084 | cd06362   | PBP1_mGluR                                     | -  | cl10011 | Class_C |
| GSLYST00001476001 | superfamily  | 324556 | 5    | 434  | 2.62E-95    | 301.084 | cl10011   | Periplasmic_Binding_Protein_Type_1 superfamily | -  | -       | Class_C |
| GSLYST00001476001 | non-specific | 320091 | 540  | 664  | 4.43E-30    | 118.878 | cd13953   | 7tm_classC_mGluR-like                          | C  | cl28897 | Class_C |
| GSLYST00001476001 | superfamily  | 333717 | 540  | 664  | 4.43E-30    | 118.878 | cl28897   | 7tm_GPCRs superfamily                          | C  | -       | Class_C |
| GSLYST00005217001 | specific     | 307306 | 53   | 443  | 1.67E-42    | 156.368 | pfam01094 | ANF_receptor                                   | -  | cl27603 | Class_C |
| GSLYST00005217001 | superfamily  | 307306 | 53   | 443  | 1.67E-42    | 156.368 | cl27603   | ANF_receptor superfamily                       | -  | -       | Class_C |
| GSLYST00005217001 | specific     | 223755 | 107  | 450  | 1.72E-06    | 50.5153 | COG0683   | LivK                                           | -  | cl10011 | Class_C |
| GSLYST00005217001 | specific     | 311495 | 494  | 543  | 4.39E-12    | 61.1006 | pfam07562 | NCD3G                                          | -  | cl08456 | Class_C |
| GSLYST00005217001 | superfamily  | 311495 | 494  | 543  | 4.39E-12    | 61.1006 | cl08456   | NCD3G superfamily                              | -  | -       | Class_C |
| GSLYST00005217001 | non-specific | 107357 | 19   | 446  | 4.96E-93    | 295.691 | cd06362   | PBP1_mGluR                                     | -  | cl10011 | Class_C |
| GSLYST00005217001 | superfamily  | 324556 | 19   | 446  | 4.96E-93    | 295.691 | cl10011   | Periplasmic_Binding_Protein_Type_1 superfamily | -  | -       | Class_C |
| GSLYST00005217001 | non-specific | 320091 | 595  | 690  | 6.93E-26    | 106.937 | cd13953   | 7tm_classC_mGluR-like                          | C  | cl28897 | Class_C |
| GSLYST00005217001 | superfamily  | 333717 | 595  | 690  | 6.93E-26    | 106.937 | cl28897   | 7tm_GPCRs superfamily                          | C  | -       | Class_C |
| GSLYST00005791001 | specific     | 306509 | 577  | 667  | 1.01E-27    | 107.263 | pfam00003 | 7tm_3                                          | -  | cl02802 | Class_C |
| GSLYST00005791001 | superfamily  | 306509 | 577  | 667  | 1.01E-27    | 107.263 | cl02802   | 7tm_3 superfamily                              | -  | -       | Class_C |
| GSLYST00005791001 | superfamily  | 333717 | 418  | 670  | 2.85E-145   | 422.792 | cl28897   | 7tm_GPCRs superfamily                          | -  | -       | Class_C |
| GSLYST00005791001 | specific     | 320600 | 418  | 670  | 2.85E-145   | 422.792 | cd15934   | 7tmC_mGluRs_group2_3                           | -  | cl28897 | Class_C |
| GSLYST00005791001 | specific     | 311495 | 351  | 398  | 1.44E-15    | 70.7306 | pfam07562 | NCD3G                                          | -  | cl08456 | Class_C |
| GSLYST00005791001 | superfamily  | 311495 | 351  | 398  | 1.44E-15    | 70.7306 | cl08456   | NCD3G superfamily                              | -  | -       | Class_C |
| GSLYST00005791001 | specific     | 307306 | 8    | 313  | 2.89E-49    | 174.858 | pfam01094 | ANF_receptor                                   | N  | cl27603 | Class_C |
| GSLYST00005791001 | superfamily  | 307306 | 8    | 313  | 2.89E-49    | 174.858 | cl27603   | ANF_receptor superfamily                       | N  | -       | Class_C |
| GSLYST00005791001 | non-specific | 107357 | 2    | 337  | 3.62E-147   | 435.519 | cd06362   | PBP1_mGluR                                     | N  | cl10011 | Class_C |
| GSLYST00005791001 | superfamily  | 324556 | 2    | 337  | 3.62E-147   | 435.519 | cl10011   | Periplasmic_Binding_Protein_Type_1 superfamily | N  | -       | Class_C |
| GSLYST00005791001 | specific     | 223755 | 10   | 172  | 1.51E-10    | 63.2269 | COG0683   | LivK                                           | NC | cl10011 | Class_C |
| GSLYST00007018001 | specific     | 320091 | 552  | 801  | 1.43E-59    | 203.237 | cd13953   | 7tm_classC_mGluR-like                          | -  | cl28897 | Class_C |
| GSLYST00007018001 | superfamily  | 333717 | 552  | 801  | 1.43E-59    | 203.237 | cl28897   | 7tm_GPCRs superfamily                          | -  | -       | Class_C |
| GSLYST00007018001 | specific     | 307306 | 46   | 442  | 1.13E-54    | 191.807 | pfam01094 | ANF_receptor                                   | -  | cl27603 | Class_C |
| GSLYST00007018001 | superfamily  | 307306 | 46   | 442  | 1.13E-54    | 191.807 | cl27603   | ANF_receptor superfamily                       | -  | -       | Class_C |
| GSLYST00007018001 | specific     | 223755 | 84   | 451  | 6.10E-14    | 74.0125 | COG0683   | LivK                                           | -  | cl10011 | Class_C |
| GSLYST00007018001 | specific     | 311495 | 481  | 530  | 8.16E-15    | 68.8046 | pfam07562 | NCD3G                                          | -  | cl08456 | Class_C |
| GSLYST00007018001 | superfamily  | 311495 | 481  | 530  | 8.16E-15    | 68.8046 | cl08456   | NCD3G superfamily                              | -  | -       | Class_C |
| GSLYST00007018001 | non-specific | 107357 | 13   | 439  | 2.27E-99    | 317.262 | cd06362   | PBP1_mGluR                                     | -  | cl10011 | Class_C |
| GSLYST00007018001 | superfamily  | 324556 | 13   | 439  | 2.27E-99    | 317.262 | cl10011   | Periplasmic_Binding_Protein_Type_1 superfamily | -  | -       | Class_C |
| GSLYST00007018001 | specific     | 306509 | 718  | 800  | 1.11E-21    | 90.6996 | pfam00003 | 7tm_3                                          | N  | cl02802 | Class_C |
| GSLYST00007018001 | superfamily  | 306509 | 718  | 800  | 1.11E-21    | 90.6996 | cl02802   | 7tm_3 superfamily                              | N  | -       | Class_C |
| GSLYST00007018001 | superfamily  | 328932 | 483  | 541  | 0.00302911  | 38.9951 | cl22855   | TNFRSF superfamily                             | N  | -       | Class_C |
| GSLYST00007018001 | non-specific | 276903 | 483  | 541  | 0.00302911  | 38.9951 | cd10577   | TNFRSF1B                                       | N  | cl22855 | Class_C |
| GSLYST00007621001 | specific     | 133033 | 1085 | 1451 | 3.09E-90    | 293.445 | cd04190   | Chitin_synth_C                                 | -  | cl11394 | Class_C |
| GSLYST00007621001 | superfamily  | 325014 | 1085 | 1451 | 3.09E-90    | 293.445 | cl11394   | Glyco_tranf_GTA_type superfamily               | -  | -       | Class_C |
| GSLYST00007621001 | superfamily  | 333717 | 1476 | 1613 | 0.00717179  | 40.2362 | cl28897   | 7tm_GPCRs superfamily                          | N  | -       | Class_C |
| GSLYST00007621001 | non-specific | 320175 | 1476 | 1613 | 0.00717179  | 40.2362 | cd15047   | 7tmC_GABA-B-like                               | N  | cl28897 | Class_C |
| GSLYST00007621001 | specific     | 224136 | 1287 | 1626 | 3.22E-17    | 86.5297 | COG1215   | BcsA                                           | N  | cl26112 | Class_C |
| GSLYST00007621001 | superfamily  | 330933 | 1287 | 1626 | 3.22E-17    | 86.5297 | cl26112   | Glyco_tranf_2_3 superfamily                    | N  | -       | Class_C |
| GSLYST00007621001 | superfamily  | 330933 | 1294 | 1528 | 7.48E-07    | 53.7856 | cl26112   | Glyco_tranf_2_3 superfamily                    | N  | -       | Class_C |
| GSLYST00007621001 | non-specific | 275076 | 1290 | 1497 | 1.37E-12    | 71.6907 | TIGR04242 | nodulat_NodC                                   | N  | cl26109 | Class_C |
| GSLYST00007621001 | non-specific | 236171 | 1482 | 1591 | 0.00913813  | 40.837  | PRK08168  | PRK08168                                       | N  | cl27656 | Class_C |
| GSLYST00007621001 | non-specific | 236882 | 1294 | 1528 | 7.48E-07    | 53.7856 | PRK11204  | PRK11204                                       | N  | cl26112 | Class_C |
| GSLYST00007621001 | superfamily  | 332477 | 1482 | 1591 | 0.00913813  | 40.837  | cl27656   | Proton_antipo_N superfamily                    | N  | -       | Class_C |
| GSLYST00007621001 | non-specific | 308649 | 1275 | 1456 | 8.65E-23    | 104.833 | pfam03142 | Chitin_synth_2                                 | NC | cl26109 | Class_C |
| GSLYST00007621001 | superfamily  | 330930 | 1275 | 1456 | 8.65E-23    | 104.833 | cl26109   | Chitin_synth_2 superfamily                     | NC | -       | Class_C |
| GSLYST00007621001 | non-specific | 308925 | 1481 | 1610 | 0.00        |         |           |                                                |    |         |         |

|                   |              |        |      |      |             |         |           |                                                |    |         |         |
|-------------------|--------------|--------|------|------|-------------|---------|-----------|------------------------------------------------|----|---------|---------|
| GSLYST00007723001 | superfamily  | 324556 | 1519 | 1984 | 1.81E-62    | 221.733 | cl10011   | Periplasmic_Binding_Protein_Type_1 superfamily | -  | -       | Class_C |
| GSLYST00007723001 | superfamily  | 324556 | 46   | 522  | 9.03E-53    | 193.613 | cl10011   | Periplasmic_Binding_Protein_Type_1 superfamily | -  | -       | Class_C |
| GSLYST00007723001 | superfamily  | 324556 | 565  | 995  | 1.34E-51    | 190.147 | cl10011   | Periplasmic_Binding_Protein_Type_1 superfamily | -  | -       | Class_C |
| GSLYST00007723001 | superfamily  | 324556 | 2038 | 2494 | 3.24E-51    | 188.991 | cl10011   | Periplasmic_Binding_Protein_Type_1 superfamily | -  | -       | Class_C |
| GSLYST00007723001 | superfamily  | 324556 | 1046 | 1446 | 1.15E-48    | 181.287 | cl10011   | Periplasmic_Binding_Protein_Type_1 superfamily | -  | -       | Class_C |
| GSLYST00007723001 | non-specific | 307306 | 597  | 800  | 1.06E-14    | 77.7876 | pfam01094 | ANF_receptor                                   | C  | cl27603 | Class_C |
| GSLYST00007723001 | superfamily  | 307306 | 597  | 800  | 1.06E-14    | 77.7876 | cl27603   | ANF_receptor superfamily                       | C  | -       | Class_C |
| GSLYST00007723001 | specific     | 223755 | 1547 | 1750 | 6.69E-09    | 60.5305 | COG0683   | LivK                                           | C  | cl10011 | Class_C |
| GSLYST00007723001 | specific     | 223755 | 1046 | 1274 | 2.56E-08    | 58.6045 | COG0683   | LivK                                           | C  | cl10011 | Class_C |
| GSLYST00007723001 | non-specific | 237959 | 133  | 241  | 0.00279038  | 42.7008 | PRK15404  | PRK15404                                       | C  | cl10011 | Class_C |
| GSLYST00007723001 | specific     | 223755 | 145  | 287  | 1.14E-10    | 65.9233 | COG0683   | LivK                                           | NC | cl10011 | Class_C |
| GSLYST00007723001 | specific     | 223755 | 2138 | 2333 | 1.97E-05    | 49.3597 | COG0683   | LivK                                           | NC | cl10011 | Class_C |
| GSLYST00007723001 | specific     | 223755 | 665  | 793  | 0.000908209 | 43.967  | COG0683   | LivK                                           | NC | cl10011 | Class_C |
| GSLYST00008612001 | specific     | 306509 | 919  | 1016 | 3.30E-22    | 93.0108 | pfam00003 | 7tm_3                                          | -  | cl02802 | Class_C |
| GSLYST00008612001 | superfamily  | 306509 | 919  | 1016 | 3.30E-22    | 93.0108 | cl02802   | 7tm_3 superfamily                              | -  | -       | Class_C |
| GSLYST00008612001 | superfamily  | 333717 | 771  | 1019 | 1.00E-131   | 408.564 | cl28897   | 7tm_GPCRs superfamily                          | -  | -       | Class_C |
| GSLYST00008612001 | specific     | 320412 | 771  | 1019 | 1.00E-131   | 408.564 | cd15285   | 7tmC_mGluR_group1                              | -  | cl28897 | Class_C |
| GSLYST00008612001 | specific     | 307306 | 216  | 646  | 2.57E-69    | 235.719 | pfam01094 | ANF_receptor                                   | -  | cl27603 | Class_C |
| GSLYST00008612001 | superfamily  | 307306 | 216  | 646  | 2.57E-69    | 235.719 | cl27603   | ANF_receptor superfamily                       | -  | -       | Class_C |
| GSLYST00008612001 | specific     | 311495 | 691  | 740  | 2.63E-14    | 68.4194 | pfam07562 | NCD3G                                          | -  | cl08456 | Class_C |
| GSLYST00008612001 | superfamily  | 311495 | 691  | 740  | 2.63E-14    | 68.4194 | cl08456   | NCD3G superfamily                              | -  | -       | Class_C |
| GSLYST00008612001 | specific     | 107357 | 182  | 673  | 0           | 611.17  | cd06362   | PBP1_mGluR                                     | -  | cl10011 | Class_C |
| GSLYST00008612001 | superfamily  | 324556 | 182  | 673  | 0           | 611.17  | cl10011   | Periplasmic_Binding_Protein_Type_1 superfamily | -  | -       | Class_C |
| GSLYST00008612001 | specific     | 223755 | 302  | 525  | 9.12E-15    | 77.8645 | COG0683   | LivK                                           | NC | cl10011 | Class_C |
| GSLYST00009087001 | specific     | 306509 | 32   | 114  | 4.43E-15    | 66.4321 | pfam00003 | 7tm_3                                          | N  | cl02802 | Class_C |
| GSLYST00009087001 | superfamily  | 306509 | 32   | 114  | 4.43E-15    | 66.4321 | cl02802   | 7tm_3 superfamily                              | N  | -       | Class_C |
| GSLYST00009087001 | superfamily  | 333717 | 8    | 119  | 4.61E-55    | 173.767 | cl28897   | 7tm_GPCRs superfamily                          | N  | -       | Class_C |
| GSLYST00009087001 | non-specific | 320421 | 8    | 119  | 4.61E-55    | 173.767 | cd15294   | 7tmC_GABA-B-R2                                 | N  | cl28897 | Class_C |
| GSLYST00009472001 | superfamily  | 333717 | 81   | 323  | 6.94E-132   | 375.43  | cl28897   | 7tm_GPCRs superfamily                          | -  | -       | Class_C |
| GSLYST00009472001 | specific     | 320173 | 81   | 323  | 6.94E-132   | 375.43  | cl15045   | 7tmC_mGluRs                                    | -  | cl28897 | Class_C |
| GSLYST00009472001 | specific     | 311495 | 2    | 51   | 1.02E-07    | 47.6187 | pfam07562 | NCD3G                                          | -  | cl08456 | Class_C |
| GSLYST00009472001 | superfamily  | 311495 | 2    | 51   | 1.02E-07    | 47.6187 | cl08456   | NCD3G superfamily                              | -  | -       | Class_C |
| GSLYST00009472001 | specific     | 306509 | 234  | 320  | 9.95E-24    | 93.396  | pfam00003 | 7tm_3                                          | N  | cl02802 | Class_C |
| GSLYST00009472001 | superfamily  | 306509 | 234  | 320  | 9.95E-24    | 93.396  | cl02802   | 7tm_3 superfamily                              | N  | -       | Class_C |
| GSLYST00009734001 | superfamily  | 333717 | 285  | 544  | 1.91E-86    | 267.889 | cl28897   | 7tm_GPCRs superfamily                          | -  | -       | Class_C |
| GSLYST00009734001 | specific     | 320175 | 285  | 544  | 1.91E-86    | 267.889 | cd15047   | 7tmC_GABA-B-like                               | -  | cl28897 | Class_C |
| GSLYST00009734001 | specific     | 306509 | 462  | 544  | 2.14E-14    | 69.1285 | pfam00003 | 7tm_3                                          | N  | cl02802 | Class_C |
| GSLYST00009734001 | superfamily  | 306509 | 462  | 544  | 2.14E-14    | 69.1285 | cl02802   | 7tm_3 superfamily                              | N  | -       | Class_C |
| GSLYST00009734001 | non-specific | 307306 | 1    | 237  | 1.85E-10    | 61.9944 | pfam01094 | ANF_receptor                                   | N  | cl27603 | Class_C |
| GSLYST00009734001 | superfamily  | 307306 | 1    | 237  | 1.85E-10    | 61.9944 | cl27603   | ANF_receptor superfamily                       | N  | -       | Class_C |
| GSLYST00009734001 | non-specific | 107361 | 8    | 234  | 5.17E-18    | 85.3913 | cd06366   | PBP1_GABAB_receptor                            | N  | cl10011 | Class_C |
| GSLYST00009734001 | superfamily  | 324556 | 8    | 234  | 5.17E-18    | 85.3913 | cl10011   | Periplasmic_Binding_Protein_Type_1 superfamily | N  | -       | Class_C |
| GSLYST00011784001 | specific     | 306509 | 1    | 23   | 0.000728487 | 39.4681 | pfam00003 | 7tm_3                                          | N  | cl02802 | Class_C |
| GSLYST00011784001 | superfamily  | 306509 | 1    | 23   | 0.000728487 | 39.4681 | cl02802   | 7tm_3 superfamily                              | N  | -       | Class_C |
| GSLYST00011784001 | superfamily  | 333717 | 3    | 27   | 0.000236745 | 43.3178 | cl28897   | 7tm_GPCRs superfamily                          | N  | -       | Class_C |
| GSLYST00011784001 | non-specific | 320175 | 3    | 27   | 0.000236745 | 43.3178 | cd15047   | 7tmC_GABA-B-like                               | N  | cl28897 | Class_C |
| GSLYST00015156001 | non-specific | 320091 | 2506 | 2728 | 8.24E-31    | 123.116 | cd13953   | 7tm_classC_mGluR-like                          | -  | cl28897 | Class_C |
| GSLYST00015156001 | superfamily  | 333717 | 2506 | 2728 | 8.24E-31    | 123.116 | cl28897   | 7tm_GPCRs superfamily                          | -  | -       | Class_C |
| GSLYST00015156001 | specific     | 307306 | 91   | 462  | 2.56E-29    | 120.93  | pfam01094 | ANF_receptor                                   | -  | cl27603 | Class_C |
| GSLYST00015156001 | non-specific | 307306 | 1042 | 1418 | 2.50E-22    | 100.129 | pfam01094 | ANF_receptor                                   | -  | cl27603 | Class_C |
| GSLYST00015156001 | superfamily  | 307306 | 91   | 462  | 2.56E-29    | 120.93  | cl27603   | ANF_receptor superfamily                       | -  | -       | Class_C |
| GSLYST00015156001 | superfamily  | 307306 | 1042 | 1418 | 2.50E-22    | 100.129 | cl27603   | ANF_receptor superfamily                       | -  | -       | Class_C |
| GSLYST00015156001 | non-specific | 107357 | 1467 | 1884 | 3.50E-73    | 252.934 | cd06362   | PBP1_mGluR                                     | -  | cl10011 | Class_C |
| GSLYST00015156001 | non-specific | 107357 | 42   | 485  | 5.34E-52    | 191.302 | cd06362   | PBP1_mGluR                                     | -  | cl10011 | Class_C |
| GSLYST00015156001 | non-specific | 107357 | 530  | 965  | 3.00E-43    | 165.494 | cd06362   | PBP1_mGluR                                     | -  | cl10011 | Class_C |
| GSLYST00015156001 | non-specific | 107357 | 1006 | 1433 | 2.31E-40    | 157.019 | cd06362   | PBP1_mGluR                                     | -  | cl10011 | Class_C |
| GSLYST00015156001 | non-specific | 107357 | 1971 | 2325 | 5.13E-17    | 86.5279 | cd06362   | PBP1_mGluR                                     | -  | cl10011 | Class_C |
| GSLYST00015156001 | superfamily  | 324556 | 1467 | 1884 | 3.50E-73    | 252.934 | cl10011   | Periplasmic_Binding_Protein_Type_1 superfamily | -  | -       | Class_C |
| GSLYST00015156001 | superfamily  | 324556 | 42   | 485  | 5.34E-52    | 191.302 | cl10011   | Periplasmic_Binding_Protein_Type_1 superfamily | -  | -       | Class_C |
| GSLYST00015156001 | superfamily  | 324556 | 530  | 965  | 3.00E-43    | 165.494 | cl10011   | Periplasmic_Binding_Protein_Type_1 superfamily | -  | -       | Class_C |
| GSLYST00015156001 | superfamily  | 324556 | 1006 | 1433 | 2.31E-40    | 157.019 | cl10011   | Periplasmic_Binding_Protein_Type_1 superfamily | -  | -       | Class_C |
| GSLYST00015156001 | superfamily  | 324556 | 1971 | 2325 | 5.13E-17    | 86.5279 | cl10011   | Periplasmic_Binding_Protein_Type_1 superfamily | -  | -       | Class_C |
| GSLYST00015156001 | specific     | 307306 | 1497 | 1713 | 7.12E-26    | 110.915 | pfam01094 | ANF_receptor                                   | C  | cl27603 | Class_C |
| GSLYST00015156001 | non-specific | 307306 | 560  | 778  | 2.62E-18    | 88.5732 | pfam01094 | ANF_receptor                                   | C  | cl27603 | Class_C |
| GSLYST00015156001 | non-specific | 307306 | 2065 | 2202 | 2.67E-05    | 48.5125 | pfam01094 | ANF_receptor                                   | C  | cl27603 | Class_C |
| GSLYST00015156001 | superfamily  | 307306 | 1497 | 1713 | 7.12E-26    | 110.915 | cl27603   | ANF_receptor superfamily                       | C  | -       | Class_C |
| GSLYST00015156001 | superfamily  | 307306 | 560  | 778  | 2.62E-18    | 88.5732 | cl27603   | ANF_receptor superfamily                       | C  | -       | Class_C |
| GSLYST00015156001 | superfamily  | 307306 | 2065 | 2202 | 2.67E-05    | 48.5125 | cl27603   | ANF_receptor superfamily                       | C  | -       | Class_C |
| GSLYST00015156001 | specific     | 223755 | 619  | 822  | 3.62E-10    | 64.3825 | COG0683   | LivK                                           | C  | cl10011 | Class_C |
| GSLYST00015156001 | specific     | 223755 | 2047 | 2206 | 0.00104872  | 43.967  | COG0683   | LivK                                           | C  | cl10011 | Class_C |
| GSLYST00015156001 | specific     | 223755 | 137  | 471  | 8.65E-06    | 50.5153 | COG0683   | LivK                                           | N  | cl10011 | Class_C |
| GSLYST00015156001 | specific     | 223755 | 1564 | 1742 | 2.19E-08    | 58.6045 | COG0683   | LivK                                           | NC | cl10011 | Class_C |
| GSLYST00015156001 | specific     | 223755 | 1108 | 1243 | 1.19E-06    | 53.2117 | COG0683   | LivK                                           | NC | cl10011 | Class_C |
| GSLYST00016294001 | specific     | 311495 | 307  | 358  | 4.24E-08    | 49.1595 | pfam07562 | NCD3G                                          | -  | cl08456 | Class_C |
| GSLYST00016294001 | superfamily  | 311495 | 307  | 358  | 4.24E-08    | 49.1595 | cl08456   | NCD3G superfamily                              | -  | -       | Class_C |
| GSLYST00016294001 | non-specific | 320091 | 380  | 512  | 2.67E-23    | 98.8481 | cd13953   | 7tm_classC_mGluR-like                          | C  | cl28897 | Class_C |
| GSLYST00016294001 | superfamily  | 333717 | 380  | 512  | 2.67E-23    | 98.8481 | cl28897   | 7tm_GPCRs superfamily                          | C  | -       | Class_C |
| GSLYST00016294001 | non-specific | 307306 | 1    | 256  | 8.21E-11    | 63.15   | pfam01094 | ANF_receptor                                   | N  | cl27603 | Class_C |
| GSLYST00016294001 | superfamily  | 307306 | 1    | 256  | 8.21E-11    | 63.15   | cl27603   | ANF_receptor superfamily                       | N  | -       | Class_C |
| GSLYST00016294001 | non-specific | 107357 | 19   | 259  | 1.97E-17    | 84.6019 | cd06362   | PBP1_mGluR                                     | N  | cl10011 | Class_C |
| GSLYST00016294001 | superfamily  | 324556 | 19   | 259  | 1.97E-17    | 84.6019 | cl10011   | Periplasmic_Binding_Protein_Type_1 superfamily | N  | -       | Class_C |
| GSLYST00016626001 | specific     | 306509 | 539  | 622  | 5.55E-07    | 48.3277 | pfam00003 | 7tm_3                                          | -  | cl02802 | Class_C |
| GSLYST00016626001 | superfamily  | 306509 | 539  | 622  | 5.55E-07    | 48.3277 | cl02802   | 7tm_3 superfamily                              | -  | -       | Class_C |
| GSLYST00016626001 | non-specific | 320091 | 376  | 629  | 1.20E-22    | 97.6925 | cd13953   | 7tm_classC_mGluR-like                          | -  | cl28897 | Class_C |
| GSLYST00016626001 | superfamily  | 333717 | 376  | 629  | 1.20E-22    | 97.6925 | cl28897   | 7tm_GPCRs superfamily                          | -  | -       | Class_C |
| GSLYST00016626001 | specific     | 311495 | 308  | 353  | 5.88E-09    | 52.2411 | pfam07562 | NCD3G                                          | -  | cl08456 | Class_C |
| GSLYST00016626001 | superfamily  | 311495 | 308  | 353  | 5.88E-09    | 52.2411 | cl08456   | NCD3G superfamily                              | -  | -       | Class_C |
| GSLYST00016626001 | non-specific | 307306 | 3    | 250  | 1.14E-12    | 69.3132 | pfam01094 | ANF_receptor                                   | N  | cl27603 | Class_C |
| GSLYST00016626001 | superfamily  | 307306 | 3    | 250  | 1.14E-12    | 69.3132 | cl27603   | ANF_receptor superfamily                       | N  | -       | Class_C |
| GSLYST00016626001 | non-specific | 107357 | 4    | 250  | 1.59E-19    | 91.9207 | cd06362   | PBP1_mGluR                                     | N  | cl10011 | Class_C |
| GSLYST00016626001 | superfamily  | 324556 | 4    | 250  | 1.59E-19    | 91.9207 | cl10011   | Periplasmic_Binding_Protein_Type_1 superfamily | N  | -       | Class_C |
| GSLYST00016627001 | non-specific | 307306 | 3    | 300  | 2.35E-18    | 85.8768 | pfam01094 | ANF_receptor                                   | -  | cl27603 | Class_C |
| GSLYST00016627001 | superfamily  | 307306 | 3    | 300  | 2.35E-18    | 85.8768 | cl27603   | ANF_receptor superfamily                       | -  | -       | Class_C |
| GSLYST00016627001 | specific     | 311495 | 359  | 405  | 1.60E-07    | 47.6187 | pfam07562 | NCD3G                                          | -  | cl08456 | Class_C |
| GSLYST00016627001 | superfamily  | 311495 | 359  | 405  | 1.60E-07    | 47.6187 | cl08456   | NCD3G superfamily                              | -  | -       | Class_C |
| GSLYST00016627001 | non-specific | 320091 | 431  | 556  | 2.00E-09    | 58.0169 | cd13953   | 7tm_classC_mGluR-like                          | C  | cl28897 | Class_C |
| GSLYST00016627001 | superfamily  | 333717 | 431  | 556  | 2.00E-09    | 58.0169 | cl28897   | 7tm_GPCRs superfamily                          | C  | -       | Class_C |
| GSLYST00016627001 | non-specific | 107357 | 2    | 293  | 5.21E-24    | 104.632 | cd06362   | PBP1_mGluR                                     | N  | cl10011 | Class_C |
| GSLYST00016627001 | superfamily  | 324556 | 2    | 293  | 5.21E-24    |         |           |                                                |    |         |         |

|                   |              |        |     |     |             |         |            |                                                |    |         |         |
|-------------------|--------------|--------|-----|-----|-------------|---------|------------|------------------------------------------------|----|---------|---------|
| GSLYST00016629001 | superfamily  | 324556 | 14  | 302 | 3.06E-27    | 114.647 | cl10011    | Periplasmic_Binding_Protein_Type_1 superfamily | N  | -       | Class_C |
| GSLYST00016630001 | non-specific | 307306 | 10  | 323 | 3.34E-17    | 82.41   | pfam01094  | ANF_receptor                                   | -  | cl27603 | Class_C |
| GSLYST00016630001 | superfamily  | 307306 | 10  | 323 | 3.34E-17    | 82.41   | cl27603    | ANF_receptor superfamily                       | -  | -       | Class_C |
| GSLYST00016630001 | specific     | 311495 | 368 | 413 | 1.20E-07    | 48.0039 | pfam07562  | NCD3G                                          | -  | cl08456 | Class_C |
| GSLYST00016630001 | superfamily  | 311495 | 368 | 413 | 1.20E-07    | 48.0039 | cl08456    | NCD3G superfamily                              | -  | -       | Class_C |
| GSLYST00016630001 | superfamily  | 333717 | 438 | 560 | 6.72E-20    | 89.2269 | cl28897    | 7tm_GPCRs superfamily                          | C  | -       | Class_C |
| GSLYST00016630001 | non-specific | 320173 | 438 | 560 | 6.72E-20    | 89.2269 | cd15045    | 7tmC_mGluRs                                    | C  | cl28897 | Class_C |
| GSLYST00016630001 | specific     | 223755 | 10  | 78  | 0.00012989  | 44.3522 | COG0683    | LivK                                           | C  | cl10011 | Class_C |
| GSLYST00016630001 | non-specific | 107357 | 14  | 302 | 5.23E-28    | 116.573 | cd06362    | PBP1_mGluR                                     | N  | cl10011 | Class_C |
| GSLYST00016630001 | superfamily  | 324556 | 14  | 302 | 5.23E-28    | 116.573 | cl10011    | Periplasmic_Binding_Protein_Type_1 superfamily | N  | -       | Class_C |
| GSLYST00016631001 | non-specific | 307306 | 1   | 312 | 1.49E-21    | 95.5068 | pfam01094  | ANF_receptor                                   | -  | cl27603 | Class_C |
| GSLYST00016631001 | superfamily  | 307306 | 1   | 312 | 1.49E-21    | 95.5068 | cl27603    | ANF_receptor superfamily                       | -  | -       | Class_C |
| GSLYST00016631001 | specific     | 311495 | 358 | 403 | 7.16E-07    | 46.0779 | pfam07562  | NCD3G                                          | -  | cl08456 | Class_C |
| GSLYST00016631001 | superfamily  | 311495 | 358 | 403 | 7.16E-07    | 46.0779 | cl08456    | NCD3G superfamily                              | -  | -       | Class_C |
| GSLYST00016631001 | non-specific | 320091 | 426 | 550 | 2.01E-19    | 87.6773 | cl13953    | 7tm_classC_mGluR-like                          | C  | cl28897 | Class_C |
| GSLYST00016631001 | superfamily  | 333717 | 426 | 550 | 2.01E-19    | 87.6773 | cl28897    | 7tm_GPCRs superfamily                          | C  | -       | Class_C |
| GSLYST00016631001 | non-specific | 107357 | 4   | 312 | 6.33E-30    | 122.351 | cd06362    | PBP1_mGluR                                     | N  | cl10011 | Class_C |
| GSLYST00016631001 | superfamily  | 324556 | 4   | 312 | 6.33E-30    | 122.351 | cl10011    | Periplasmic_Binding_Protein_Type_1 superfamily | N  | -       | Class_C |
| GSLYST00016631001 | specific     | 223755 | 4   | 97  | 9.44E-07    | 50.9005 | COG0683    | LivK                                           | NC | cl10011 | Class_C |
| GSLYST00016725001 | specific     | 311495 | 310 | 358 | 2.31E-07    | 47.2335 | pfam07562  | NCD3G                                          | -  | cl08456 | Class_C |
| GSLYST00016725001 | superfamily  | 311495 | 310 | 358 | 2.31E-07    | 47.2335 | cl08456    | NCD3G superfamily                              | -  | -       | Class_C |
| GSLYST00016725001 | non-specific | 320091 | 383 | 476 | 1.53E-14    | 73.0397 | cl13953    | 7tm_classC_mGluR-like                          | C  | cl28897 | Class_C |
| GSLYST00016725001 | superfamily  | 333717 | 383 | 476 | 1.53E-14    | 73.0397 | cl28897    | 7tm_GPCRs superfamily                          | C  | -       | Class_C |
| GSLYST00016725001 | non-specific | 307306 | 2   | 172 | 4.00E-07    | 51.5941 | pfam01094  | ANF_receptor                                   | N  | cl27603 | Class_C |
| GSLYST00016725001 | superfamily  | 307306 | 2   | 172 | 4.00E-07    | 51.5941 | cl27603    | ANF_receptor superfamily                       | N  | -       | Class_C |
| GSLYST00016725001 | specific     | 153137 | 2   | 137 | 5.53E-13    | 69.0812 | cd06269    | PBP1_glutamate_receptors_like                  | N  | cl10011 | Class_C |
| GSLYST00016725001 | superfamily  | 324556 | 2   | 137 | 5.53E-13    | 69.0812 | cl10011    | Periplasmic_Binding_Protein_Type_1 superfamily | N  | -       | Class_C |
| GSLYST00016725001 | non-specific | 276900 | 315 | 370 | 0.00398225  | 36.4183 | cd00185    | TNFRSF                                         | N  | cl22855 | Class_C |
| GSLYST00016725001 | superfamily  | 328932 | 315 | 370 | 0.00398225  | 36.4183 | cl22855    | TNFRSF superfamily                             | N  | -       | Class_C |
| GSLYST00016726001 | non-specific | 320091 | 428 | 637 | 2.61E-32    | 125.042 | cl13953    | 7tm_classC_mGluR-like                          | -  | cl28897 | Class_C |
| GSLYST00016726001 | superfamily  | 333717 | 428 | 637 | 2.61E-32    | 125.042 | cl28897    | 7tm_GPCRs superfamily                          | -  | -       | Class_C |
| GSLYST00016726001 | non-specific | 307306 | 10  | 243 | 0.00221961  | 40.4233 | pfam01094  | ANF_receptor                                   | -  | cl27603 | Class_C |
| GSLYST00016726001 | superfamily  | 307306 | 10  | 243 | 0.00221961  | 40.4233 | cl27603    | ANF_receptor superfamily                       | -  | -       | Class_C |
| GSLYST00016726001 | specific     | 311495 | 359 | 400 | 1.55E-06    | 45.3075 | pfam07562  | NCD3G                                          | -  | cl08456 | Class_C |
| GSLYST00016726001 | superfamily  | 311495 | 359 | 400 | 1.55E-06    | 45.3075 | cl08456    | NCD3G superfamily                              | -  | -       | Class_C |
| GSLYST00016726001 | non-specific | 107357 | 4   | 293 | 1.18E-08    | 57.6379 | cd06362    | PBP1_mGluR                                     | N  | cl10011 | Class_C |
| GSLYST00016726001 | superfamily  | 324556 | 4   | 293 | 1.18E-08    | 57.6379 | cl10011    | Periplasmic_Binding_Protein_Type_1 superfamily | N  | -       | Class_C |
| GSLYST00016726001 | specific     | 306509 | 591 | 637 | 7.61E-08    | 50.6389 | pfam00003  | 7tm_3                                          | NC | cl02802 | Class_C |
| GSLYST00016726001 | superfamily  | 306509 | 591 | 637 | 7.61E-08    | 50.6389 | cl02802    | 7tm_3 superfamily                              | NC | -       | Class_C |
| GSLYST00017437001 | specific     | 320091 | 566 | 841 | 1.61E-42    | 155.472 | cl13953    | 7tm_classC_mGluR-like                          | -  | cl28897 | Class_C |
| GSLYST00017437001 | superfamily  | 333717 | 566 | 841 | 1.61E-42    | 155.472 | cl28897    | 7tm_GPCRs superfamily                          | -  | -       | Class_C |
| GSLYST00017437001 | non-specific | 307306 | 88  | 276 | 1.77E-07    | 53.9053 | pfam01094  | ANF_receptor                                   | C  | cl27603 | Class_C |
| GSLYST00017437001 | superfamily  | 307306 | 88  | 276 | 1.77E-07    | 53.9053 | cl27603    | ANF_receptor superfamily                       | C  | -       | Class_C |
| GSLYST00017437001 | non-specific | 153138 | 52  | 293 | 4.49E-17    | 83.5744 | cd06350    | PBP1_GPCR_family_C_like                        | C  | cl10011 | Class_C |
| GSLYST00017437001 | superfamily  | 324556 | 52  | 293 | 4.49E-17    | 83.5744 | cl10011    | Periplasmic_Binding_Protein_Type_1 superfamily | C  | -       | Class_C |
| GSLYST00017437001 | specific     | 306509 | 749 | 837 | 1.26E-08    | 53.3353 | pfam00003  | 7tm_3                                          | N  | cl02802 | Class_C |
| GSLYST00017437001 | superfamily  | 306509 | 749 | 837 | 1.26E-08    | 53.3353 | cl02802    | 7tm_3 superfamily                              | N  | -       | Class_C |
| GSLYST00017437001 | non-specific | 314458 | 302 | 356 | 0.00101577  | 40.3498 | pfam11568  | Med29                                          | N  | cl13081 | Class_C |
| GSLYST00017437001 | superfamily  | 314458 | 302 | 356 | 0.00101577  | 40.3498 | cl13081    | Med29 superfamily                              | N  | -       | Class_C |
| GSLYST00021081001 | specific     | 306509 | 673 | 762 | 4.82E-22    | 91.8552 | pfam00003  | 7tm_3                                          | -  | cl02802 | Class_C |
| GSLYST00021081001 | superfamily  | 306509 | 673 | 762 | 4.82E-22    | 91.8552 | cl02802    | 7tm_3 superfamily                              | -  | -       | Class_C |
| GSLYST00021081001 | superfamily  | 333717 | 494 | 765 | 5.24E-138   | 412.884 | cl28897    | 7tm_GPCRs superfamily                          | -  | -       | Class_C |
| GSLYST00021081001 | specific     | 320418 | 494 | 765 | 5.24E-138   | 412.884 | cd15291    | 7tmC_GABA-B-R1                                 | -  | cl28897 | Class_C |
| GSLYST00021081001 | specific     | 307306 | 90  | 446 | 1.56E-60    | 208.755 | pfam01094  | ANF_receptor                                   | C  | cl27603 | Class_C |
| GSLYST00021081001 | superfamily  | 307306 | 90  | 446 | 1.56E-60    | 208.755 | cl27603    | ANF_receptor superfamily                       | -  | -       | Class_C |
| GSLYST00021081001 | specific     | 223755 | 69  | 451 | 2.72E-17    | 84.4129 | COG0683    | LivK                                           | -  | cl10011 | Class_C |
| GSLYST00021081001 | specific     | 107361 | 74  | 467 | 1.55E-123   | 378.143 | cd06366    | PBP1_GABAb_receptor                            | -  | cl10011 | Class_C |
| GSLYST00021081001 | superfamily  | 324556 | 74  | 467 | 1.55E-123   | 378.143 | cl10011    | Periplasmic_Binding_Protein_Type_1 superfamily | -  | -       | Class_C |
| GSLYST00021081001 | non-specific | 226400 | 766 | 835 | 0.000396355 | 43.1686 | COG3883    | CwlO1                                          | C  | cl25603 | Class_C |
| GSLYST00021081001 | superfamily  | 226400 | 766 | 835 | 0.000396355 | 43.1686 | cl25603    | CwlO1 superfamily                              | C  | -       | Class_C |
| GSLYST00021081001 | superfamily  | 327530 | 717 | 846 | 0.00241108  | 40.732  | cl19252    | MreC superfamily                               | C  | -       | Class_C |
| GSLYST00021081001 | non-specific | 237560 | 717 | 846 | 0.00241108  | 40.732  | PRK13922   | PRK13922                                       | C  | cl19252 | Class_C |
| GSLYST00021081001 | non-specific | 318842 | 774 | 822 | 0.00116572  | 38.5511 | pfam16716  | BST2                                           | N  | cl25063 | Class_C |
| GSLYST00021081001 | superfamily  | 318842 | 774 | 822 | 0.00116572  | 38.5511 | cl25063    | BST2 superfamily                               | N  | -       | Class_C |
| GSLYST00007366001 | superfamily  | 333717 | 274 | 333 | 0.000176231 | 42.3385 | cl28897    | 7tm_GPCRs superfamily                          | N  | -       | Class_E |
| GSLYST00007366001 | non-specific | 320094 | 274 | 333 | 0.000176231 | 42.3385 | cd14940    | 7tmE_cAMP_R_Slime_mold                         | N  | cl28897 | Class_E |
| GSLYST00007366001 | non-specific | 307974 | 241 | 331 | 0.0011058   | 40.5151 | pfam02101  | Ocular_alb                                     | NC | cl24143 | Class_E |
| GSLYST00007366001 | superfamily  | 307974 | 241 | 331 | 0.0011058   | 40.5151 | cl24143    | Ocular_alb superfamily                         | NC | -       | Class_E |
| GSLYST00011209001 | specific     | 320095 | 39  | 311 | 2.76E-14    | 72.4366 | cd14964    | 7tm_GPCRs                                      | -  | cl28897 | Class_E |
| GSLYST00011209001 | superfamily  | 333717 | 39  | 311 | 2.76E-14    | 72.4366 | cl28897    | 7tm_GPCRs superfamily                          | -  | -       | Class_E |
| GSLYST00011209001 | non-specific | 283188 | 49  | 191 | 0.000125125 | 43.621  | pfam05462  | Dicty_CAR                                      | C  | cl27462 | Class_E |
| GSLYST00011209001 | superfamily  | 283188 | 49  | 191 | 0.000125125 | 43.621  | cl27462    | Dicty_CAR superfamily                          | C  | -       | Class_E |
| GSLYST00012669001 | superfamily  | 328797 | 24  | 191 | 6.19E-12    | 63.4547 | cl21561    | 7tm_4 superfamily                              | -  | -       | Class_E |
| GSLYST00012669001 | superfamily  | 333717 | 20  | 278 | 2.77E-83    | 252.657 | cl28897    | 7tm_GPCRs superfamily                          | -  | -       | Class_E |
| GSLYST00012669001 | non-specific | 320094 | 20  | 278 | 2.77E-83    | 252.657 | cd14940    | 7tmE_cAMP_R_Slime_mold                         | -  | cl28897 | Class_E |
| GSLYST00012669001 | non-specific | 314555 | 24  | 191 | 6.19E-12    | 63.4547 | pfam11710  | Git3                                           | -  | cl21561 | Class_E |
| GSLYST00004197001 | superfamily  | 328797 | 196 | 517 | 3.11E-94    | 291.426 | cl21561    | 7tm_4 superfamily                              | -  | -       | Class_F |
| GSLYST00004197001 | superfamily  | 333717 | 186 | 518 | 1.36E-177   | 505.291 | cl28897    | 7tm_GPCRs superfamily                          | -  | -       | Class_F |
| GSLYST00004197001 | specific     | 320158 | 186 | 518 | 1.36E-177   | 505.291 | cd15030    | 7tmF_SMO_homolog                               | -  | cl28897 | Class_F |
| GSLYST00004197001 | superfamily  | 321937 | 32  | 162 | 7.35E-56    | 184.493 | cl02447    | CRD_FZ superfamily                             | -  | -       | Class_F |
| GSLYST00004197001 | non-specific | 143560 | 32  | 162 | 7.35E-56    | 184.493 | cd07451    | CRD_SMO                                        | -  | cl02447 | Class_F |
| GSLYST00004197001 | non-specific | 214498 | 33  | 136 | 1.30E-26    | 104.315 | smart00063 | FRI                                            | -  | cl02447 | Class_F |
| GSLYST00004197001 | specific     | 307603 | 196 | 517 | 3.11E-94    | 291.426 | pfam01534  | Frizzled                                       | -  | cl21561 | Class_F |
| GSLYST00004197001 | specific     | 307517 | 33  | 135 | 1.05E-18    | 81.7618 | pfam01392  | Fz                                             | -  | cl02447 | Class_F |
| GSLYST00004507001 | superfamily  | 328797 | 253 | 570 | 0           | 530.635 | cl21561    | 7tm_4 superfamily                              | -  | -       | Class_F |
| GSLYST00004507001 | superfamily  | 333717 | 245 | 570 | 0           | 643.624 | cl28897    | 7tm_GPCRs superfamily                          | -  | -       | Class_F |
| GSLYST00004507001 | specific     | 320162 | 245 | 570 | 0           | 643.624 | cd15034    | 7tmF_FZD1_2_7-like                             | -  | cl28897 | Class_F |
| GSLYST00004507001 | superfamily  | 321937 | 49  | 164 | 4.45E-78    | 241.932 | cl02447    | CRD_FZ superfamily                             | -  | -       | Class_F |
| GSLYST00004507001 | specific     | 143567 | 49  | 164 | 4.45E-78    | 241.932 | cd07458    | CRD_FZ1_like                                   | -  | cl02447 | Class_F |
| GSLYST00004507001 | specific     | 214498 | 51  | 162 | 1.96E-48    | 164.021 | smart00063 | FRI                                            | -  | cl02447 | Class_F |
| GSLYST00004507001 | specific     | 307603 | 253 | 570 | 0           | 530.635 | pfam01534  | Frizzled                                       | -  | cl21561 | Class_F |
| GSLYST00004507001 | specific     | 307517 | 51  | 155 | 1.20E-43    | 151.098 | pfam01392  | Fz                                             | -  | cl02447 | Class_F |
| GSLYST00008596001 | superfamily  | 328797 | 264 | 564 | 1.19E-163   | 469.774 | cl21561    | 7tm_4 superfamily                              | -  | -       | Class_F |
| GSLYST00008596001 | superfamily  | 333717 | 256 | 564 | 0           | 525.098 | cl28897    | 7tm_GPCRs superfamily                          | -  | -       | Class_F |
| GSLYST00008596001 | specific     | 320166 | 256 | 564 | 0           | 525.098 | cd15038    | 7tmF_FZD4                                      | -  | cl28897 | Class_F |
| GSLYST00008596001 | superfamily  | 321937 | 54  | 178 | 5.79E-80    | 248.145 | cl02447    | CRD_FZ superfamily                             | -  | -       | Class_F |
| GSLYST00008596001 | specific     | 143557 | 54  | 178 | 5.79E-80    | 248.145 | cd07448    | CRD_FZ4                                        | NC | cl02447 | Class_F |
| GSLYST00008596001 | specific     | 214498 | 56  | 172 | 5.72E-48    | 163.251 | smart00063 | FRI                                            | -  | cl02447 | Class_F |
| GSLYST00008596001 | specific     | 307603 | 264 | 564 | 1.19E-163   | 469.774 | pfam01534  | Frizzled                                       | -  | cl21561 | Class_F |
| GSLYST00008596001 | specific     | 307517 |     |     |             |         |            |                                                |    |         |         |
