# Supplementary material for: The genome of the simultaneously hermaphroditic snail Lymnaea stagnalis reveals an evolutionary expansion of FMRFamide-like receptors
Source: PubMed Central journal article supplement — Sci Rep. 2024 Nov 25;14:29213. doi: 10.1038/s41598-024-78520-1 (PMC11589774; doi:10.1038/s41598-024-78520-1), 2024-11-25
Supplement: 41598_2024_78520_MOESM26_ESM.pdf [file 41598_2024_78520_MOESM26_ESM.pdf]

**Table ST6.** Orthology analyses (summary statistics) of the *L. stagnalis* predicted proteome, as performed at two distinct levels, metazoans and gastropods.

| Parameter                                           | Metazoa-level Orthology analysis | Gastropoda-level Orthology analysis |
|-----------------------------------------------------|----------------------------------|-------------------------------------|
| Number of species                                   | 20                               | 14                                  |
| Number of genes                                     | 600240                           | 404265                              |
| Number of genes in orthogroups                      | 500283                           | 364557                              |
| Number of unassigned genes                          | 99957                            | 39708                               |
| Percentage of genes in orthogroups                  | 83.3                             | 90.2                                |
| Percentage of unassigned genes                      | 16.7                             | 9.8                                 |
| Number of orthogroups                               | 17669                            | 29428                               |
| Number of species-specific orthogroups*             | 1947                             | 9158                                |
| Number of genes in species-specific orthogroups     | 12160                            | 41817                               |
| Percentage of genes in species-specific orthogroups | 2                                | 10.3                                |
| Mean orthogroup size                                | 28.3                             | 12.4                                |
| Median orthogroup size                              | 14                               | 7                                   |
| G50 (assigned genes)                                | 53                               | 19                                  |
| G50 (all genes)                                     | 40                               | 18                                  |
| O50 (assigned genes)                                | 1977                             | 5033                                |
| O50 (all genes)                                     | 3067                             | 6101                                |
| Number of orthogroups with all species present      | 2312                             | 3275                                |
| Number of single-copy orthogroups                   | 2                                | 154                                 |

\*Orthogroups that consist entirely of genes from one species.

G50: The number of genes in the orthogroup such that 50% of genes are in orthogroups of that size or larger.

O50: The smallest number of orthogroups such that 50% of genes are in orthogroups of that size or larger.

Single-copy orthogroup: An orthogroup with exactly one gene (and no more) from each species.

Unassigned gene: A gene that has not been put into an orthogroup with any other genes.
