# Supplementary material for: The genome of the simultaneously hermaphroditic snail Lymnaea stagnalis reveals an evolutionary expansion of FMRFamide-like receptors
Source: PubMed Central journal article supplement — Sci Rep. 2024 Nov 25;14:29213. doi: 10.1038/s41598-024-78520-1 (PMC11589774; doi:10.1038/s41598-024-78520-1), 2024-11-25
Supplement: 41598_2024_78520_MOESM27_ESM.pdf [file 41598_2024_78520_MOESM27_ESM.pdf]

ST7. Gastropod orthology analysis. Conserved domains associated with the main OGs exclusively contributed by euthyneuran taxa (number of proteins per species). The list is reduced to OGs containing at least 18 sequences, and present in at least 5 of 6 euthyneuran taxa (*R. auricularia* was a posteriori discarded, see text for explanation).

| conserved domain             | OG_14Gastropoda | Euthyneuran taxa         |                              |                          |                          |                             |                            |                  |                            |                                 |                             |                                 |                        |                           |                       |
|------------------------------|-----------------|--------------------------|------------------------------|--------------------------|--------------------------|-----------------------------|----------------------------|------------------|----------------------------|---------------------------------|-----------------------------|---------------------------------|------------------------|---------------------------|-----------------------|
|                              |                 | <i>Lymnaea stagnalis</i> | <i>Biomphalaria glabrata</i> | <i>Bulinus truncatus</i> | <i>Elysia chlorotica</i> | <i>Candidula unificiata</i> | <i>Aplysia californica</i> | TOTAL-EUTHYNEURA | <i>Littorina saxatilis</i> | <i>Potamopyrgus antipodarum</i> | <i>Pomacea canaliculata</i> | <i>Batillaria attramentaria</i> | <i>Lottia gigantea</i> | <i>Gigantopelta aegis</i> | <i>Haliotis rubra</i> |
| CLECT                        | OG0000086       | 46                       | 35                           | 24                       | 1                        | 0                           | 19                         | 125              | 0                          | 0                               | 0                           | 0                               | 0                      | 0                         | 0                     |
| <b>7tmA_FMRFamide_R-like</b> | OG0000164       | 20                       | 28                           | 17                       | 6                        | 13                          | 23                         | 107              | 0                          | 0                               | 0                           | 0                               | 0                      | 0                         | 0                     |
| <b>7tmA_FMRFamide_R-like</b> | OG0000194       | 35                       | 18                           | 8                        | 4                        | 23                          | 10                         | 98               | 0                          | 0                               | 0                           | 0                               | 0                      | 0                         | 0                     |
| BTB, BACK,Kelch-like         | OG0000263       | 57                       | 9                            | 10                       | 0                        | 3                           | 2                          | 81               | 0                          | 0                               | 0                           | 0                               | 0                      | 0                         | 0                     |
| P450_cycloAA_1               | OG0000313       | 7                        | 18                           | 32                       | 4                        | 1                           | 6                          | 68               | 0                          | 0                               | 0                           | 0                               | 0                      | 0                         | 0                     |
| Aerolysin                    | OG0000438       | 12                       | 25                           | 14                       | 1                        | 0                           | 9                          | 61               | 0                          | 0                               | 0                           | 0                               | 0                      | 0                         | 0                     |
| 7tmA_NTSTR-like              | OG0000474       | 7                        | 22                           | 12                       | 1                        | 7                           | 10                         | 59               | 0                          | 0                               | 0                           | 0                               | 0                      | 0                         | 0                     |
| Galactosyltransferase        | OG0000590       | 16                       | 14                           | 8                        | 0                        | 5                           | 11                         | 54               | 0                          | 0                               | 0                           | 0                               | 0                      | 0                         | 0                     |
| BIR                          | OG0000641       | 17                       | 17                           | 9                        | 1                        | 1                           | 4                          | 49               | 0                          | 0                               | 0                           | 0                               | 0                      | 0                         | 0                     |
| IG_like                      | OG0000779       | 7                        | 8                            | 7                        | 21                       | 1                           | 3                          | 47               | 0                          | 0                               | 0                           | 0                               | 0                      | 0                         | 0                     |
| OATP                         | OG0000504       | 6                        | 15                           | 9                        | 2                        | 9                           | 6                          | 47               | 0                          | 0                               | 0                           | 0                               | 0                      | 0                         | 0                     |
| LRR_8                        | OG0000760       | 9                        | 16                           | 3                        | 0                        | 4                           | 13                         | 45               | 0                          | 0                               | 0                           | 0                               | 0                      | 0                         | 0                     |
| 7tmA_ET_R-like               | OG0000843       | 12                       | 13                           | 3                        | 4                        | 9                           | 3                          | 44               | 0                          | 0                               | 0                           | 0                               | 0                      | 0                         | 0                     |
| <b>7tmA_FMRFamide_R-like</b> | OG0000969       | 1                        | 4                            | 3                        | 19                       | 0                           | 14                         | 41               | 0                          | 0                               | 0                           | 0                               | 0                      | 0                         | 0                     |
| Amelogenin / Glutenin        | OG0001218       | 23                       | 7                            | 5                        | 1                        | 2                           | 0                          | 38               | 0                          | 0                               | 0                           | 0                               | 0                      | 0                         | 0                     |
| 7tm_classA_rhodopsin-like    | OG0001291       | 31                       | 1                            | 4                        | 0                        | 1                           | 0                          | 37               | 0                          | 0                               | 0                           | 0                               | 0                      | 0                         | 0                     |
| TNFR                         | OG0001290       | 12                       | 8                            | 9                        | 2                        | 3                           | 0                          | 34               | 0                          | 0                               | 0                           | 0                               | 0                      | 0                         | 0                     |
| MFS_1                        | OG0001548       | 3                        | 5                            | 6                        | 4                        | 10                          | 3                          | 31               | 0                          | 0                               | 0                           | 0                               | 0                      | 0                         | 0                     |
| SGL / atrophin_1             | OG0001383       | 4                        | 8                            | 5                        | 2                        | 9                           | 2                          | 30               | 0                          | 0                               | 0                           | 0                               | 0                      | 0                         | 0                     |
| TNF                          | OG0001622       | 8                        | 14                           | 5                        | 1                        | 1                           | 1                          | 30               | 0                          | 0                               | 0                           | 0                               | 0                      | 0                         | 0                     |
| no domain                    | OG0001447       | 6                        | 10                           | 6                        | 3                        | 3                           | 0                          | 28               | 0                          | 0                               | 0                           | 0                               | 0                      | 0                         | 0                     |
| <b>7tmA_FMRFamide_R-like</b> | OG0002416       | 7                        | 9                            | 4                        | 0                        | 1                           | 6                          | 27               | 0                          | 0                               | 0                           | 0                               | 0                      | 0                         | 0                     |
| 7tmB3_Methuselah-like        | OG0002357       | 1                        | 7                            | 6                        | 10                       | 2                           | 1                          | 27               | 0                          | 0                               | 0                           | 0                               | 0                      | 0                         | 0                     |
| CBM_14 / Glutenin_hmw / VWA  | OG0002345       | 5                        | 14                           | 5                        | 2                        | 0                           | 1                          | 27               | 0                          | 0                               | 0                           | 0                               | 0                      | 0                         | 0                     |
| Fasciclin                    | OG0001545       | 6                        | 5                            | 6                        | 6                        | 0                           | 4                          | 27               | 0                          | 0                               | 0                           | 0                               | 0                      | 0                         | 0                     |
| no domain                    | OG0001574       | 7                        | 10                           | 2                        | 5                        | 0                           | 3                          | 27               | 0                          | 0                               | 0                           | 0                               | 0                      | 0                         | 0                     |
| SH3_and_anchor / DNA_pol3_γ3 | OG0001940       | 11                       | 8                            | 6                        | 0                        | 1                           | 1                          | 27               | 0                          | 0                               | 0                           | 0                               | 0                      | 0                         | 0                     |
| MATH_TRAF_C                  | OG0002388       | 3                        | 10                           | 6                        | 2                        | 1                           | 4                          | 26               | 0                          | 0                               | 0                           | 0                               | 0                      | 0                         | 0                     |
| <b>7tmA_FMRFamide_R-like</b> | OG0002778       | 5                        | 4                            | 3                        | 1                        | 4                           | 8                          | 25               | 0                          | 0                               | 0                           | 0                               | 0                      | 0                         | 0                     |
| UBQ                          | OG0002344       | 2                        | 3                            | 3                        | 0                        | 4                           | 13                         | 25               | 0                          | 0                               | 0                           | 0                               | 0                      | 0                         | 0                     |
| no domain                    | OG0003169       | 1                        | 19                           | 2                        | 1                        | 0                           | 1                          | 24               | 0                          | 0                               | 0                           | 0                               | 0                      | 0                         | 0                     |
| Trypsin                      | OG0002794       | 2                        | 6                            | 7                        | 2                        | 1                           | 6                          | 24               | 0                          | 0                               | 0                           | 0                               | 0                      | 0                         | 0                     |
| HtrL_YibB                    | OG0003057       | 5                        | 2                            | 4                        | 2                        | 8                           | 2                          | 23               | 0                          | 0                               | 0                           | 0                               | 0                      | 0                         | 0                     |
| IG_like                      | OG0002826       | 4                        | 13                           | 3                        | 1                        | 1                           | 1                          | 23               | 0                          | 0                               | 0                           | 0                               | 0                      | 0                         | 0                     |
| EFh                          | OG0003457       | 1                        | 5                            | 7                        | 5                        | 3                           | 1                          | 22               | 0                          | 0                               | 0                           | 0                               | 0                      | 0                         | 0                     |
| no domain                    | OG0003800       | 4                        | 5                            | 11                       | 1                        | 0                           | 1                          | 22               | 0                          | 0                               | 0                           | 0                               | 0                      | 0                         | 0                     |
| Globin                       | OG0003205       | 5                        | 8                            | 4                        | 2                        | 1                           | 0                          | 20               | 0                          | 0                               | 0                           | 0                               | 0                      | 0                         | 0                     |
| MFS                          | OG0004044       | 1                        | 1                            | 1                        | 15                       | 0                           | 2                          | 20               | 0                          | 0                               | 0                           | 0                               | 0                      | 0                         | 0                     |
| Cyt_c_Oxidase_VIIC           | OG0005628       | 3                        | 7                            | 6                        | 1                        | 1                           | 0                          | 18               | 0                          | 0                               | 0                           | 0                               | 0                      | 0                         | 0                     |
| HLH                          | OG0004461       | 5                        | 7                            | 1                        | 2                        | 2                           | 1                          | 18               | 0                          | 0                               | 0                           | 0                               | 0                      | 0                         | 0                     |
