# Supplementary material for: The genome of the simultaneously hermaphroditic snail Lymnaea stagnalis reveals an evolutionary expansion of FMRFamide-like receptors
Source: PubMed Central journal article supplement — Sci Rep. 2024 Nov 25;14:29213. doi: 10.1038/s41598-024-78520-1 (PMC11589774; doi:10.1038/s41598-024-78520-1), 2024-11-25
Supplement: 41598_2024_78520_MOESM28_ESM.pdf [file 41598_2024_78520_MOESM28_ESM.pdf]

**ST8.** Annotation of *L. stagnalis* GPCRs found organized in clusters in the genome assembly. Groups of tandem genes (clusters) are named as a function of their size (4 to 26 genes) and further numbered from 1 to n (e.g., C16-2 is the 2nd cluster of 16 genes, as based on gene prediction identifier).

"a" or "b" indicates a subdivision of the group into two different GPCRclasses (e.g., C06-6a: class\_A and C06-6b: class\_C).

| Cluster | annotation                | 6 to 7 TMHs           | < 6 TMHs         | alternative or additional annotations                             |
|---------|---------------------------|-----------------------|------------------|-------------------------------------------------------------------|
| C26-2   | 7tmA_FMRFamide_R-like     | 13                    | 13 (0 to 5 TMHs) | PHA02638;7tmA_TACR_family                                         |
| C26-1   | 7tmA_FMRFamide_R-like     | 23                    | 3 (2;2;4 TMHs)   |                                                                   |
| C16-2   | 7tmA_FMRFamide_R-like     | 15                    | 1 (4 TMHs)       |                                                                   |
| C16-1   | 7tmA_FMRFamide_R-like     | 15                    | 1 (5 TMHs)       |                                                                   |
| C14     | 7tmA_CCKR-like            | 2                     | 12 (2 to 4 TMHs) | PHA02638;7tmA_mAChR_DM1-like;7tmA_NTSR-like;7tmA_FMRFamide_R-like |
| C13     | 7tmA_FMRFamide_R-like     | 12                    | 1 (3 TMHs)       | MECDP_synthase                                                    |
| C11     | 7tmA_FMRFamide_R-like     | 10                    | 1 (3 TMHs)       | 7TM_GPCR_Srw                                                      |
| C09-5   | 7tmA_FMRFamide_R-like     | 8                     | 1 (5TMHs)        | 7TM_GPCR_Srw                                                      |
| C09-4   | 7tmA_amine_R-like         | 9                     | 0                | PHA03087;PHA02638                                                 |
| C09-3   | 7tmA_FMRFamide_R-like     | 6                     | 3 (2;2;4 TMHs)   |                                                                   |
| C09-2   | 7tmA_TAARs                | 7                     | 2 (2;5 TMHs)     | 7tmA_FMRFamide_R-like; PHA03087                                   |
| C09-1   | 7tmA_FMRFamide_R-like     | 7                     | 2 (5 TMHs)       |                                                                   |
|         |                           | 0 (but see            |                  | PHA03087;PHA02638;7tmA_NTSR-like;7tmA_ETH-R;7tmA_BNGR-A34-        |
| C08-5   | 7tm_classA_rhodopsin-like | colocated transcript) | 7 (2 to 4 TMHs)  | like;7tmA_SSTR3;7tmA_NPYR-like;7tmA_NPFFR                         |
| C08-4   | 7tmA_FMRFamide_R-like     | 7                     | 1 (5TMHs)        | 7TM_GPCR_Srw                                                      |
| C08-4   | 7tmA_amine_R-like         | 6                     | 2 (3;5 TMHs)     | PHA03087;PHA02638;7tmA_TAARs                                      |
| C08-3   | 7tmA_FMRFamide_R-like     | 7                     | 1 (4 TMHs)       |                                                                   |
| C08-2   | 7tmA_FMRFamide_R-like     | 7                     | 1 (5 TMHs)       | 7tmF_FZD1_2_7-like;7TM_GPCR_Srw                                   |
| C08-1   | 7tmA_FMRFamide_R-like     | 5                     | 3 (4 to 5 TMHs)  | PHA02638;7TM_GPCR_Srx;7TM_GPCR_Srw;                               |
| C06-8   | 7tm_classA_rhodopsin-like | 4                     | 2 (5TMHs)        | PHA03087                                                          |
| C06-7   | 7tmA_FMRFamide_R-like     | 6                     | 0                | PHA02638;7TM_GPCR_Srx                                             |
| C06-6b  | 7tm_classC_mGluR-like     | 1                     | 1 (3 TMHs)       | NCD3G;PBP1_mGluR                                                  |
| C06-6a  | 7tmA_FMRFamide_R-like     | 3                     | 1 (4TMHs)        |                                                                   |
| C06-5   | 7tm_classC_mGluR-like     | 2                     | 4 (3 TMHs)       | NCD3G;PBP1_mGluR                                                  |
| C06-4   | 7tmA_FMRFamide_R-like     | 6                     | 0                | PHA03087;7TM_GPCR_Srw                                             |
| C06-3   | 7tmA_FMRFamide_R-like     | 5                     | 1 (2TMHs)        | 7TM_GPCR_Srw                                                      |
| C06-2   | 7tmA_AstA_R_insect        | 4                     | 2 (2;5 TMHs)     | PHA03087;7tmA_NPFFR;7tmA_CCKR-like                                |
| C06-1   | 7tmA_FMRFamide_R-like     | 2                     | 4(2 to 3 TMHs)   | 7TM_GPCR_Srw;PHA02638                                             |
| C05-6   | 7tm_classA_rhodopsin-like | 2                     | 3 (5 TMHs)       | PHA03087; 7tmA_FMRFamide_R-like                                   |
| C05-5   | 7tmA_amine_R-like         | 2                     | 3 (4 to 5 TMHs)  | PHA03087; 7tmA_FMRFamide_R-like;7TM_GPCR_Srw                      |
| C05-4   | 7tmA_ETH-R                | 0                     | 5 (1 to 5TMHs)   | 7tmA_capaR; PHA03087                                              |
| C05-3   | 7tmA_FMRFamide_R-like     | 5                     | 0                | PHA03087                                                          |
| C05-2b  | 7tm_classA_rhodopsin-like | 0                     | 1 (4TMHs)        |                                                                   |
| C05-2a  | 7tmB3_Methuselah-like     | 0                     | 4 (3 to 4 TMHs)  |                                                                   |
| C05-1b  | 7tm_classC_mGluR-like     | 1                     | 0                | PBP1_mGluR_groupII                                                |
| C05-1a  | 7tmA_FMRFamide_R-like     | 4                     | 0                | 7TM_GPCR_Srx                                                      |
| C04-9b  | 7tmB2_Adhesion            | 1                     | 1 (5TMHs)        | GPS                                                               |
| C04-9a  | 7tmA_FMRFamide_R-like     | 1                     | 1 (5TMHs)        | 7tmA_capaR;PHA03087                                               |
| C04-8   | 7tmA_FMRFamide_R-like     | 4                     | 0                | 7TM_GPCR_Srw                                                      |
| C04-7   | 7tmA_FMRFamide_R-like     | 4                     | 0                | 7TM_GPCR_Srw                                                      |
| C04-6   | 7tmA_Adenosine_R          | 4                     | 0                | PHA03087                                                          |
| C04-5   | 7tmA_FMRFamide_R-like     | 3                     | 1 (4TMHs)        | PHA02638;7TM_GPCR_Srw                                             |
| C04-4   | 7tmA_FMRFamide_R-like     | 3                     | 1 (4TMHs)        | PHA02638;PHA03087                                                 |
| C04-3   | 7tmA_FMRFamide_R-like     | 3                     | 1 (4TMHs)        | 7TM_GPCR_Srx                                                      |
| C04-2   | 7tmA_FMRFamide_R-like     | 1                     | 3 (4 to 5 TMHs)  |                                                                   |
| C04-14  | 7tm_classA_rhodopsin-like | 2                     | 2 (2;5 TMHs)     | 7tmA_FMRFamide_R-like; PHA03087                                   |
| C04-13  | 7tmA_FMRFamide_R-like     | 2                     | 2 (2;3 TMHs)     | 7tmB3_Methuselah-like;PHA02638;7tmA_CCKR-like;                    |
| C04-12  | 7tmA_FMRFamide_R-like     | 4                     | 0                | PHA02638;7TM_GPCR_Srw                                             |
| C04-11  | 7tm_classA_rhodopsin-like | 4                     | 0                |                                                                   |
| C04-10  | 7tmA_FMRFamide_R-like     | 4                     | 0                | 7TM_GPCR_Srw                                                      |
| C04-1   | 7tmA_amine_R-like         | 4                     | 0                | PHA03087; 7tm_classA_rhodopsin-like                               |
