# Supplementary material for: The genome of the simultaneously hermaphroditic snail Lymnaea stagnalis reveals an evolutionary expansion of FMRFamide-like receptors
Source: PubMed Central journal article supplement — Sci Rep. 2024 Nov 25;14:29213. doi: 10.1038/s41598-024-78520-1 (PMC11589774; doi:10.1038/s41598-024-78520-1), 2024-11-25

**ST9.** Distribution of *L. stagnalis* GPCRs across B, C, E, and F families. Number of proteins with a full domain (6 to 7 transmembrane helices) versus incomplete domain (less than 6 tms).

| class   | group                  | 6 to 7 TMHs | <6TMs |
|---------|------------------------|-------------|-------|
| Class B | B1 (hormone receptor)  | 12          | 5     |
|         | B2 (adhesion)          | 19          | 14    |
|         | B3 (Methuselah)        | 6           | 6     |
| Class C | GABA B                 | 3           | 3     |
|         | metabotropic glutamate | 12          | 10    |
|         | orphans                | 2           | 1     |
| Class E | cAMP                   | 1           | 1     |
| Class F | Frizzled               | 5           | 0     |

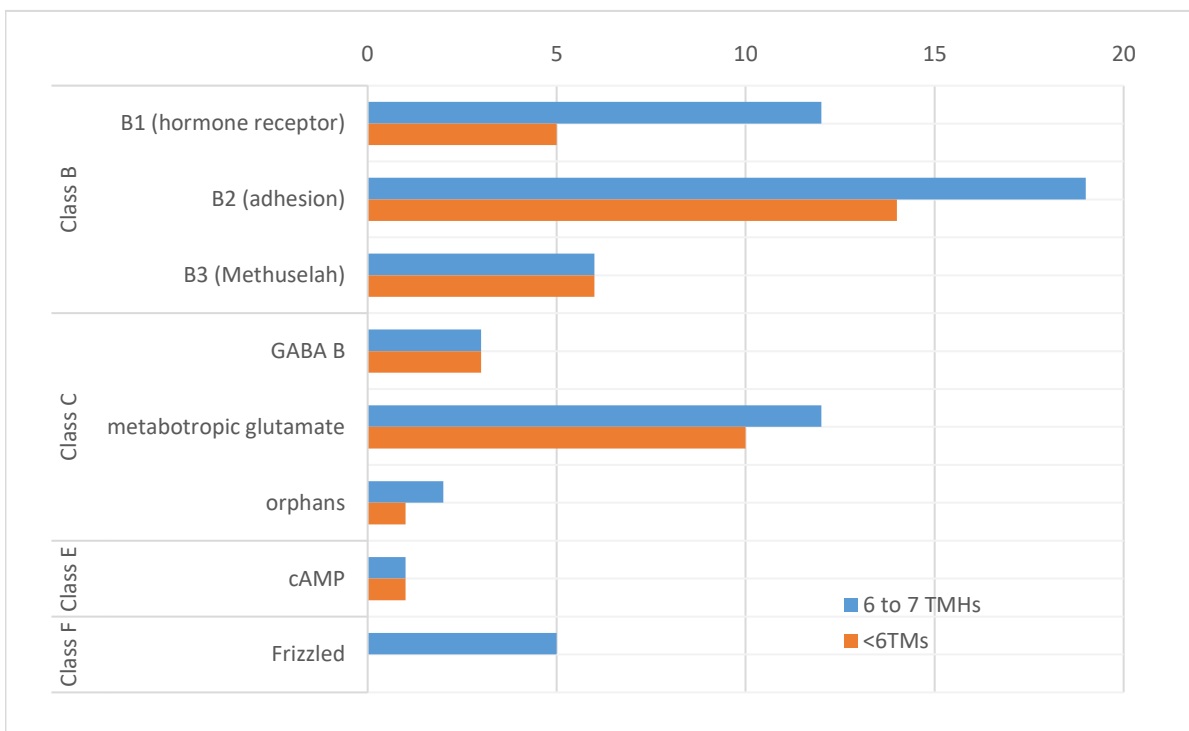

Supplement: 41598_2024_78520_MOESM29_ESM.pdf [file 41598_2024_78520_MOESM29_ESM.pdf]
